# Supplementary material for: A mechanistic study on coupling of CO2 and epoxide mediated by guanidine/TBAI catalysts
Source: Royal Society of Chemistry journal article supplement (doi:10.1039/d3nj04395a), 2023-12-01
Supplement: d3nj04395a1.pdf [file d3nj04395a1.pdf]

## Supporting Information

### Mechanistic study on coupling of CO<sub>2</sub> and epoxide mediated by guanidine/TBAI catalyst

Yihua Fu, Yan Zhang, Changwei Hu, and Zhishan Su\*

Key Laboratory of Green Chemistry and Technology, Ministry of Education, College of Chemistry, Sichuan University, Chengdu, Sichuan, 610064, P.R. China

\*Email: suzhishan@scu.edu.cn

#### Contents

|                                                                                                                                                                                                                                                                                                                                                                   |    |
|-------------------------------------------------------------------------------------------------------------------------------------------------------------------------------------------------------------------------------------------------------------------------------------------------------------------------------------------------------------------|----|
| <b>Table S1</b> The corrected electronic energies ( $E_{ZPE}$ ), enthalpies ( $H$ ), and Gibbs free energies ( $G$ ) for all stationary points (in Hartree) in the non-catalytic reaction, obtained at the M062X-D3/def2-SVP theoretical level. Single-point calculations were run at the M062X-D3/def2-TZVP theoretical level.....                               | S3 |
| <b>Table S2</b> The corrected electronic energies ( $E_{ZPE}$ ), enthalpies ( $H$ ), and Gibbs free energies ( $G$ ) for all stationary points (in Hartree) in G1 catalyzed unfavored mechanism, obtained at the M062X-D3/def2-SVP theoretical level. Single-point calculations were run at the M062X-D3/def2-TZVP theoretical level.....                         | S3 |
| <b>Table S3</b> The corrected electronic energies ( $E_{ZPE}$ ), enthalpies ( $H$ ), and Gibbs free energies ( $G$ ) for all stationary points (in Hartree) in the G1~G4-catalyzed reaction, obtained at the M062X-D3/def2-SVP theoretical level. Single-point calculations were run at the M062X-D3/def2-TZVP theoretical level.....                             | S4 |
| <b>Table S4</b> The corrected electronic energies ( $E_{ZPE}$ ), enthalpies ( $H$ ), and Gibbs free energies ( $G$ ) for all stationary points (in Hartree) in the catalytic reaction involving carbamate salt species, obtained at the M062X-D3/def2-SVP theoretical level. Single-point calculations were run at the M062X-D3/def2-TZVP theoretical level. .... | S5 |
| <b>Table S5</b> The corrected electronic energies ( $E_{ZPE}$ ), enthalpies ( $H$ ), and Gibbs free energies ( $G$ ) for all stationary points (in Hartree) in the guanidine-amide compound (G10)-catalyzed reaction, obtained at the M062X-D3/def2-SVP theoretical level. Single-point calculations were run at the M062X-D3/def2-TZVP theoretical level. ..     | S5 |
| <b>Table S6</b> The corrected electronic energies ( $E_{ZPE}$ ), enthalpies ( $H$ ), and Gibbs free energies ( $G$ ) for all stationary points (in Hartree) in the guanidine/copper(I)(G10-Cu)-catalyzed reaction, obtained at the M06-D3/def2-SVP theoretical level.....                                                                                         | S6 |
| <b>Table S7</b> The corrected electronic energies ( $E_{ZPE}$ ), enthalpies ( $H$ ), and Gibbs free energies ( $G$ ) for all stationary points (in Hartree) in the catalytic reaction using different                                                                                                                                                             |    |

guanidine catalysts, obtained at the M062X-D3/def2-SVP theoretical level. Single-point calculations were run at the M062X-D3/def2-TZVP theoretical level. ....S7

**Table S8** Comparison of energy barrier (kcal mol<sup>-1</sup>) for the uncatalyzed reaction using different computational levels.....S7

**Table S9** Comparison of three tetramethylammonium halides (X=Cl, Br, I). ....S8

**Figure S1** Laplacian ( $\nabla^2\rho$ ) and charge density ( $\rho$ ) on (3, -1) bond critical points (BCP) for **G1-IM1~G9-IM1**, obtained by AIM analysis.....S8

**Study on solvent effect** .....S9

**Figure S2** Optimized geometries of **G1-TS1** and **G1-TS1-c**, and the activation barriers (kcal mol<sup>-1</sup>) in the ring-opening step.....S9

**Figure S3** Catalytic cycle for TOF calculation. ....S9

**Cartesian Coordinates of all Optimized Geometries** .....S10

**Table S1** The corrected electronic energies ( $E_{ZPE}$ ), enthalpies ( $H$ ), and Gibbs free energies ( $G$ ) for all stationary points (in Hartree) in the non-catalytic reaction, obtained at the M062X-D3/def2-SVP theoretical level. Single-point calculations were run at the M062X-D3/def2-TZVP theoretical level.

| Structure       | <sup>a</sup> ZPE | <sup>b</sup> H <sub>c</sub> | <sup>c</sup> G <sub>c</sub> | $E_{ZEP}$  | $H$        | $G$        | <sup>d</sup> G | <sup>e</sup> IF |
|-----------------|------------------|-----------------------------|-----------------------------|------------|------------|------------|----------------|-----------------|
| CO <sub>2</sub> | 0.01215          | 0.01635                     | -0.01222                    | -188.35833 | -188.35413 | -188.38270 | -188.60915     | -               |
| R1              | 0.14035          | 0.15065                     | 0.10220                     | -384.25713 | -384.24683 | -384.29529 | -384.72653     | -               |
| product         | 0.15824          | 0.17115                     | 0.11520                     | -572.64392 | -572.63101 | -572.68697 | -573.33762     | -               |
| B-1-TS          | 0.15342          | 0.16683                     | 0.11042                     | -572.53149 | -572.51809 | -572.57449 | -573.23354     | 226i            |
| B-2-TS          | 0.15201          | 0.16576                     | 0.10830                     | -572.51061 | -572.49686 | -572.55432 | -573.21131     | 856i            |

<sup>a</sup> Zero-point correction energy;

<sup>b</sup> Thermal correction to enthalpy;

<sup>c</sup> Thermal correction to Gibbs free energy;

<sup>d</sup> Gibbs free energy obtained at the M062X-D3/def2-TZVP//M062X-D3/def2-SVP theoretical level;

<sup>e</sup> Imaginary frequencies (cm<sup>-1</sup>) for the transition states.

**Table S2** The corrected electronic energies ( $E_{ZPE}$ ), enthalpies ( $H$ ), and Gibbs free energies ( $G$ ) for all stationary points (in Hartree) in G1 catalyzed unfavored mechanism, obtained at the M062X-D3/def2-SVP theoretical level. Single-point calculations were run at the M062X-D3/def2-TZVP theoretical level.

| Structure | <sup>a</sup> ZPE | <sup>b</sup> H <sub>c</sub> | <sup>c</sup> G <sub>c</sub> | $E_{ZEP}$   | $H$         | $G$         | <sup>d</sup> G | <sup>e</sup> IF |
|-----------|------------------|-----------------------------|-----------------------------|-------------|-------------|-------------|----------------|-----------------|
| G1-TS2-a  | 0.48108          | 0.52132                     | 0.40225                     | -1541.52839 | -1541.48816 | -1541.60722 | -1543.01521    | -179.3i         |
| G1-IM3-a  | 0.48422          | 0.52431                     | 0.40416                     | -1541.54177 | -1541.50169 | -1541.62183 | -1543.02883    | -               |
| G1-TS3-a  | 0.48290          | 0.52268                     | 0.40283                     | -1541.50442 | -1541.46465 | -1541.58449 | -1542.98890    | -430.2i         |
| G1-IM4-a  | 0.48689          | 0.52596                     | 0.40720                     | -1541.57132 | -1541.53225 | -1541.65101 | -1543.05075    | -               |
| G1-TS4-a  | 0.48396          | 0.52209                     | 0.40516                     | -1541.55051 | -1541.51237 | -1541.62930 | -1543.02825    | -294.8i         |
| G1-IM5-a  | 0.48816          | 0.52765                     | 0.40592                     | -1541.57889 | -1541.53940 | -1541.66113 | -1543.06723    | -□              |

<sup>a</sup> Zero-point correction energy;

<sup>b</sup> Thermal correction to enthalpy;

<sup>c</sup> Thermal correction to Gibbs free energy;

<sup>d</sup> Gibbs free energy obtained at the M062X-D3/def2-TZVP//M062X-D3/def2-SVP theoretical level;

<sup>e</sup> Imaginary frequencies (cm<sup>-1</sup>) for the transition states.

**Table S3** The corrected electronic energies ( $E_{ZPE}$ ), enthalpies ( $H$ ), and Gibbs free energies ( $G$ ) for all stationary points (in Hartree) in the G1~G4-catalyzed reaction, obtained at the M062X-D3/def2-SVP theoretical level. Single-point calculations were run at the M062X-D3/def2-TZVP theoretical level.

| Structure | <sup>a</sup> ZPE | <sup>b</sup> H <sub>c</sub> | <sup>c</sup> G <sub>c</sub> | $E_{ZEP}$   | $H$         | $G$         | <sup>d</sup> G | <sup>e</sup> IF |
|-----------|------------------|-----------------------------|-----------------------------|-------------|-------------|-------------|----------------|-----------------|
| G1-COM    | 0.46993          | 0.50414                     | 0.40023                     | -1055.44848 | -1055.41426 | -1055.51817 | -1056.69290    | -               |
| G1-IM1    | 0.46948          | 0.50687                     | 0.39024                     | -1353.17608 | -1353.13870 | -1353.25533 | -1354.44373    | -               |
| G1-TS1    | 0.46666          | 0.50340                     | 0.38987                     | -1353.13834 | -1353.10160 | -1353.21513 | -1354.40543    | 424i            |
| G1-IM2    | 0.46780          | 0.50410                     | 0.39477                     | -1353.16259 | -1353.12629 | -1353.23562 | -1354.42462    | -               |
| G1-TS2    | 0.47742          | 0.51780                     | 0.39735                     | -1541.53094 | -1541.49056 | -1541.61101 | -1543.02151    | 292i            |
| G1-IM3    | 0.48501          | 0.52450                     | 0.40718                     | -1541.55287 | -1541.51338 | -1541.63070 | -1543.03844    | -               |
| G1-TS3    | 0.48497          | 0.52412                     | 0.40840                     | -1541.53744 | -1541.49829 | -1541.61400 | -1543.02064    | 425i            |
| G1-IM4    | 0.48719          | 0.52699                     | 0.40686                     | -1541.58335 | -1541.54355 | -1541.66368 | -1543.06997    | -               |
| G2-COM    | 0.46846          | 0.50510                     | 0.39425                     | -1147.59906 | -1147.56242 | -1147.67327 | -1148.95349    | -               |
| G2-IM1    | 0.46787          | 0.50655                     | 0.38811                     | -1445.33438 | -1445.29570 | -1445.41415 | -1446.70753    | -               |
| G2-TS1    | 0.46576          | 0.50448                     | 0.38743                     | -1445.29827 | -1445.25954 | -1445.37659 | -1446.67211    | 439i            |
| G2-IM2    | 0.46787          | 0.50620                     | 0.39248                     | -1445.32615 | -1445.28782 | -1445.40153 | -1446.69605    | -               |
| G2-TS2    | 0.47747          | 0.51998                     | 0.39377                     | -1633.69011 | -1633.64760 | -1633.77381 | -1635.28943    | 143i            |
| G2-IM3    | 0.48418          | 0.52587                     | 0.40384                     | -1633.71056 | -1633.66887 | -1633.79090 | -1635.30399    | -               |
| G2-TS3    | 0.48329          | 0.52482                     | 0.40242                     | -1633.69367 | -1633.65215 | -1633.77454 | -1635.28659    | 434i            |
| G2-IM4    | 0.48595          | 0.52803                     | 0.40222                     | -1633.73808 | -1633.69601 | -1633.82182 | -1635.33330    | -               |
| G3-COM    | 0.55187          | 0.59184                     | 0.47562                     | -1173.17053 | -1173.13057 | -1173.24678 | -1174.55269    | -               |
| G3-IM1    | 0.55142          | 0.59538                     | 0.46292                     | -1470.90174 | -1470.85777 | -1470.99024 | -1472.30865    | -               |
| G3-TS1    | 0.55013          | 0.59290                     | 0.46737                     | -1470.86200 | -1470.81923 | -1470.94476 | -1472.26492    | 392i            |
| G3-IM2    | 0.55042          | 0.59269                     | 0.47140                     | -1470.87871 | -1470.83644 | -1470.95773 | -1472.27621    | -               |
| G3-TS2    | 0.55946          | 0.60626                     | 0.47211                     | -1659.25251 | -1659.20571 | -1659.33986 | -1660.88056    | 663i            |
| G3-IM3    | 0.56865          | 0.61411                     | 0.48545                     | -1659.27620 | -1659.23073 | -1659.35940 | -1660.89853    | -               |
| G3-TS3    | 0.56776          | 0.61319                     | 0.48396                     | -1659.26110 | -1659.21567 | -1659.34490 | -1660.88106    | 422i            |
| G3-IM4    | 0.57020          | 0.61606                     | 0.48461                     | -1659.30772 | -1659.26186 | -1659.39331 | -1660.92916    | -               |
| G4-COM    | 0.69523          | 0.74658                     | 0.59950                     | -1494.74774 | -1494.69639 | -1494.84347 | -1496.51213    | -               |
| G4-IM1    | 0.69586          | 0.74945                     | 0.59752                     | -1792.48824 | -1792.43465 | -1792.58658 | -1794.26617    | -               |
| G4-TS1    | 0.69394          | 0.74671                     | 0.59653                     | -1792.43756 | -1792.38479 | -1792.53497 | -1794.21961    | 416i            |
| G4-IM2    | 0.69470          | 0.74726                     | 0.59919                     | -1792.46026 | -1792.40769 | -1792.55577 | -1794.23854    | -               |
| G4-TS2    | 0.70423          | 0.76086                     | 0.60350                     | -1980.82918 | -1980.77256 | -1980.92991 | -1982.83455    | 148i            |
| G4-IM3    | 0.71230          | 0.76689                     | 0.61778                     | -1980.85881 | -1980.80422 | -1980.95333 | -1982.85121    | -               |
| G4-TS3    | 0.71172          | 0.76706                     | 0.61551                     | -1980.84209 | -1980.78674 | -1980.93829 | -1982.83486    | 427i            |
| G4-IM4    | 0.71374          | 0.76851                     | 0.61665                     | -1980.88724 | -1980.83247 | -1980.98433 | -1982.88081    | -□              |

<sup>a</sup> Zero-point correction energy;

<sup>b</sup> Thermal correction to enthalpy;

<sup>c</sup> Thermal correction to Gibbs free energy;

<sup>d</sup> Gibbs free energy obtained at the M062X-D3/def2-TZVP//M062X-D3/def2-SVP theoretical level;

<sup>e</sup> Imaginary frequencies (cm<sup>-1</sup>) for the transition states.

**Table S4** The corrected electronic energies ( $E_{ZPE}$ ), enthalpies ( $H$ ), and Gibbs free energies ( $G$ ) for all stationary points (in Hartree) in the catalytic reaction involving carbamate salt species, obtained at the M062X-D3/def2-SVP theoretical level. Single-point calculations were run at the M062X-D3/def2-TZVP theoretical level.

| Structure      | <sup>a</sup> $ZPE$ | <sup>b</sup> $H_c$ | <sup>c</sup> $G_c$ | $E_{ZEP}$   | $H$         | $G$         | <sup>d</sup> $G$ | <sup>e</sup> $\Gamma F$ |
|----------------|--------------------|--------------------|--------------------|-------------|-------------|-------------|------------------|-------------------------|
| <b>G1-TS'</b>  | 0.48336            | 0.52368            | 0.40402            | -1541.53278 | -1541.49245 | -1541.61212 | -1543.01905      | 147 <i>i</i>            |
| <b>G1-IM1'</b> | 0.48558            | 0.52568            | 0.40766            | -1541.53276 | -1541.49267 | -1541.61068 | -1543.01640      | -                       |
| <b>G1-TS1'</b> | 0.48273            | 0.52271            | 0.40388            | -1541.50158 | -1541.46160 | -1541.58043 | -1542.98789      | 456 <i>i</i>            |
| <b>G1-IM2'</b> | 0.48463            | 0.52435            | 0.40792            | -1541.53817 | -1541.49845 | -1541.61488 | -1543.02133      | -                       |
| <b>G1-TS2'</b> | 0.49603            | 0.53854            | 0.41629            | -1729.91172 | -1729.86920 | -1729.99145 | -1731.61515      | 402 <i>i</i>            |
| <b>G1-IM3'</b> | 0.49974            | 0.54263            | 0.41568            | -1729.91548 | -1729.87259 | -1729.99954 | -1731.62699      | -                       |
| <b>G1-TS3'</b> | 0.49951            | 0.54224            | 0.41655            | -1729.89886 | -1729.85613 | -1729.98182 | -1731.60753      | 435 <i>i</i>            |
| <b>G1-IM4'</b> | 0.50241            | 0.54570            | 0.41701            | -1729.93835 | -1729.89506 | -1730.02375 | -1731.64857      | -□                      |

<sup>a</sup> Zero-point correction energy;

<sup>b</sup> Thermal correction to enthalpy;

<sup>c</sup> Thermal correction to Gibbs free energy;

<sup>d</sup> Gibbs free energy obtained at the M062X-D3/def2-TZVP//M062X-D3/def2-SVP theoretical level;

<sup>e</sup> Imaginary frequencies ( $\text{cm}^{-1}$ ) for the transition states.

**Table S5** The corrected electronic energies ( $E_{ZPE}$ ), enthalpies ( $H$ ), and Gibbs free energies ( $G$ ) for all stationary points (in Hartree) in the guanidine-amide compound (G10)-catalyzed reaction, obtained at the M062X-D3/def2-SVP theoretical level. Single-point calculations were run at the M062X-D3/def2-TZVP theoretical level.

| Structure      | <sup>a</sup> $ZPE$ | <sup>b</sup> $H_c$ | <sup>c</sup> $G_c$ | $E_{ZEP}$   | $H$         | $G$         | <sup>d</sup> $G$ | <sup>e</sup> $\Gamma F$ |
|----------------|--------------------|--------------------|--------------------|-------------|-------------|-------------|------------------|-------------------------|
| <b>G10-COM</b> | 0.62482            | 0.66774            | 0.54626            | -1305.92554 | -1305.88261 | -1306.00409 | -1307.46642      | -                       |
| <b>G10-IM1</b> | 0.62433            | 0.67038            | 0.53770            | -1603.65224 | -1603.60619 | -1603.73887 | -1605.21463      | -                       |
| <b>G10-TS1</b> | 0.62276            | 0.66784            | 0.53880            | -1603.63705 | -1603.59197 | -1603.72101 | -1605.19609      | 467 <i>i</i>            |
| <b>G10-IM2</b> | 0.62327            | 0.66820            | 0.54084            | -1603.65424 | -1603.60932 | -1603.73668 | -1605.21050      | -                       |
| <b>G10-TS2</b> | 0.63736            | 0.68600            | 0.55013            | -1792.02726 | -1791.97862 | -1792.11449 | -1793.81047      | 50 <i>i</i>             |
| <b>G10-IM3</b> | 0.63930            | 0.68759            | 0.55221            | -1792.05406 | -1792.00577 | -1792.14115 | -1793.83638      | -                       |
| <b>G10-TS3</b> | 0.63880            | 0.68688            | 0.55186            | -1792.02989 | -1791.98181 | -1792.11683 | -1793.81053      | 439 <i>i</i>            |
| <b>G10-IM4</b> | 0.64160            | 0.68906            | 0.55395            | -1792.06856 | -1792.02110 | -1792.15621 | -1793.85003      | -□                      |

<sup>a</sup> Zero-point correction energy;

<sup>b</sup> Thermal correction to enthalpy;

<sup>c</sup> Thermal correction to Gibbs free energy;

<sup>d</sup> Gibbs free energy obtained at the M062X-D3/def2-TZVP//M062X-D3/def2-SVP theoretical level;

<sup>e</sup> Imaginary frequencies ( $\text{cm}^{-1}$ ) for the transition states.

**Table S6** The corrected electronic energies ( $E_{ZPE}$ ), enthalpies ( $H$ ), and Gibbs free energies ( $G$ ) for all stationary points (in Hartree) in the guanidine/copper(I)(G10-Cu)-catalyzed reaction, obtained at the M06-D3/def2-SVP theoretical level.

| Structure                   | <sup>a</sup> $ZPE$ | <sup>b</sup> $H_c$ | <sup>c</sup> $G_c$ | $E_{ZEP}$   | $H$         | $G$         | <sup>d</sup> $\Gamma$ |
|-----------------------------|--------------------|--------------------|--------------------|-------------|-------------|-------------|-----------------------|
| <b>I (M06)</b>              | 0.00000            | 0.00272            | -0.01976           | -297.83256  | -297.82985  | -297.85233  | -                     |
| <b>CO<sub>2</sub> (M06)</b> | 0.01211            | 0.01631            | -0.01227           | -188.34893  | -188.34473  | -188.37331  | -                     |
| <b>R1 (M06)</b>             | 0.13841            | 0.14878            | 0.10035            | -384.15090  | -384.14054  | -384.18896  | -                     |
| <b>G10-Cu</b>               | 0.47865            | 0.51513            | 0.40562            | -2859.56245 | -2859.52597 | -2859.63548 | -                     |
| <b>G10-Cu-IM1</b>           | 0.61669            | 0.66750            | 0.52436            | -3541.62925 | -3541.57843 | -3541.72158 | -                     |
| <b>G10-Cu-TS1</b>           | 0.61655            | 0.66657            | 0.52708            | -3541.58912 | -3541.53910 | -3541.67859 | 323 <i>i</i>          |
| <b>G10-Cu-IM2</b>           | 0.61769            | 0.66761            | 0.52690            | -3541.60481 | -3541.55489 | -3541.69560 | -                     |
| <b>G10-Cu-TS2</b>           | 0.63234            | 0.68537            | 0.53892            | -3729.97168 | -3729.91866 | -3730.06511 | 136 <i>i</i>          |
| <b>G10-Cu-IM3</b>           | 0.63578            | 0.68811            | 0.54320            | -3729.98189 | -3729.92956 | -3730.07447 | -                     |
| <b>G10-Cu-TS3</b>           | 0.63416            | 0.68676            | 0.53983            | -3729.96012 | -3729.90752 | -3730.05445 | 334 <i>i</i>          |
| <b>G10-Cu-IM4</b>           | 0.63839            | 0.69012            | 0.54777            | -3730.00825 | -3729.95652 | -3730.09887 | -□                    |

<sup>a</sup> Zero-point correction energy;

<sup>b</sup> Thermal correction to enthalpy;

<sup>c</sup> Thermal correction to Gibbs free energy;

<sup>d</sup> Imaginary frequencies ( $\text{cm}^{-1}$ ) for the transition states.

**Table S7** The corrected electronic energies ( $E_{ZPE}$ ), enthalpies ( $H$ ), and Gibbs free energies ( $G$ ) for all stationary points (in Hartree) in the catalytic reaction using different guanidine catalysts, obtained at the M062X-D3/def2-SVP theoretical level. Single-point calculations were run at the M062X-D3/def2-TZVP theoretical level.

| Structure     | <sup>a</sup> ZPE | <sup>b</sup> H <sub>c</sub> | <sup>c</sup> G <sub>c</sub> | $E_{ZEP}$   | $H$         | $G$         | <sup>d</sup> G | <sup>e</sup> IF |
|---------------|------------------|-----------------------------|-----------------------------|-------------|-------------|-------------|----------------|-----------------|
| <b>G1</b>     | 0.32695          | 0.35035                     | 0.27047                     | -671.17037  | -671.14696  | -671.22685  | -671.97522     | -               |
| <b>G1-TS1</b> | 0.46666          | 0.50340                     | 0.38987                     | -1353.13834 | -1353.10160 | -1353.21513 | -1354.40543    | 424 <i>i</i>    |
| <b>G2</b>     | 0.32576          | 0.35145                     | 0.26604                     | -763.32005  | -763.29436  | -763.37977  | -764.23359     | -               |
| <b>G2-TS1</b> | 0.46576          | 0.50448                     | 0.38743                     | -1445.29827 | -1445.25954 | -1445.37659 | -1446.67211    | 439 <i>i</i>    |
| <b>G3</b>     | 0.40953          | 0.43947                     | 0.34405                     | -788.89228  | -788.86233  | -788.95776  | -789.83670     | -               |
| <b>G3-TS1</b> | 0.55013          | 0.59290                     | 0.46737                     | -1470.86200 | -1470.81923 | -1470.94476 | -1472.26492    | 392 <i>i</i>    |
| <b>G4</b>     | 0.55351          | 0.59321                     | 0.47508                     | -1110.47157 | -1110.43188 | -1110.55001 | -1111.79252    | -               |
| <b>G4-TS1</b> | 0.69394          | 0.74671                     | 0.59653                     | -1792.43756 | -1792.38479 | -1792.53497 | -1794.21961    | 416 <i>i</i>    |
| <b>G5</b>     | 0.14863          | 0.15804                     | 0.11252                     | -359.61212  | -359.60271  | -359.64823  | -360.05520     | -               |
| <b>G5-TS1</b> | 0.28742          | 0.31030                     | 0.22701                     | -1041.57802 | -1041.55515 | -1041.63843 | -1042.48664    | 386 <i>i</i>    |
| <b>G6</b>     | 0.17795          | 0.18875                     | 0.13992                     | -398.85947  | -398.84867  | -398.89749  | -399.34676     | -               |
| <b>G6-TS1</b> | 0.31717          | 0.34126                     | 0.25811                     | -1080.82282 | -1080.79873 | -1080.88188 | -1081.77445    | 361 <i>i</i>    |
| <b>G7</b>     | 0.20730          | 0.21951                     | 0.16750                     | -438.09272  | -438.08051  | -438.13252  | -438.62474     | -               |
| <b>G7-TS1</b> | 0.34629          | 0.37211                     | 0.28398                     | -1120.05144 | -1120.02562 | -1120.11376 | -1121.04938    | 357 <i>i</i>    |
| <b>G8</b>     | 0.20700          | 0.21943                     | 0.16655                     | -438.09750  | -438.08507  | -438.13795  | -438.62834     | -               |
| <b>G8-TS1</b> | 0.34634          | 0.37190                     | 0.28552                     | -1120.05700 | -1120.03144 | -1120.11782 | -1121.05188    | 352 <i>i</i>    |
| <b>G9</b>     | 0.23599          | 0.24975                     | 0.19420                     | -477.32653  | -477.31277  | -477.36831  | -477.90192     | -               |
| <b>G9-TS1</b> | 0.37502          | 0.40224                     | 0.31183                     | -1159.28631 | -1159.25909 | -1159.34950 | -1160.32566    | 356 <i>i</i>    |

<sup>a</sup> Zero-point correction energy;

<sup>b</sup> Thermal correction to enthalpy;

<sup>c</sup> Thermal correction to Gibbs free energy;

<sup>d</sup> Gibbs free energy obtained at the M062X-D3/def2-TZVP//M062X-D3/def2-SVP theoretical level;

<sup>e</sup> Imaginary frequencies (cm<sup>-1</sup>) for the transition states.

**Table S8** Comparison of energy barrier (kcal mol<sup>-1</sup>) for the uncatalyzed reaction using different computational levels.

| Epoxide       | Computational level | C <sub>1</sub> -O cleavage | C <sub>2</sub> -O cleavage |
|---------------|---------------------|----------------------------|----------------------------|
| Styrene oxide | B3LYP/6-31G**       | 56.3(44.6 <sup>[1]</sup> ) | 68.9(59.7 <sup>[1]</sup> ) |
|               | ωB97XD/6-31G**      | 61.1                       | 71.8(70.7 <sup>[2]</sup> ) |
|               | M062X-D3/def2-SVP   | 64.9                       | 76.8                       |

[1] V. Butera, N. Russo, U. Cosentino, C. Greco, G. Moro, D. Pitea and E. Sicilia, *ChemCatChem*, **2016**, *8*, 1167-1175.

[2] S. Marmitt and P. F. B. Gonçalves, *J. Comput. Chem.*, **2015**, *36*, 1322-1333.

**Table S9** Comparison of three tetramethylammonium halides (X=Cl, Br, I).

| Co-catalyst | N...X(Å) distance | Charge on X <sup>-</sup> | Global nucleophilic index <i>N</i> (eV) <sup>a</sup> |
|-------------|-------------------|--------------------------|------------------------------------------------------|
| <b>TMAI</b> | 3.978             | -0.889                   | 4.9                                                  |
| <b>TMAB</b> | 3.699             | -0.880                   | 4.4                                                  |
| <b>TMAC</b> | 3.478             | -0.873                   | 4.0                                                  |

<sup>a</sup> Global nucleophilic index *N* (eV) was obtained based on the reference of *Journal of Molecular Structure: THEOCHEM*, 2008, 865, 68-72.

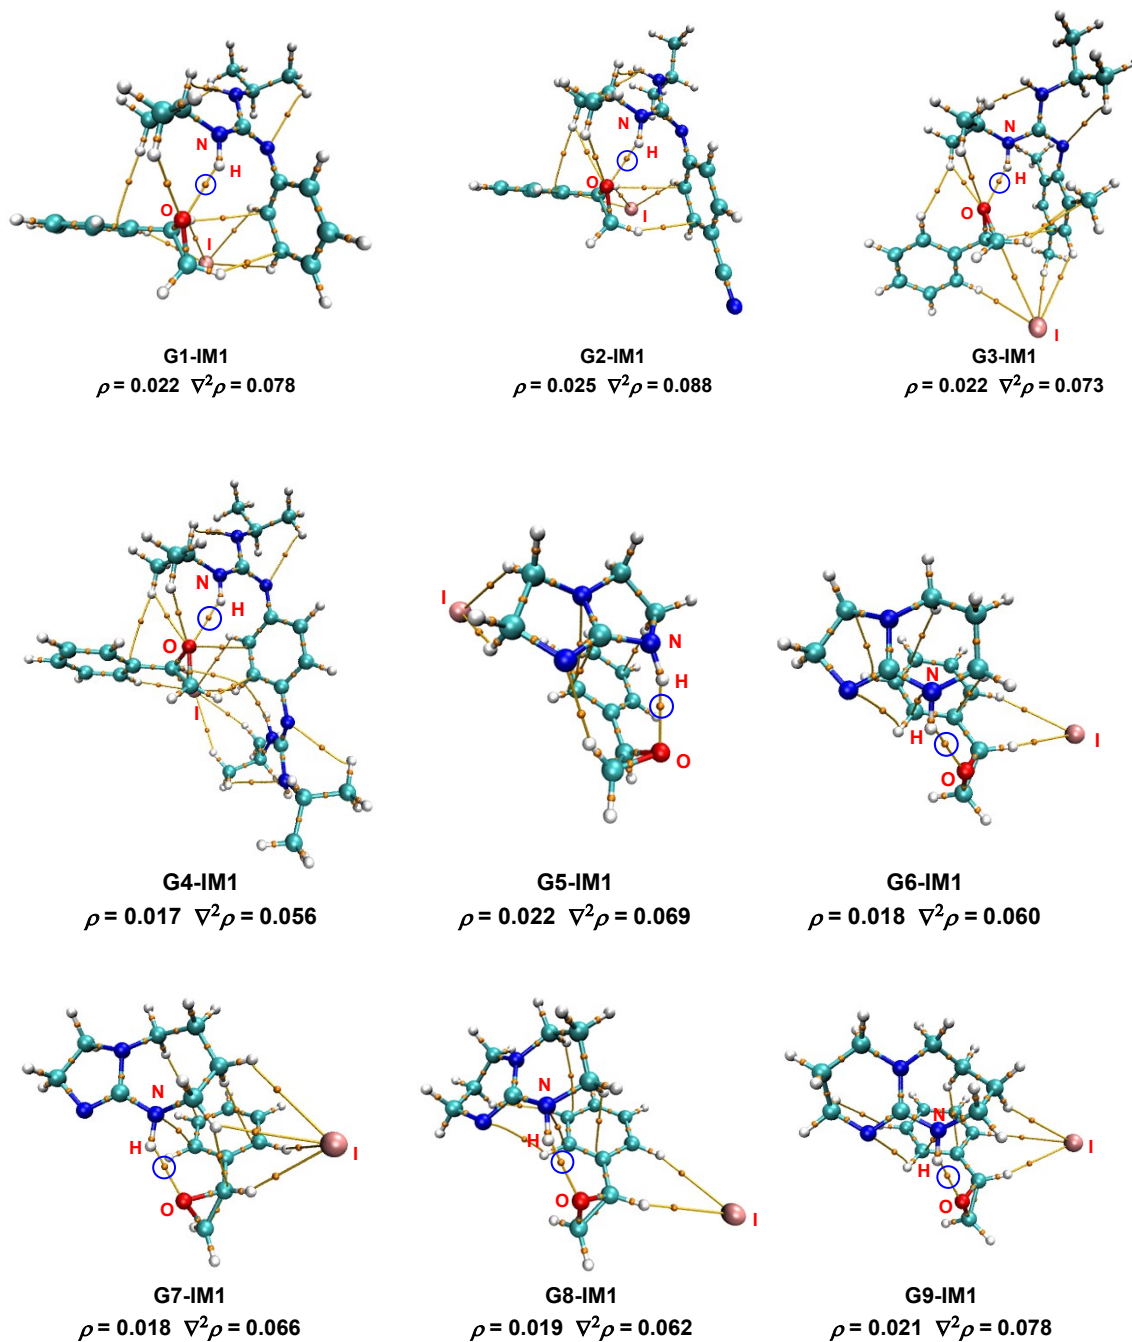



**Figure S1** Laplacian ( $\nabla^2\rho$ ) and charge density ( $\rho$ ) on (3, -1) bond critical points (BCP) for **G1-IM1**~**G9-IM1**, obtained by AIM analysis.

### Study on solvent effect

The solvent effect was studied at the M062X-D3/def2-TZVP//M062X-D3/def2-SVP (PCM-styrene oxide) level, in which the dielectric constant ( $\epsilon$ ) of styrene oxide was evaluated using the equation (1) in the *J. Phys. Chem. C*, 2019, **123**, 6395-6406:

$$\epsilon = \frac{2N\alpha + 3\epsilon_0}{3\epsilon_0 - N\alpha} \quad (1)$$

where  $N$  is number density of molecule ( $1/\text{m}^3$ ), obtained by molecular dynamics simulation.  $\alpha$  is molecular polarizability ( $\text{C}\cdot\text{m}^2/\text{V}$ ), and  $\epsilon_0$  is dielectric constant of vacuum ( $8.854187817 \times 10^{-12}$  F/m). The calculated dielectric constant ( $\epsilon$ ) of styrene oxide was 2.19.

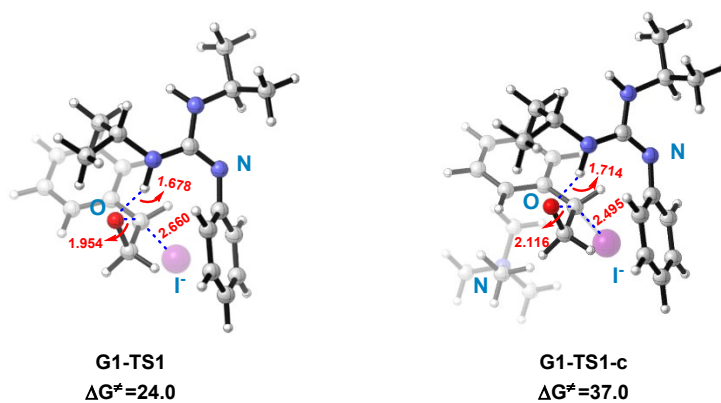

**Figure S2** Optimized geometries of **G1-TS1** and **G1-TS1-c**, and the activation barriers ( $\text{kcal mol}^{-1}$ ) in the ring-opening step.

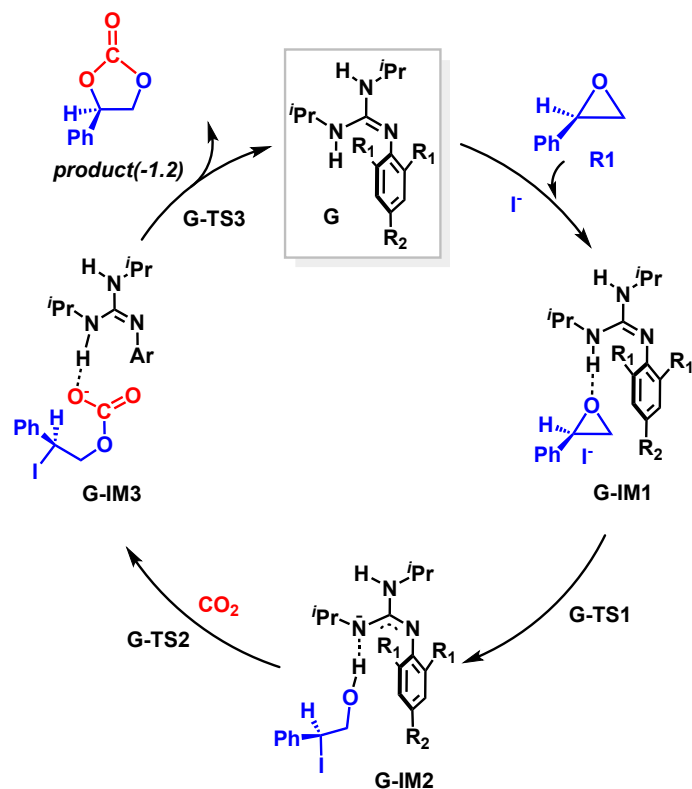

**Figure S3** Catalytic cycle for TOF calculation.

### Cartesian Coordinates of all Optimized Geometries

#### $\text{CO}_2$

|   |            |            |             |
|---|------------|------------|-------------|
| C | 0.00000000 | 0.00000000 | 0.00000000  |
| O | 0.00000000 | 0.00000000 | 1.15613600  |
| O | 0.00000000 | 0.00000000 | -1.15613600 |

#### **R1**

|   |             |             |             |
|---|-------------|-------------|-------------|
| C | 2.56453400  | -0.04149900 | 0.74726700  |
| H | 3.48797400  | -0.59026800 | 0.96091800  |
| C | 1.60680500  | -0.57047700 | -0.24250300 |
| H | 1.85937000  | -1.51417800 | -0.74124900 |
| O | 2.46232600  | 0.50424700  | -0.54418100 |
| C | 0.14958500  | -0.26791900 | -0.13783600 |
| C | -0.29185800 | 1.05765200  | -0.09751200 |
| C | -0.78224600 | -1.30643500 | -0.06427900 |
| C | -1.65051300 | 1.33858100  | 0.02964000  |
| H | 0.44427900  | 1.85885200  | -0.18498800 |
| C | -2.14081200 | -1.02385000 | 0.06455600  |
| H | -0.44082700 | -2.34334800 | -0.10980300 |
| C | -2.57762400 | 0.29961100  | 0.11397400  |
| H | -1.98963800 | 2.37547800  | 0.05617200  |
| H | -2.86200900 | -1.84061300 | 0.12293200  |

|   |             |            |            |
|---|-------------|------------|------------|
| H | -3.64153200 | 0.52057600 | 0.21172300 |
| H | 2.17655000  | 0.58554000 | 1.55790900 |

**Product**

|   |             |             |             |
|---|-------------|-------------|-------------|
| C | 1.26822200  | -1.22405400 | 0.74972700  |
| H | 1.25387400  | -2.31948800 | 0.72178000  |
| C | 0.61043700  | -0.56900000 | -0.47517600 |
| H | 0.69794200  | -1.22473000 | -1.35763100 |
| O | 2.60419500  | -0.76215400 | 0.66605100  |
| C | -0.82675500 | -0.18024600 | -0.26537500 |
| C | -1.17208000 | 1.10228700  | 0.16514300  |
| C | -1.82502700 | -1.14029600 | -0.45255200 |
| C | -2.50802000 | 1.41714100  | 0.40948000  |
| H | -0.39186600 | 1.85425300  | 0.28969700  |
| C | -3.15824300 | -0.82579300 | -0.19884000 |
| H | -1.55862000 | -2.14012500 | -0.80522800 |
| C | -3.50166000 | 0.45491300  | 0.23290500  |
| H | -2.77452400 | 2.42334500  | 0.73631100  |
| H | -3.93183900 | -1.58062700 | -0.34663400 |
| H | -4.54603500 | 0.70472800  | 0.42526300  |
| H | 0.80996200  | -0.86769600 | 1.68536100  |
| C | 2.65198800  | 0.35647900  | -0.08753600 |
| O | 1.44926600  | 0.56002800  | -0.67372700 |
| O | 3.59753100  | 1.05234600  | -0.21927000 |

**B-1-TS**

|   |             |             |             |
|---|-------------|-------------|-------------|
| C | -1.50171400 | 0.96332400  | 1.17888800  |
| H | -1.73894500 | 1.86108600  | 1.77491200  |
| C | -0.35885000 | 1.24216700  | 0.28509500  |
| H | -0.53701800 | 2.10286300  | -0.37039200 |
| O | -2.50102900 | 0.75909000  | 0.23804800  |
| C | 0.85080800  | 0.54829200  | 0.11168700  |
| C | 1.14212300  | -0.65249300 | 0.81257200  |
| C | 1.82569100  | 1.11388300  | -0.75146600 |
| C | 2.39218200  | -1.23012800 | 0.68235800  |
| H | 0.34816000  | -1.13604100 | 1.37949300  |
| C | 3.07358800  | 0.52911600  | -0.87026300 |
| H | 1.58084400  | 2.02126500  | -1.30717100 |
| C | 3.35104900  | -0.63985700 | -0.15105100 |
| H | 2.62223900  | -2.15835200 | 1.20506300  |
| H | 3.82874500  | 0.96287900  | -1.52546900 |
| H | 4.33051500  | -1.11086900 | -0.25677100 |
| H | -1.33482800 | 0.10799700  | 1.84824300  |
| C | -2.46100100 | -0.62877900 | -0.43063600 |

|   |             |             |             |
|---|-------------|-------------|-------------|
| O | -1.42997000 | -1.22776000 | -0.13434000 |
| O | -3.44187200 | -0.79682700 | -1.09758500 |

**B-2-TS**

|   |             |             |             |
|---|-------------|-------------|-------------|
| C | -0.69833000 | -1.03895200 | 0.86303100  |
| C | -1.48601000 | -1.79205400 | -0.10208900 |
| O | -1.81955700 | -0.17477000 | 0.89737300  |
| H | -0.62019600 | -1.52229800 | 1.85010200  |
| H | -2.35872400 | -2.31861500 | 0.28661800  |
| H | -1.19760900 | -1.95501500 | -1.13809200 |
| C | 0.61129000  | -0.44179300 | 0.42674200  |
| C | 1.59313000  | -1.26205200 | -0.13196100 |
| C | 0.86004800  | 0.91820000  | 0.62160900  |
| C | 2.82435100  | -0.72467100 | -0.49989000 |
| H | 1.39903200  | -2.32792500 | -0.28144000 |
| C | 2.09289300  | 1.45166500  | 0.24878700  |
| H | 0.07968500  | 1.55806700  | 1.03792200  |
| C | 3.07467800  | 0.63418700  | -0.30906100 |
| H | 3.58823900  | -1.36749200 | -0.93934900 |
| H | 2.28287800  | 2.51633900  | 0.39071700  |
| H | 4.03670600  | 1.05715900  | -0.60179800 |
| C | -2.04152900 | 0.74190800  | -0.41376200 |
| O | -1.96922300 | -0.02135800 | -1.36991400 |
| O | -2.23536100 | 1.87627300  | -0.13059900 |

**G1**

|   |             |             |             |
|---|-------------|-------------|-------------|
| C | -0.64913500 | -0.10127800 | 0.02292800  |
| N | 0.20001700  | -1.06904400 | -0.04489500 |
| C | 1.56827000  | -0.80771900 | -0.05739500 |
| C | 2.16997700  | -0.03220100 | -1.06822100 |
| C | 2.40000100  | -1.36684200 | 0.92737000  |
| C | 3.54569600  | 0.18368400  | -1.08053100 |
| H | 1.53799000  | 0.38145900  | -1.85736000 |
| C | 3.77496600  | -1.14810400 | 0.90953700  |
| H | 1.93752000  | -1.97993200 | 1.70212200  |
| C | 4.35811600  | -0.36961700 | -0.09082300 |
| H | 3.98891400  | 0.78288800  | -1.87852000 |
| H | 4.39966700  | -1.59316900 | 1.68641900  |
| H | 5.43583900  | -0.20282300 | -0.10371000 |
| N | -0.32734800 | 1.20214800  | 0.31520900  |
| H | 0.65821900  | 1.36496000  | 0.48726900  |
| N | -1.98509300 | -0.34014900 | -0.19871500 |
| H | -2.63139400 | 0.28401700  | 0.27089700  |
| C | -2.47548800 | -1.69518200 | -0.41846300 |

|   |             |             |             |
|---|-------------|-------------|-------------|
| H | -1.74440900 | -2.16940600 | -1.08782600 |
| C | -2.53170700 | -2.50140800 | 0.87713300  |
| H | -2.86502000 | -3.53116400 | 0.68182900  |
| H | -1.53445100 | -2.53732200 | 1.33433500  |
| H | -3.23937100 | -2.04327000 | 1.58708400  |
| C | -3.83112500 | -1.61978500 | -1.10889500 |
| H | -3.76139100 | -1.05909600 | -2.05100600 |
| H | -4.21120300 | -2.62752700 | -1.32575200 |
| H | -4.57043900 | -1.11914200 | -0.46183600 |
| C | -1.15077400 | 2.36873700  | 0.03404900  |
| H | -1.85147200 | 2.08833200  | -0.76914300 |
| C | -1.95213000 | 2.80959400  | 1.26033200  |
| H | -2.60046700 | 3.66552200  | 1.02278900  |
| H | -2.58394000 | 1.99463500  | 1.64368100  |
| H | -1.26822800 | 3.10357700  | 2.07036900  |
| C | -0.26142300 | 3.49585800  | -0.48004000 |
| H | 0.28821700  | 3.18188200  | -1.37813700 |
| H | -0.85936600 | 4.38360400  | -0.72697600 |
| H | 0.47027800  | 3.78686300  | 0.29038100  |

## G2

|   |             |             |             |
|---|-------------|-------------|-------------|
| C | -1.22585600 | -0.07597700 | -0.03744600 |
| N | -0.33518600 | -1.01461200 | 0.01519000  |
| C | 1.01779400  | -0.74157800 | -0.00756200 |
| C | 1.61669100  | 0.07447300  | -0.99409300 |
| C | 1.86241300  | -1.34857100 | 0.94377000  |
| C | 2.98726100  | 0.28644100  | -1.01483800 |
| H | 0.98405000  | 0.52781900  | -1.75917900 |
| C | 3.23226400  | -1.13692700 | 0.92776900  |
| H | 1.40612400  | -1.99456400 | 1.69413700  |
| C | 3.80999500  | -0.31272800 | -0.05015400 |
| H | 3.43476400  | 0.91420100  | -1.78667100 |
| H | 3.87088000  | -1.61013700 | 1.67471100  |
| N | -2.53327400 | -0.39877500 | -0.27899700 |
| H | -3.23931300 | 0.25316400  | 0.03943500  |
| N | -0.95641200 | 1.25560400  | 0.13209500  |
| H | -0.00766100 | 1.47710500  | 0.41171200  |
| C | -1.89992000 | 2.35581500  | 0.02868500  |
| H | -2.61628400 | 2.09477000  | -0.76775600 |
| C | -2.66128200 | 2.59157900  | 1.33577600  |
| H | -3.40764000 | 3.39057300  | 1.21942500  |
| H | -3.17935500 | 1.68193000  | 1.67437000  |
| H | -1.95909200 | 2.88552400  | 2.13010700  |
| C | -1.14902700 | 3.60840200  | -0.40859000 |

|   |             |             |             |
|---|-------------|-------------|-------------|
| H | -0.63863600 | 3.44375800  | -1.36714300 |
| H | -1.83940600 | 4.45535200  | -0.51824900 |
| H | -0.39469800 | 3.88511500  | 0.34500600  |
| C | -2.96120100 | -1.78628300 | -0.41604800 |
| H | -2.16765900 | -2.28672700 | -0.98748700 |
| C | -3.08469200 | -2.47684100 | 0.93989700  |
| H | -3.36084600 | -3.53385700 | 0.81536200  |
| H | -2.12442600 | -2.42660100 | 1.46955400  |
| H | -3.86114200 | -1.99063700 | 1.55220900  |
| C | -4.26326600 | -1.82189600 | -1.20566100 |
| H | -4.14030300 | -1.34350600 | -2.18693900 |
| H | -4.59241700 | -2.85854700 | -1.35910900 |
| H | -5.06527600 | -1.29689400 | -0.66084500 |
| C | 5.23071000  | -0.08831500 | -0.06711200 |
| N | 6.37159100  | 0.09586700  | -0.07957500 |

**G3**

|   |             |             |             |
|---|-------------|-------------|-------------|
| C | 1.13059900  | 0.01138000  | -0.28392200 |
| N | 0.29491800  | -0.96809300 | -0.25215500 |
| C | -1.07476000 | -0.69654300 | -0.15182400 |
| C | -1.71948400 | -0.83407300 | 1.09331000  |
| C | -1.82450300 | -0.33604600 | -1.29132800 |
| C | -3.09528200 | -0.61154500 | 1.17964100  |
| C | -3.19804100 | -0.12409600 | -1.16205100 |
| C | -3.85619700 | -0.25308800 | 0.06434600  |
| H | -3.58748200 | -0.72705300 | 2.14980900  |
| H | -3.77409400 | 0.14549200  | -2.05235900 |
| N | 2.47017400  | -0.23515600 | -0.45761100 |
| H | 3.11747500  | 0.50428100  | -0.22052800 |
| N | 0.76106500  | 1.33835000  | -0.20646500 |
| H | -0.21667600 | 1.46960200  | 0.03755200  |
| C | 1.65101300  | 2.44096400  | 0.11569700  |
| H | 2.51514900  | 2.38378800  | -0.56843400 |
| C | 0.92640900  | 3.74907200  | -0.17741400 |
| H | 0.60175100  | 3.78713700  | -1.22573500 |
| H | 0.03690900  | 3.84181000  | 0.46571300  |
| H | 1.57910700  | 4.60875200  | 0.02502500  |
| C | 2.14608200  | 2.38782000  | 1.56375600  |
| H | 2.86507500  | 3.19438800  | 1.76865600  |
| H | 1.29494000  | 2.49923000  | 2.25265000  |
| H | 2.63095100  | 1.42514000  | 1.78446800  |
| C | 2.99318800  | -1.59172700 | -0.37554200 |
| H | 2.28419600  | -2.21988500 | -0.93222000 |
| C | 4.35752300  | -1.63691600 | -1.04980100 |

|   |             |             |             |
|---|-------------|-------------|-------------|
| H | 4.76095200  | -2.65856000 | -1.03549000 |
| H | 4.29092300  | -1.29883900 | -2.09286500 |
| H | 5.07586700  | -0.98952100 | -0.51978500 |
| C | 3.04544000  | -2.08999200 | 1.06762900  |
| H | 2.04567400  | -2.02491600 | 1.51790900  |
| H | 3.38004200  | -3.13672900 | 1.11198100  |
| H | 3.74717400  | -1.48107000 | 1.66094500  |
| C | -5.33532800 | 0.01254100  | 0.18154100  |
| H | -5.53715800 | 1.08676700  | 0.31876000  |
| H | -5.87110300 | -0.30812000 | -0.72278100 |
| H | -5.76855900 | -0.51679300 | 1.04113100  |
| C | -0.90544800 | -1.22941700 | 2.29493400  |
| H | -1.53169600 | -1.30558300 | 3.19345200  |
| H | -0.40983800 | -2.19670000 | 2.12109000  |
| H | -0.10369900 | -0.49911300 | 2.48991400  |
| C | -1.12607200 | -0.20245400 | -2.61698900 |
| H | -0.40653000 | 0.63153900  | -2.59891200 |
| H | -0.54903100 | -1.11192800 | -2.84030600 |
| H | -1.84424900 | -0.02410500 | -3.42791800 |

#### **G4**

|   |             |             |             |
|---|-------------|-------------|-------------|
| C | -3.57995200 | 0.01172600  | 0.07457300  |
| N | -2.71790200 | 0.69399100  | -0.59218500 |
| C | -1.36562300 | 0.34385500  | -0.60961800 |
| C | -0.57225100 | 0.31044600  | 0.55071800  |
| C | -0.73496900 | 0.06346100  | -1.83355200 |
| C | 0.78418100  | -0.00350000 | 0.48768700  |
| H | -1.03497900 | 0.53717600  | 1.51433300  |
| C | 0.61699200  | -0.25109000 | -1.89617600 |
| H | -1.34024500 | 0.09838700  | -2.74075800 |
| C | 1.41025700  | -0.28672300 | -0.73757600 |
| H | 1.37881300  | -0.04675000 | 1.40367600  |
| H | 1.09249500  | -0.47773900 | -2.85169900 |
| N | -4.91410100 | 0.34716200  | 0.00678200  |
| H | -5.47460600 | 0.07127400  | 0.80491200  |
| N | -3.29510000 | -1.08413100 | 0.87091000  |
| H | -2.32235400 | -1.37005700 | 0.79452700  |
| C | -4.21902500 | -2.20104100 | 1.05229700  |
| H | -5.15340800 | -1.81049900 | 1.48873800  |
| C | -4.55107300 | -2.90363900 | -0.26329900 |
| H | -5.26934900 | -3.72103000 | -0.10356800 |
| H | -4.98470300 | -2.19070800 | -0.97774500 |
| H | -3.63532600 | -3.32698600 | -0.70417100 |
| C | -3.60866000 | -3.15809500 | 2.06847700  |

|   |             |             |             |
|---|-------------|-------------|-------------|
| H | -3.38708700 | -2.63636400 | 3.00929700  |
| H | -4.29217000 | -3.99224700 | 2.27626900  |
| H | -2.66963200 | -3.58126100 | 1.67719500  |
| C | -5.34122000 | 1.56593200  | -0.66699900 |
| H | -4.76582800 | 1.60307900  | -1.60244200 |
| C | -6.82755400 | 1.45750400  | -0.98169500 |
| H | -7.17197300 | 2.34508100  | -1.53016900 |
| H | -7.03713800 | 0.56589800  | -1.58844600 |
| H | -7.41919000 | 1.39143000  | -0.05356300 |
| C | -5.01450100 | 2.81859800  | 0.14387200  |
| H | -3.93554700 | 2.86208200  | 0.34135800  |
| H | -5.30621300 | 3.72620500  | -0.40474300 |
| H | -5.55780900 | 2.80937400  | 1.10262700  |
| C | 3.67538900  | 0.18060800  | -0.44973400 |
| N | 2.76008700  | -0.64388200 | -0.81550000 |
| N | 4.98170600  | -0.24077200 | -0.34762000 |
| H | 5.67322900  | 0.47270200  | -0.54416000 |
| N | 3.48024700  | 1.52305900  | -0.16808200 |
| H | 2.49871200  | 1.78229600  | -0.21836100 |
| C | 4.20815900  | 2.21031100  | 0.89718900  |
| H | 5.28534200  | 2.15106200  | 0.67199700  |
| C | 3.80980400  | 3.67995200  | 0.87584800  |
| H | 4.36596400  | 4.24482900  | 1.63609800  |
| H | 4.00391300  | 4.12259500  | -0.11043000 |
| H | 2.73543200  | 3.78585500  | 1.09638000  |
| C | 3.96669500  | 1.57506800  | 2.26572000  |
| H | 4.24006800  | 0.50996100  | 2.24575500  |
| H | 4.56337000  | 2.07314900  | 3.04386000  |
| H | 2.90376100  | 1.66151100  | 2.54016500  |
| C | 5.34610600  | -1.60683000 | -0.71139200 |
| H | 4.77534700  | -1.88776800 | -1.61232900 |
| C | 6.83715800  | -1.64788200 | -1.01640300 |
| H | 7.14339500  | -2.66598200 | -1.29166200 |
| H | 7.09400700  | -0.97889100 | -1.85152200 |
| H | 7.42017800  | -1.34532800 | -0.13215600 |
| C | 4.97325100  | -2.57520600 | 0.40652800  |
| H | 3.89754000  | -2.51038000 | 0.61361800  |
| H | 5.20914600  | -3.60936500 | 0.11561900  |
| H | 5.53330100  | -2.33129800 | 1.32257800  |

**G5**

|   |             |             |             |
|---|-------------|-------------|-------------|
| N | -1.26430500 | -0.34868000 | -0.08828500 |
| N | 0.48049800  | -1.41490200 | 0.84530300  |
| C | 0.10319000  | -0.43943100 | -0.08187400 |



|   |             |             |             |
|---|-------------|-------------|-------------|
| C | -0.67481300 | -2.24609800 | 1.10543400  |
| H | -0.77860900 | -3.05076300 | 0.34966800  |
| H | -0.65728500 | -2.70002200 | 2.10530700  |
| C | 1.79577300  | -1.83892600 | 0.39940800  |
| H | 2.45374600  | -2.12466500 | 1.23090900  |
| H | 1.71646900  | -2.69207200 | -0.30435500 |
| C | -1.80629700 | -1.21129700 | 0.95137500  |
| H | -2.75429000 | -1.67451600 | 0.64650000  |
| H | -1.96511500 | -0.67489400 | 1.90379300  |
| N | 1.01450200  | 0.10751000  | -0.78166500 |
| C | 2.24883900  | -0.54635300 | -0.33414800 |
| H | 2.91545900  | -0.76187200 | -1.18074000 |
| H | 2.80116300  | 0.11243800  | 0.35939500  |
| H | -1.71368300 | 0.50901800  | -0.37746200 |

**G6**

|   |             |             |             |
|---|-------------|-------------|-------------|
| N | 0.94383700  | -0.24291200 | 0.06193600  |
| C | -0.07178300 | 0.24546300  | 0.84279600  |
| C | 2.27690200  | -0.39566400 | 0.61557700  |
| H | 2.81724900  | 0.57003400  | 0.66842400  |
| H | 2.85733500  | -1.05926200 | -0.04048400 |
| N | -1.10808900 | 0.85376500  | 0.40357900  |
| N | -0.01712300 | 0.00963400  | 2.21905200  |
| C | -1.96266100 | 1.06846100  | 1.56584000  |
| H | -2.42569200 | 2.06498000  | 1.54743900  |
| H | -2.78216900 | 0.32753800  | 1.57501400  |
| C | -1.04378500 | 0.86845800  | 2.78857900  |
| H | -1.54177700 | 0.39691600  | 3.64768500  |
| H | -0.60020500 | 1.82811400  | 3.12452200  |
| C | 1.26098700  | -0.13429200 | 2.87880600  |
| H | 1.10775000  | -0.60201200 | 3.86322200  |
| H | 1.73005300  | 0.85716200  | 3.05919700  |
| C | 2.17600400  | -0.99172400 | 2.01389000  |
| H | 3.17397800  | -1.05977300 | 2.46853200  |
| H | 1.75828900  | -2.00718200 | 1.94479500  |
| H | 0.86409700  | 0.05089800  | -0.90400700 |

**G7**

|   |            |            |             |
|---|------------|------------|-------------|
| N | 5.54924700 | 8.63447900 | 0.22394400  |
| C | 5.82571100 | 8.56554100 | -1.12479000 |
| N | 5.62456000 | 7.36103600 | -1.80488200 |
| C | 5.93352500 | 7.55113300 | 1.12223500  |
| H | 5.98117900 | 7.98263100 | 2.13129200  |
| H | 6.94578700 | 7.17125800 | 0.88731700  |

|   |            |            |             |
|---|------------|------------|-------------|
| C | 4.93985100 | 6.39607100 | 1.12790100  |
| H | 3.93863000 | 6.80696300 | 1.33643100  |
| H | 5.19429400 | 5.71869700 | 1.95795600  |
| C | 6.40185000 | 9.08332100 | -3.17588000 |
| H | 7.47442100 | 8.95506500 | -3.40509900 |
| H | 6.00227600 | 9.80160900 | -3.90647900 |
| C | 4.57168200 | 6.43829800 | -1.40616700 |
| H | 4.42319100 | 5.75491200 | -2.25427600 |
| H | 3.61288700 | 6.97371200 | -1.25177800 |
| C | 5.66526900 | 7.73107100 | -3.22001400 |
| H | 6.17116400 | 6.96576600 | -3.82567500 |
| H | 4.63372200 | 7.85243500 | -3.60456100 |
| C | 4.91221700 | 5.60610900 | -0.17530200 |
| H | 5.89263800 | 5.13174500 | -0.34577300 |
| H | 4.17122500 | 4.79613400 | -0.09072900 |
| N | 6.25106400 | 9.55987800 | -1.80824900 |
| H | 5.79358600 | 9.55915700 | 0.56135800  |

**G8**

|   |            |             |             |
|---|------------|-------------|-------------|
| N | 3.01165700 | 12.47224800 | 1.80511800  |
| N | 3.81169900 | 10.37875100 | 2.59677200  |
| C | 3.95566200 | 13.24687300 | 2.59383300  |
| H | 3.45496200 | 13.65522700 | 3.49203100  |
| H | 4.27974500 | 14.11062900 | 1.98891800  |
| C | 5.15416800 | 12.40231500 | 2.99541100  |
| H | 5.78228000 | 12.21441900 | 2.11027000  |
| H | 5.76393200 | 12.94390000 | 3.73271400  |
| C | 4.65792500 | 11.06652800 | 3.53963400  |
| H | 5.51131700 | 10.41901000 | 3.79267300  |
| H | 4.11733200 | 11.24317600 | 4.49069100  |
| C | 3.06232800 | 11.08872800 | 1.83692400  |
| N | 2.18788500 | 10.43433800 | 0.98727300  |
| H | 2.38808000 | 9.44302000  | 0.94586600  |
| C | 2.17429400 | 13.24428800 | 0.90580100  |
| H | 2.79085800 | 13.66173000 | 0.08454000  |
| H | 1.76787600 | 14.10661400 | 1.46143300  |
| C | 1.03981300 | 12.41919500 | 0.32122000  |
| H | 0.27771500 | 12.22748200 | 1.09108600  |
| H | 0.56786500 | 12.97337100 | -0.50203200 |
| C | 1.59350800 | 11.08566000 | -0.15232600 |
| H | 0.78794900 | 10.44864400 | -0.54310700 |
| H | 2.31215000 | 11.25335300 | -0.98054300 |

**G9**

|   |             |             |             |
|---|-------------|-------------|-------------|
| N | -1.54579300 | -0.06545400 | -0.01962600 |
| N | -1.57738000 | 0.04732600  | 2.26570800  |
| C | -1.76322800 | 0.64432700  | 1.02571900  |
| N | -2.18632700 | 1.96569600  | 1.02858600  |
| C | -1.67383400 | 0.59538000  | -1.29549500 |
| H | -1.76576500 | -0.16490500 | -2.08486300 |
| H | -0.76637000 | 1.18575400  | -1.53417000 |
| C | -2.88526700 | 1.52206700  | -1.29399100 |
| H | -3.78463000 | 0.92074700  | -1.08885000 |
| H | -3.03025700 | 2.02708100  | -2.25982700 |
| C | -2.68940900 | 2.55947400  | -0.20226800 |
| H | -3.63839000 | 3.08014500  | 0.01921900  |
| H | -1.97859400 | 3.33528400  | -0.54660900 |
| C | -2.08030600 | 2.93520900  | 2.11345900  |
| H | -3.09344800 | 3.19498200  | 2.48178300  |
| H | -1.67731800 | 3.86057400  | 1.66502400  |
| C | -1.19238400 | 2.55856500  | 3.29406400  |
| H | -0.97824000 | 3.47839100  | 3.85802500  |
| H | -0.23236800 | 2.18646600  | 2.90896200  |
| C | -1.81591600 | 1.51364800  | 4.21796600  |
| H | -1.04101000 | 1.11225300  | 4.88838600  |
| H | -2.59179700 | 1.96985800  | 4.85360400  |
| C | -2.43097200 | 0.38643700  | 3.38860200  |
| H | -2.57938000 | -0.51190300 | 4.00326300  |
| H | -3.43014500 | 0.69166200  | 3.02967900  |
| H | -1.35609700 | -0.93180600 | 2.13163400  |

### G10

|   |             |             |             |
|---|-------------|-------------|-------------|
| H | -4.31993300 | 1.19332600  | 2.18761600  |
| H | -2.59077100 | -2.38190100 | -0.53179700 |
| H | -1.93171700 | -2.75058200 | -2.89020300 |
| H | 0.43161900  | -2.35992500 | -0.00137700 |
| H | 2.82591000  | -0.70576000 | -1.11916300 |
| O | 1.16017600  | 0.31899000  | 1.35217200  |
| N | -2.22831500 | 0.49263400  | 0.69342600  |
| N | -1.49481900 | -0.73214300 | -1.22003900 |
| N | -0.52624000 | 1.32240400  | -0.63869000 |
| N | 2.54950800  | -0.63644800 | -0.14752200 |
| C | -1.47375500 | 0.32944100  | -0.31875100 |
| C | -0.60910800 | 2.52641500  | 0.19499200  |
| C | 1.67901000  | 2.01916500  | -1.52314200 |
| C | 0.81454900  | 0.87073700  | -0.98337100 |
| C | 1.51083400  | 0.17305000  | 0.19996100  |
| C | 3.32460300  | -1.35033100 | 0.85930100  |

|   |             |             |             |
|---|-------------|-------------|-------------|
| C | -3.38395600 | -0.33378900 | 0.97856800  |
| C | -3.99109400 | 0.14865600  | 2.29317600  |
| C | -4.42279500 | -0.28801600 | -0.14473800 |
| C | -1.55801800 | -2.13831600 | -0.83649900 |
| C | -0.61746400 | -2.46347600 | 0.32229500  |
| C | -1.23756000 | -2.97597400 | -2.06772500 |
| C | 1.67499800  | 3.21414300  | -0.57857000 |
| C | 4.02119800  | -2.53643600 | 0.20795700  |
| H | 4.58194900  | -3.11067000 | 0.95744800  |
| H | 4.73891000  | -2.19507900 | -0.55590800 |
| H | 2.59432500  | -1.71446200 | 1.59947000  |
| H | -0.77415600 | -1.77487700 | 1.16539200  |
| H | -1.04463700 | -0.54580800 | -2.10606200 |
| H | 0.74834400  | 0.11691200  | -1.78171200 |
| H | -4.75783300 | 0.75042600  | -0.29037900 |
| H | -4.00592400 | -0.64648300 | -1.09608000 |
| H | -3.08224900 | -1.38830400 | 1.13261400  |
| H | -3.23805300 | 0.11240100  | 3.09185400  |
| C | 4.29833000  | -0.41682000 | 1.57301100  |
| H | -5.30016800 | -0.90048700 | 0.11143200  |
| H | -4.85450100 | -0.46735800 | 2.58571300  |
| H | -1.31218400 | -4.04684600 | -1.83632400 |
| H | -0.20907700 | -2.77457300 | -2.41067700 |
| H | -0.77511700 | -3.49454700 | 0.67136000  |
| C | 0.23334500  | 3.66041600  | -0.36914400 |
| H | 3.29476800  | -3.20947300 | -0.26991300 |
| H | 3.74501200  | 0.41356000  | 2.03186100  |
| H | 4.84106000  | -0.95255100 | 2.36526200  |
| H | 5.03305500  | -0.00872700 | 0.86152000  |
| H | 0.18121300  | 4.51515800  | 0.32085400  |
| H | -0.18713300 | 3.99206000  | -1.33364200 |
| H | -0.30273100 | 2.28720400  | 1.22602700  |
| H | -1.66668600 | 2.80979900  | 0.24170000  |
| H | 2.11881500  | 2.92668000  | 0.39011200  |
| H | 2.29041400  | 4.02704300  | -0.99130700 |
| H | 2.70036500  | 1.64884600  | -1.69934100 |
| H | 1.26606200  | 2.32475600  | -2.49787800 |

**G1-TS2-a**

|   |            |             |             |
|---|------------|-------------|-------------|
| C | 2.40971100 | -0.03481200 | 0.40117300  |
| N | 1.98354100 | -1.13105700 | -0.26843300 |
| C | 0.91525200 | -1.87083600 | 0.18145500  |
| C | 0.56055200 | -2.00303100 | 1.55044100  |
| C | 0.12179600 | -2.59523100 | -0.74353200 |

|   |             |             |             |
|---|-------------|-------------|-------------|
| C | -0.53115300 | -2.76706100 | 1.94581600  |
| H | 1.14196100  | -1.46628500 | 2.29860300  |
| C | -0.97271000 | -3.35090600 | -0.33370000 |
| H | 0.37717600  | -2.54317000 | -1.80080200 |
| C | -1.32514600 | -3.44015500 | 1.01340700  |
| H | -0.77440900 | -2.82462000 | 3.01030200  |
| H | -1.57130500 | -3.86723300 | -1.08804300 |
| H | -2.19678100 | -4.01613400 | 1.32759200  |
| N | 3.74943800  | 0.31366700  | 0.14615800  |
| H | 3.87948000  | 1.28455600  | -0.11064700 |
| N | 1.67121500  | 0.69708800  | 1.18753800  |
| H | -0.01328400 | 0.65073500  | 1.75774000  |
| C | 2.21846100  | 1.84044400  | 1.89241200  |
| H | 3.31146800  | 1.91624700  | 1.75074100  |
| C | 1.56853000  | 3.12134000  | 1.36135700  |
| H | 1.92166000  | 4.01012600  | 1.90942900  |
| H | 1.78945700  | 3.25294300  | 0.29113800  |
| H | 0.47505600  | 3.04220900  | 1.46767900  |
| C | 1.98021100  | 1.68731100  | 3.39823500  |
| H | 2.47945400  | 0.77799400  | 3.76612700  |
| H | 2.38423500  | 2.55244400  | 3.94859700  |
| H | 0.90402600  | 1.60065500  | 3.60304500  |
| C | 4.70900100  | -0.60996000 | -0.42539800 |
| H | 4.32487600  | -1.09104100 | -1.34121700 |
| C | 5.96237400  | 0.17379700  | -0.79551900 |
| H | 6.72870600  | -0.49344200 | -1.21494200 |
| H | 5.73102900  | 0.94412300  | -1.54753900 |
| H | 6.38004100  | 0.66869000  | 0.09560900  |
| C | 5.01918100  | -1.72791800 | 0.56647200  |
| H | 4.09318300  | -2.26348200 | 0.81566900  |
| H | 5.73323200  | -2.44671300 | 0.13540700  |
| H | 5.44660300  | -1.30470800 | 1.48893600  |
| C | -1.99140000 | 0.19147500  | 0.30119800  |
| H | -1.35304200 | -0.66109100 | 0.04394500  |
| C | -2.01123600 | 0.39522400  | 1.81657500  |
| H | -2.83903700 | 1.07550900  | 2.08658200  |
| H | -2.22630600 | -0.58636300 | 2.28170800  |
| O | -0.82434400 | 0.95548900  | 2.26241400  |
| C | -1.57706000 | 1.40504000  | -0.47453900 |
| C | -0.42268800 | 1.34182800  | -1.25839300 |
| C | -2.26353400 | 2.62072700  | -0.36814200 |
| C | 0.03493900  | 2.47066400  | -1.93863000 |
| H | 0.14412600  | 0.40936600  | -1.30485800 |
| C | -1.80527200 | 3.74920600  | -1.03976600 |

|   |             |             |             |
|---|-------------|-------------|-------------|
| H | -3.16906800 | 2.67255500  | 0.24202700  |
| C | -0.65567800 | 3.67532100  | -1.83124500 |
| H | 0.94552300  | 2.39123500  | -2.53433900 |
| H | -2.34656000 | 4.69310600  | -0.94840100 |
| H | -0.29768400 | 4.56253200  | -2.35778700 |
| I | -3.97067000 | -0.52730500 | -0.32731500 |
| C | 2.34112100  | -0.81918100 | -2.46096000 |
| O | 2.34816000  | -1.91641400 | -2.86907400 |
| O | 2.41378500  | 0.35202400  | -2.48506300 |

**G1-IM3-a**

|   |             |             |             |
|---|-------------|-------------|-------------|
| C | -2.40995600 | -0.77665000 | 0.15185500  |
| N | -1.51888000 | -0.07818900 | -0.69166900 |
| C | -1.26952500 | 1.26550100  | -0.41889400 |
| C | -1.56124400 | 1.79198600  | 0.85712000  |
| C | -0.75511300 | 2.14602100  | -1.39416400 |
| C | -1.36191100 | 3.14012800  | 1.13881600  |
| H | -1.93619400 | 1.12631400  | 1.63568000  |
| C | -0.56177000 | 3.48976300  | -1.09146800 |
| H | -0.49549400 | 1.74505900  | -2.37087500 |
| C | -0.86275400 | 4.00646200  | 0.16864500  |
| H | -1.59327400 | 3.51112300  | 2.13984500  |
| H | -0.15675100 | 4.14639800  | -1.86479800 |
| H | -0.69849800 | 5.06133500  | 0.39350800  |
| N | -3.73672400 | -0.48594900 | -0.00695700 |
| H | -4.37934800 | -1.01766700 | 0.56870700  |
| N | -1.92620100 | -1.56626400 | 1.03742900  |
| C | -2.78878400 | -2.31122300 | 1.92921400  |
| H | -3.69475600 | -2.66833200 | 1.39431100  |
| C | -2.02409000 | -3.53541900 | 2.42291300  |
| H | -2.61245400 | -4.10931400 | 3.15488300  |
| H | -1.77025000 | -4.18732200 | 1.57552800  |
| H | -1.07750400 | -3.21002900 | 2.87911200  |
| C | -3.22823400 | -1.42206600 | 3.09751200  |
| H | -3.75319700 | -0.52375800 | 2.73773700  |
| H | -3.89128400 | -1.96387600 | 3.78915500  |
| H | -2.33706000 | -1.09139200 | 3.65259600  |
| C | -4.32809700 | 0.10993900  | -1.19845800 |
| H | -3.49905300 | 0.54223500  | -1.77245900 |
| C | -4.99830800 | -0.95765000 | -2.05899400 |
| H | -5.44052800 | -0.50853100 | -2.96114000 |
| H | -4.23816300 | -1.69336300 | -2.35429400 |
| H | -5.80754400 | -1.45630600 | -1.49791900 |
| C | -5.28013300 | 1.22990500  | -0.78859700 |

|   |             |             |             |
|---|-------------|-------------|-------------|
| H | -4.74403800 | 1.98951900  | -0.20231300 |
| H | -5.72142200 | 1.71094500  | -1.67358800 |
| H | -6.10531100 | 0.83176500  | -0.17444700 |
| C | -1.14048300 | -0.82216100 | -1.94029800 |
| O | -1.90906900 | -1.75150100 | -2.18568300 |
| O | -0.13052900 | -0.39927500 | -2.50975900 |
| H | -0.21259600 | -1.91758700 | 1.10045700  |
| C | 1.83435600  | -0.20724600 | 0.21659700  |
| C | 1.22597000  | -0.71802300 | 1.52803800  |
| H | 2.00448400  | -0.71373000 | 2.31186000  |
| H | 0.43669900  | -0.00809400 | 1.84202300  |
| O | 0.73745000  | -2.00704200 | 1.36928200  |
| C | 2.90488100  | -1.09082400 | -0.35271200 |
| C | 2.73400900  | -1.61657100 | -1.63810900 |
| C | 4.03777100  | -1.44851500 | 0.38882900  |
| C | 3.68647500  | -2.49054000 | -2.16591900 |
| H | 1.84015900  | -1.33894200 | -2.20654000 |
| C | 4.98604900  | -2.31697600 | -0.14147500 |
| H | 4.17953200  | -1.02523600 | 1.38649900  |
| C | 4.81171600  | -2.84293700 | -1.42390300 |
| H | 3.54105800  | -2.90126900 | -3.16707300 |
| H | 5.86596600  | -2.58666900 | 0.44652400  |
| H | 5.55367300  | -3.52767400 | -1.84054100 |
| I | 2.61259900  | 1.81610200  | 0.60638400  |
| H | 1.06026100  | -0.03105300 | -0.54243300 |

### G1-TS3-a

|   |             |             |             |
|---|-------------|-------------|-------------|
| C | -2.65532600 | -0.41819300 | 0.17380100  |
| N | -1.61985600 | -0.11725000 | -0.72004400 |
| C | -1.11656500 | 1.18945400  | -0.79629900 |
| C | -1.20298600 | 2.06064700  | 0.29981500  |
| C | -0.50344500 | 1.64690600  | -1.97608300 |
| C | -0.68239600 | 3.35004400  | 0.22095800  |
| H | -1.65494100 | 1.70758400  | 1.22861900  |
| C | 0.02584800  | 2.93158900  | -2.03639200 |
| H | -0.40969900 | 0.96449300  | -2.81993100 |
| C | -0.06177800 | 3.79490600  | -0.94324300 |
| H | -0.73146500 | 3.99861900  | 1.09707500  |
| H | 0.51900300  | 3.26064300  | -2.95334900 |
| H | 0.36986400  | 4.79516700  | -0.99208800 |
| N | -3.80775100 | 0.31850700  | 0.01467600  |
| H | -4.55820000 | 0.08227300  | 0.65356800  |
| N | -2.45570900 | -1.31172700 | 1.06902500  |
| C | -3.52479800 | -1.77682300 | 1.92318600  |

|   |             |             |             |
|---|-------------|-------------|-------------|
| H | -4.49089700 | -1.78109100 | 1.37403300  |
| C | -3.21549100 | -3.21245600 | 2.33424700  |
| H | -3.99607000 | -3.61969500 | 2.99452700  |
| H | -3.13092500 | -3.84551700 | 1.44043800  |
| H | -2.24832500 | -3.24109800 | 2.85813700  |
| C | -3.66414100 | -0.86261100 | 3.14393800  |
| H | -3.88540500 | 0.17350200  | 2.84406300  |
| H | -4.46284900 | -1.21100200 | 3.81635900  |
| H | -2.71500400 | -0.85128300 | 3.70027800  |
| C | -4.24826600 | 0.79696400  | -1.29441100 |
| H | -3.41081800 | 1.35792900  | -1.73429500 |
| C | -4.60637000 | -0.36164800 | -2.22295300 |
| H | -4.86021800 | 0.00732100  | -3.22849300 |
| H | -3.75931600 | -1.06176100 | -2.29658600 |
| H | -5.47883700 | -0.90801900 | -1.82680400 |
| C | -5.40622000 | 1.76377300  | -1.08627900 |
| H | -5.10315300 | 2.60025900  | -0.44101600 |
| H | -5.74883900 | 2.16709900  | -2.04926600 |
| H | -6.26201700 | 1.25026100  | -0.61629300 |
| C | -0.98711400 | -1.26581900 | -1.43315700 |
| O | -1.74973300 | -2.16421300 | -1.74405300 |
| O | 0.24173700  | -1.13002200 | -1.63610600 |
| H | -0.81255400 | -2.07975100 | 0.93531900  |
| C | 1.50845700  | -0.44771700 | -0.05555400 |
| C | 0.76911100  | -1.00785200 | 1.16487600  |
| H | 1.52826800  | -1.10625500 | 1.95494200  |
| H | 0.05239800  | -0.24170700 | 1.50642300  |
| O | 0.15707400  | -2.24456100 | 0.96681700  |
| C | 2.63512600  | -1.16802100 | -0.65864200 |
| C | 3.39549700  | -0.54542900 | -1.65841800 |
| C | 2.92635900  | -2.48844700 | -0.29513800 |
| C | 4.44164700  | -1.22139700 | -2.27118800 |
| H | 3.16214400  | 0.48716800  | -1.92674700 |
| C | 3.97777800  | -3.16453000 | -0.91243800 |
| H | 2.29543500  | -2.98784900 | 0.44084400  |
| C | 4.73866100  | -2.53476500 | -1.89549100 |
| H | 5.03280500  | -0.72547300 | -3.04322600 |
| H | 4.19750800  | -4.19578300 | -0.62948900 |
| H | 5.56172000  | -3.06741600 | -2.37677400 |
| I | 2.91470800  | 1.45825500  | 1.49000800  |
| H | 1.24991900  | 0.51607100  | -0.47033300 |

**G1-IM4-a**

|   |            |             |            |
|---|------------|-------------|------------|
| C | 0.60245400 | -0.16230000 | 0.06500000 |
|---|------------|-------------|------------|



|   |             |             |             |
|---|-------------|-------------|-------------|
| N | -0.59070100 | 0.57881900  | 0.38886500  |
| C | -0.79049100 | 1.83513600  | -0.21895100 |
| C | -0.15206400 | 2.12183500  | -1.43438100 |
| C | -1.58277800 | 2.82050800  | 0.38767600  |
| C | -0.30900100 | 3.37112200  | -2.02808300 |
| H | 0.47080300  | 1.36003700  | -1.90590600 |
| C | -1.74743900 | 4.05848900  | -0.22822800 |
| H | -2.07361000 | 2.60806100  | 1.33747600  |
| C | -1.11104400 | 4.34522800  | -1.43526700 |
| H | 0.20177500  | 3.57861800  | -2.96971000 |
| H | -2.37078900 | 4.81300000  | 0.25491700  |
| H | -1.23424600 | 5.32153600  | -1.90587400 |
| N | 1.76033800  | 0.41451000  | 0.43538500  |
| H | 2.64519000  | -0.03642700 | 0.15366600  |
| N | 0.41559400  | -1.23550600 | -0.60934400 |
| C | 1.55183200  | -2.07012300 | -0.97686600 |
| H | 2.33289600  | -2.03462600 | -0.19442800 |
| C | 1.06788400  | -3.50757000 | -1.12132200 |
| H | 1.90191800  | -4.17114200 | -1.39095800 |
| H | 0.62663900  | -3.86133200 | -0.17864300 |
| H | 0.29492800  | -3.57107700 | -1.90359600 |
| C | 2.17658800  | -1.55240700 | -2.27243700 |
| H | 2.54499900  | -0.52320800 | -2.14618600 |
| H | 3.04866000  | -2.16225800 | -2.54743200 |
| H | 1.43203500  | -1.58001200 | -3.08478400 |
| C | 1.91489600  | 1.36715200  | 1.53503400  |
| H | 0.92776800  | 1.81412800  | 1.72188900  |
| C | 2.37111200  | 0.63430400  | 2.79546400  |
| H | 2.48888200  | 1.34072100  | 3.63141800  |
| H | 1.62917400  | -0.12765400 | 3.07529400  |
| H | 3.33736800  | 0.14271700  | 2.60229100  |
| C | 2.88448600  | 2.46820400  | 1.11841700  |
| H | 2.50608100  | 2.99422700  | 0.22949700  |
| H | 3.00730300  | 3.19621100  | 1.93397700  |
| H | 3.86593900  | 2.02971100  | 0.87904100  |
| C | -1.49735500 | -0.04882800 | 1.24615700  |
| O | -1.15423700 | -0.77634700 | 2.13118300  |
| O | -2.79109800 | 0.27580100  | 1.05787800  |
| H | -1.21808300 | -1.73552700 | -0.71856600 |
| C | -3.45187000 | 0.20747600  | -0.21236400 |
| C | -2.67760300 | -0.60406900 | -1.27569500 |
| H | -3.39777200 | -0.77037700 | -2.09859600 |
| H | -1.85503200 | 0.00210400  | -1.69056300 |
| O | -2.21641900 | -1.80204900 | -0.75815300 |

|   |             |             |             |
|---|-------------|-------------|-------------|
| C | -4.79519700 | -0.43162000 | 0.05278400  |
| C | -5.95555300 | 0.06392600  | -0.54289800 |
| C | -4.86652800 | -1.57781600 | 0.85186400  |
| C | -7.17982700 | -0.57779300 | -0.34911100 |
| H | -5.90248800 | 0.96357500  | -1.16176100 |
| C | -6.08832900 | -2.21650400 | 1.04539500  |
| H | -3.94953000 | -1.95326300 | 1.30895500  |
| C | -7.24781000 | -1.71958800 | 0.44618500  |
| H | -8.08296500 | -0.17898700 | -0.81489300 |
| H | -6.13577500 | -3.11124900 | 1.66877300  |
| H | -8.20453600 | -2.22163200 | 0.60225500  |
| H | -3.59658700 | 1.23475000  | -0.59003400 |
| I | 5.17468500  | -0.68289100 | 0.00491800  |

**G1-TS4-a**

|   |             |             |             |
|---|-------------|-------------|-------------|
| C | 0.63348800  | -0.19269300 | 0.22129800  |
| N | -0.54036400 | 0.53663200  | 0.43932500  |
| C | -0.64407700 | 1.84151400  | -0.09226100 |
| C | 0.00393100  | 2.15719800  | -1.29532300 |
| C | -1.36191100 | 2.84249100  | 0.57753300  |
| C | -0.05802000 | 3.44809000  | -1.81240300 |
| H | 0.56467900  | 1.38132900  | -1.82050300 |
| C | -1.43486800 | 4.12527100  | 0.04066200  |
| H | -1.86574000 | 2.59909600  | 1.51192400  |
| C | -0.78186800 | 4.43946000  | -1.15126900 |
| H | 0.46122700  | 3.67456200  | -2.74509900 |
| H | -2.00009800 | 4.89300000  | 0.57228700  |
| H | -0.83498300 | 5.44963700  | -1.55971200 |
| N | 1.79948200  | 0.34296700  | 0.56358300  |
| H | 2.67558900  | -0.09366700 | 0.21839900  |
| N | 0.48586500  | -1.36341600 | -0.34298200 |
| C | 1.47505400  | -2.43515500 | -0.35048200 |
| H | 2.32589900  | -2.13476000 | 0.28262400  |
| C | 0.81367400  | -3.67695100 | 0.24137900  |
| H | 1.53422000  | -4.50503400 | 0.29870400  |
| H | 0.42767900  | -3.46096600 | 1.24730900  |
| H | -0.03702700 | -3.98944800 | -0.38417500 |
| C | 2.00549900  | -2.66589400 | -1.76078400 |
| H | 2.52276500  | -1.76700800 | -2.12375200 |
| H | 2.73960600  | -3.48402300 | -1.75710400 |
| H | 1.17981900  | -2.92491800 | -2.44258000 |
| C | 2.00075500  | 1.39296900  | 1.56359200  |
| H | 1.00505100  | 1.74424300  | 1.86687300  |
| C | 2.70422100  | 0.78590000  | 2.77648200  |

|   |             |             |             |
|---|-------------|-------------|-------------|
| H | 2.86903500  | 1.55495000  | 3.54572600  |
| H | 2.09232700  | -0.01933300 | 3.20742800  |
| H | 3.67695300  | 0.37028300  | 2.47021300  |
| C | 2.79601600  | 2.54734800  | 0.96193500  |
| H | 2.25032100  | 3.00356400  | 0.12390800  |
| H | 2.97338900  | 3.31941300  | 1.72505400  |
| H | 3.76583300  | 2.17545100  | 0.59596700  |
| C | -1.65790200 | -0.20840100 | 1.04270900  |
| O | -1.44701700 | -0.90545300 | 1.99727200  |
| O | -2.84214900 | 0.45698700  | 0.86031700  |
| H | -0.58963300 | -1.55322800 | -0.56992500 |
| C | -3.50237500 | 0.36527600  | -0.39147700 |
| C | -2.61411800 | -0.51201600 | -1.32021200 |
| H | -3.27049500 | -0.97547400 | -2.08369200 |
| H | -1.90067900 | 0.14737500  | -1.86559700 |
| O | -2.00342100 | -1.41318200 | -0.50089200 |
| C | -4.84629100 | -0.28511900 | -0.17134400 |
| C | -5.97848000 | 0.13634200  | -0.87018700 |
| C | -4.93917900 | -1.38258000 | 0.69279000  |
| C | -7.19527400 | -0.52975700 | -0.71595600 |
| H | -5.90791000 | 0.99729900  | -1.54042300 |
| C | -6.15410900 | -2.04584900 | 0.84576000  |
| H | -4.04286000 | -1.69717200 | 1.23257100  |
| C | -7.28498900 | -1.62311200 | 0.14331000  |
| H | -8.07617500 | -0.18972400 | -1.26434600 |
| H | -6.21998000 | -2.90158000 | 1.52046600  |
| H | -8.23618600 | -2.14414900 | 0.26882400  |
| H | -3.62991000 | 1.38126700  | -0.80378800 |
| I | 5.05279300  | -0.63617100 | -0.34443700 |

**G1-IM5-a**

|   |             |             |             |
|---|-------------|-------------|-------------|
| C | 0.85534500  | -0.11367300 | 0.53389400  |
| N | -0.32023200 | 0.28380600  | 0.96440500  |
| C | -0.83163900 | 1.53877600  | 0.71272700  |
| C | -0.66230600 | 2.21593800  | -0.51756000 |
| C | -1.69818300 | 2.12368100  | 1.66169400  |
| C | -1.34209100 | 3.40196400  | -0.78230200 |
| H | 0.01335600  | 1.79018500  | -1.26282500 |
| C | -2.37077700 | 3.30982600  | 1.38819900  |
| H | -1.84735000 | 1.59113900  | 2.60190500  |
| C | -2.20620300 | 3.96035400  | 0.16236200  |
| H | -1.19400600 | 3.89656200  | -1.74540800 |
| H | -3.04254500 | 3.72953500  | 2.14053300  |
| H | -2.73830500 | 4.88844200  | -0.05124700 |

|   |             |             |             |
|---|-------------|-------------|-------------|
| N | 1.91792100  | 0.68803500  | 0.26829700  |
| H | 2.72541900  | 0.26702300  | -0.20981000 |
| N | 1.02019100  | -1.44846300 | 0.30489300  |
| C | 2.23866900  | -2.21208200 | 0.56894000  |
| H | 3.07472300  | -1.50193000 | 0.64400500  |
| C | 2.09881200  | -2.95816700 | 1.89473500  |
| H | 3.01379200  | -3.52491200 | 2.12045700  |
| H | 1.90981700  | -2.25328800 | 2.71732300  |
| H | 1.25307800  | -3.66430800 | 1.85589500  |
| C | 2.54588900  | -3.14516000 | -0.59440500 |
| H | 2.71083800  | -2.55775400 | -1.50752200 |
| H | 3.46670900  | -3.71134900 | -0.39449700 |
| H | 1.71763200  | -3.85616700 | -0.75364800 |
| C | 2.24880400  | 1.90236800  | 1.00902600  |
| H | 1.32209200  | 2.28353900  | 1.45923700  |
| C | 3.24365000  | 1.57072700  | 2.12239600  |
| H | 3.49976800  | 2.47245800  | 2.69989200  |
| H | 2.81364700  | 0.82734700  | 2.81102100  |
| H | 4.16362900  | 1.15455200  | 1.68175700  |
| C | 2.80716300  | 2.95058400  | 0.05163500  |
| H | 2.06056600  | 3.21100500  | -0.71204500 |
| H | 3.07927100  | 3.86372400  | 0.60148400  |
| H | 3.70496900  | 2.55343400  | -0.44768600 |
| C | -2.40547200 | -1.70695700 | 1.33238400  |
| O | -2.14105000 | -2.28723100 | 2.33071700  |
| O | -3.23283800 | -0.65057900 | 1.24137900  |
| H | 0.15189300  | -1.96431400 | 0.42006800  |
| C | -3.36284100 | -0.20508800 | -0.09925800 |
| C | -2.34783700 | -1.09693200 | -0.85896100 |
| H | -2.79737300 | -1.59951500 | -1.72499300 |
| H | -1.45338400 | -0.53334100 | -1.15593300 |
| O | -1.98877700 | -2.07369100 | 0.10118400  |
| C | -4.78215700 | -0.35738300 | -0.58758300 |
| C | -5.28449000 | 0.54532700  | -1.52782700 |
| C | -5.58611400 | -1.41500500 | -0.15434800 |
| C | -6.56940900 | 0.38415800  | -2.04420800 |
| H | -4.66309000 | 1.38641800  | -1.84598000 |
| C | -6.87249000 | -1.57299100 | -0.66660300 |
| H | -5.20553600 | -2.10608700 | 0.60050000  |
| C | -7.36562400 | -0.67697500 | -1.61570600 |
| H | -6.95368800 | 1.09628900  | -2.77654500 |
| H | -7.49566500 | -2.39938400 | -0.32048700 |
| H | -8.37353100 | -0.80156700 | -2.01527900 |
| H | -3.06495900 | 0.85097000  | -0.14405500 |

|   |            |             |             |
|---|------------|-------------|-------------|
| I | 5.18151300 | -0.23811500 | -1.08247000 |
|---|------------|-------------|-------------|

**G1-COM**

|   |             |             |             |
|---|-------------|-------------|-------------|
| C | -1.72912200 | -0.72982700 | 0.22390000  |
| N | -1.99484300 | 0.18329600  | -0.65776300 |
| C | -1.79226800 | 1.54140000  | -0.47833900 |
| C | -2.01583100 | 2.23726300  | 0.72960300  |
| C | -1.41995600 | 2.30557900  | -1.60525700 |
| C | -1.86365900 | 3.62149800  | 0.79874500  |
| H | -2.34086600 | 1.68506900  | 1.61236800  |
| C | -1.26661200 | 3.68476900  | -1.52815000 |
| H | -1.27116700 | 1.77566400  | -2.54746900 |
| C | -1.48369900 | 4.35789200  | -0.32271200 |
| H | -2.05309600 | 4.13052000  | 1.74596700  |
| H | -0.97999100 | 4.24411800  | -2.42101500 |
| H | -1.36863200 | 5.44070600  | -0.26286900 |
| N | -2.09943800 | -2.01936300 | -0.04906800 |
| H | -2.05062200 | -2.68978200 | 0.70599600  |
| N | -1.07476700 | -0.52913900 | 1.41399900  |
| H | -0.57993400 | 0.36059300  | 1.46612200  |
| C | -0.43464900 | -1.58268300 | 2.19622900  |
| H | -1.19210500 | -2.35760300 | 2.40924600  |
| C | 0.75180000  | -2.22050100 | 1.47218300  |
| H | 1.15248100  | -3.06659200 | 2.04960700  |
| H | 0.45847600  | -2.58453900 | 0.47712500  |
| H | 1.55492900  | -1.47874500 | 1.34852700  |
| C | -0.01172100 | -0.98270400 | 3.53214400  |
| H | -0.87717200 | -0.56083900 | 4.06124500  |
| H | 0.45543900  | -1.74703800 | 4.16786600  |
| H | 0.72145000  | -0.18024300 | 3.35927200  |
| C | -2.97581100 | -2.35108800 | -1.16307200 |
| H | -2.61621500 | -1.75883500 | -2.01602500 |
| C | -2.83127100 | -3.83548300 | -1.47132600 |
| H | -3.45359600 | -4.11290000 | -2.33290000 |
| H | -1.78643000 | -4.09047700 | -1.69727200 |
| H | -3.16026000 | -4.44660600 | -0.61447400 |
| C | -4.42443000 | -1.95548100 | -0.88556800 |
| H | -4.48259300 | -0.87798900 | -0.68209100 |
| H | -5.06336400 | -2.18197900 | -1.75172700 |
| H | -4.81528900 | -2.50700800 | -0.01571700 |
| C | 1.57695400  | 2.23000800  | 0.35332400  |
| H | 0.71947200  | 2.88558300  | 0.17024100  |
| C | 1.55496600  | 0.84712700  | -0.15808000 |
| H | 0.66048400  | 0.52887700  | -0.70964100 |

|   |            |             |             |
|---|------------|-------------|-------------|
| O | 1.32982300 | 1.13379900  | 1.21194000  |
| C | 2.81025600 | 0.11433400  | -0.48786600 |
| C | 3.87874800 | 0.08586400  | 0.41397900  |
| C | 2.92353500 | -0.55298800 | -1.70977000 |
| C | 5.05085500 | -0.59254900 | 0.08867600  |
| H | 3.77057500 | 0.58540400  | 1.37926000  |
| C | 4.09847000 | -1.22854000 | -2.03560100 |
| H | 2.08216100 | -0.54451200 | -2.40631300 |
| C | 5.16463600 | -1.24899900 | -1.13769000 |
| H | 5.87967900 | -0.61509800 | 0.79802600  |
| H | 4.17934000 | -1.74667000 | -2.99250700 |
| H | 6.08226100 | -1.78247200 | -1.38993500 |
| H | 2.55219500 | 2.71010000  | 0.49126200  |

### G1-IM1

|   |             |             |             |
|---|-------------|-------------|-------------|
| C | 2.90406000  | 0.10147800  | -0.15829600 |
| N | 2.71241900  | -1.16902900 | -0.20714100 |
| C | 1.90383400  | -1.79829100 | 0.74418700  |
| C | 2.33651700  | -1.96603700 | 2.07252100  |
| C | 0.65616200  | -2.32777500 | 0.37762200  |
| C | 1.55174900  | -2.65561100 | 2.99358000  |
| H | 3.30381600  | -1.55104200 | 2.36418300  |
| C | -0.12490300 | -3.02013200 | 1.30177000  |
| H | 0.28438700  | -2.19665800 | -0.64135400 |
| C | 0.32072900  | -3.19357100 | 2.61345700  |
| H | 1.90960600  | -2.77690500 | 4.01894200  |
| H | -1.10006000 | -3.38754200 | 0.97015000  |
| H | -0.29109600 | -3.73577000 | 3.33687300  |
| N | 3.80272300  | 0.68273000  | -1.04159700 |
| H | 3.57352000  | 1.62901200  | -1.31742900 |
| N | 2.31314200  | 0.95300000  | 0.73852400  |
| H | 1.49439500  | 0.58756900  | 1.22892500  |
| C | 2.43329200  | 2.39918200  | 0.71964200  |
| H | 3.48289200  | 2.63361100  | 0.47404500  |
| C | 1.51067100  | 3.04873000  | -0.31658200 |
| H | 1.65815100  | 4.13875200  | -0.35572200 |
| H | 1.68107100  | 2.63888800  | -1.32405400 |
| H | 0.45999500  | 2.85223200  | -0.05606300 |
| C | 2.14714800  | 2.93479000  | 2.11923900  |
| H | 2.85184400  | 2.50633100  | 2.84524300  |
| H | 2.23261600  | 4.03081900  | 2.14088600  |
| H | 1.12649900  | 2.65203100  | 2.41641600  |
| C | 4.40454500  | -0.13206600 | -2.09023600 |
| H | 3.64335900  | -0.83567900 | -2.46776500 |

|   |             |             |             |
|---|-------------|-------------|-------------|
| C | 4.85729700  | 0.78607800  | -3.21812000 |
| H | 5.32735600  | 0.20423800  | -4.02275800 |
| H | 4.00780900  | 1.33739100  | -3.64942600 |
| H | 5.59584500  | 1.51522500  | -2.84721700 |
| C | 5.56527300  | -0.95171500 | -1.53578100 |
| H | 5.20374900  | -1.59524700 | -0.72420400 |
| H | 5.99918000  | -1.58849800 | -2.32159500 |
| H | 6.34883700  | -0.28327700 | -1.14577500 |
| C | -1.34427500 | 0.70314000  | 0.74004100  |
| H | -1.03269500 | 0.00930000  | -0.04945100 |
| C | -1.55341100 | 0.11951800  | 2.06995900  |
| H | -2.28129500 | 0.59590400  | 2.73600700  |
| H | -1.37310500 | -0.95021800 | 2.20333600  |
| O | -0.40418000 | 0.90401500  | 1.79299900  |
| C | -2.10436300 | 1.90975400  | 0.30301300  |
| C | -2.86702200 | 1.86038100  | -0.86925600 |
| C | -2.06907500 | 3.08733200  | 1.05781600  |
| C | -3.58692500 | 2.98384000  | -1.27294000 |
| H | -2.90477500 | 0.92382800  | -1.43523500 |
| C | -2.78780600 | 4.20856000  | 0.64630500  |
| H | -1.45896300 | 3.11433900  | 1.96366200  |
| C | -3.54924100 | 4.15931400  | -0.52113000 |
| H | -4.18617800 | 2.93802400  | -2.18429800 |
| H | -2.75232500 | 5.12504300  | 1.23908600  |
| H | -4.11441000 | 5.03619500  | -0.84381700 |
| I | -3.03547400 | -2.06808100 | -1.13179200 |

### G1-TS1

|   |             |             |             |
|---|-------------|-------------|-------------|
| C | 2.61172500  | -0.10959200 | -0.04417800 |
| N | 2.16949900  | -1.21877500 | -0.55062700 |
| C | 1.41362800  | -2.13144000 | 0.17807600  |
| C | 1.73678100  | -2.54131800 | 1.48863300  |
| C | 0.31099100  | -2.74578300 | -0.44360900 |
| C | 0.99018400  | -3.52227700 | 2.13379900  |
| H | 2.58026000  | -2.07050900 | 1.99528600  |
| C | -0.44166500 | -3.71509200 | 0.21246900  |
| H | 0.03730400  | -2.42331000 | -1.44979800 |
| C | -0.10388200 | -4.11947800 | 1.50425800  |
| H | 1.26355600  | -3.81830400 | 3.14955100  |
| H | -1.31709400 | -4.13214300 | -0.28877600 |
| H | -0.69594000 | -4.87619200 | 2.02171300  |
| N | 3.53761800  | 0.61097300  | -0.77929800 |
| H | 3.54569000  | 1.60845300  | -0.61485100 |
| N | 2.26100300  | 0.40391800  | 1.16625100  |

|   |             |             |             |
|---|-------------|-------------|-------------|
| H | 1.31905400  | 0.10848800  | 1.52309100  |
| C | 2.58252600  | 1.74981500  | 1.61150000  |
| H | 3.64805000  | 1.94157900  | 1.39044300  |
| C | 1.70448500  | 2.80490200  | 0.92926000  |
| H | 1.97161000  | 3.82240000  | 1.25467100  |
| H | 1.78652800  | 2.75877000  | -0.16849200 |
| H | 0.65414000  | 2.60335600  | 1.18878800  |
| C | 2.38854500  | 1.79752700  | 3.12535100  |
| H | 3.05567000  | 1.07787200  | 3.62069100  |
| H | 2.59453100  | 2.80533600  | 3.51539100  |
| H | 1.34599400  | 1.52433700  | 3.34944700  |
| C | 3.90741100  | 0.18399800  | -2.12017000 |
| H | 3.00402600  | -0.20356300 | -2.62035700 |
| C | 4.44076200  | 1.38765800  | -2.88618300 |
| H | 4.73529600  | 1.09740500  | -3.90428500 |
| H | 3.67987400  | 2.17925600  | -2.96376400 |
| H | 5.32760200  | 1.80478700  | -2.38158400 |
| C | 4.92995700  | -0.94722000 | -2.06504400 |
| H | 4.50667600  | -1.78886400 | -1.50237200 |
| H | 5.18471800  | -1.29220400 | -3.07893300 |
| H | 5.84898000  | -0.60377500 | -1.56453600 |
| C | -1.28388000 | 0.19530200  | 0.40994300  |
| H | -0.51806600 | -0.21075200 | -0.25388800 |
| C | -1.33111700 | -0.41554300 | 1.74584400  |
| H | -2.26387600 | -0.20347800 | 2.30797400  |
| H | -1.15391700 | -1.50665000 | 1.73054300  |
| O | -0.24942800 | 0.37189000  | 2.05836500  |
| C | -1.64758800 | 1.61554000  | 0.19297300  |
| C | -1.36882100 | 2.22295000  | -1.03736000 |
| C | -2.21495200 | 2.39023700  | 1.21244000  |
| C | -1.64910300 | 3.57036400  | -1.24703800 |
| H | -0.93910400 | 1.61533700  | -1.83703200 |
| C | -2.49574000 | 3.73717600  | 1.00302300  |
| H | -2.38561300 | 1.93659300  | 2.18871800  |
| C | -2.21425400 | 4.33524800  | -0.22637600 |
| H | -1.42585300 | 4.02689600  | -2.21341300 |
| H | -2.92862300 | 4.33013700  | 1.81136200  |
| H | -2.43161600 | 5.39311300  | -0.38676200 |
| I | -3.15862700 | -1.00962600 | -1.04161700 |

**G1-IM2**

|   |             |            |             |
|---|-------------|------------|-------------|
| C | -1.85310200 | 1.08041500 | -0.15894800 |
| N | -0.90901000 | 1.68182800 | -0.88480900 |
| C | 0.07765100  | 2.45370200 | -0.32031100 |



|   |             |             |             |
|---|-------------|-------------|-------------|
| C | 0.01460700  | 3.14281900  | 0.91979100  |
| C | 1.28371200  | 2.59779500  | -1.05300100 |
| C | 1.08911600  | 3.89860700  | 1.37888300  |
| H | -0.88518300 | 3.05060200  | 1.52317100  |
| C | 2.35747200  | 3.33891100  | -0.57599200 |
| H | 1.34720400  | 2.07749800  | -2.01158600 |
| C | 2.27718800  | 4.00072000  | 0.65163900  |
| H | 0.99930300  | 4.40757200  | 2.34266500  |
| H | 3.27451200  | 3.39178100  | -1.16878900 |
| H | 3.12147700  | 4.57696600  | 1.03447300  |
| N | -2.91646900 | 0.55257400  | -0.91360500 |
| H | -3.30505300 | -0.29468800 | -0.51655400 |
| N | -1.84314500 | 0.91761700  | 1.14896500  |
| H | -0.44928800 | 0.52133300  | 1.95416600  |
| C | -2.95488800 | 0.30767400  | 1.84221400  |
| H | -3.90854000 | 0.50751400  | 1.31149300  |
| C | -2.77992000 | -1.21094900 | 1.98492800  |
| H | -3.61759400 | -1.66859100 | 2.53700800  |
| H | -2.69559800 | -1.70808600 | 1.00536600  |
| H | -1.83993300 | -1.40770000 | 2.52261100  |
| C | -3.05349000 | 0.94385300  | 3.23023600  |
| H | -3.21816000 | 2.02730000  | 3.14011100  |
| H | -3.87209100 | 0.50525700  | 3.82346200  |
| H | -2.10330100 | 0.78743300  | 3.76458700  |
| C | -2.90225000 | 0.58511600  | -2.36522200 |
| H | -1.87740100 | 0.38588600  | -2.72632800 |
| C | -3.84380200 | -0.49525300 | -2.88475900 |
| H | -3.86167700 | -0.50367000 | -3.98393800 |
| H | -3.52957800 | -1.49195600 | -2.53694700 |
| H | -4.86950100 | -0.31374900 | -2.52450400 |
| C | -3.30220300 | 1.96492600  | -2.88068300 |
| H | -2.60165100 | 2.70872900  | -2.48114500 |
| H | -3.26997600 | 1.99789000  | -3.98141200 |
| H | -4.32209800 | 2.21126100  | -2.54498800 |
| C | 1.13129600  | -0.60297100 | 0.30270400  |
| H | 0.69300700  | 0.15254200  | -0.35727000 |
| C | 1.43518800  | -0.02057700 | 1.69033900  |
| H | 2.16496300  | -0.66980600 | 2.20639800  |
| H | 1.92987600  | 0.95812000  | 1.52375000  |
| O | 0.29629600  | 0.06622200  | 2.47278000  |
| C | 0.29384500  | -1.84127400 | 0.25640300  |
| C | -0.57260200 | -2.03952000 | -0.82612500 |
| C | 0.34267500  | -2.80309800 | 1.27032900  |
| C | -1.35584800 | -3.19018300 | -0.90536600 |

|   |             |             |             |
|---|-------------|-------------|-------------|
| H | -0.62991400 | -1.26592500 | -1.59808600 |
| C | -0.45152300 | -3.94445000 | 1.19991600  |
| H | 0.99053000  | -2.63713500 | 2.13250100  |
| C | -1.29818000 | -4.14605800 | 0.10924900  |
| H | -2.02145400 | -3.33810900 | -1.75839900 |
| H | -0.41409600 | -4.68051400 | 2.00535100  |
| H | -1.91885100 | -5.04268500 | 0.05570300  |
| I | 3.06397000  | -0.98038100 | -0.70049600 |

**G1-TS2**

|   |             |             |             |
|---|-------------|-------------|-------------|
| C | 2.84929400  | 0.14478900  | -0.48288600 |
| N | 2.81216000  | -1.13624400 | -0.22639000 |
| C | 1.70345400  | -1.93245800 | -0.43928100 |
| C | 0.78830700  | -1.78847100 | -1.50758800 |
| C | 1.51911500  | -3.03597900 | 0.41914300  |
| C | -0.25830500 | -2.69072900 | -1.67904400 |
| H | 0.90462800  | -0.94444500 | -2.18732500 |
| C | 0.46768200  | -3.92858500 | 0.24475000  |
| H | 2.22530100  | -3.15024200 | 1.24234800  |
| C | -0.43787900 | -3.76435400 | -0.80433400 |
| H | -0.96076900 | -2.54476300 | -2.50423200 |
| H | 0.34697600  | -4.75788800 | 0.94585700  |
| H | -1.27769100 | -4.44890100 | -0.93156300 |
| N | 4.10479400  | 0.74289500  | -0.44224000 |
| H | 4.06657100  | 1.71162500  | -0.14751600 |
| N | 1.77352900  | 0.92766400  | -0.72080600 |
| C | 1.90361600  | 2.35636100  | -0.93407500 |
| H | 2.55118900  | 2.82201300  | -0.15701700 |
| C | 2.49625200  | 2.67270100  | -2.31029600 |
| H | 2.60594000  | 3.75968100  | -2.45289900 |
| H | 3.47802000  | 2.19697500  | -2.43922900 |
| H | 1.82167100  | 2.28410900  | -3.08862600 |
| C | 0.52916300  | 2.99914500  | -0.77778000 |
| H | 0.11664700  | 2.77069700  | 0.21335400  |
| H | 0.58920200  | 4.08887800  | -0.91994700 |
| H | -0.16549600 | 2.58568200  | -1.52671200 |
| C | 5.24222800  | 0.00740500  | 0.09207900  |
| H | 4.88964600  | -0.63218500 | 0.91903000  |
| C | 5.84757600  | -0.90208900 | -0.97242500 |
| H | 6.68640200  | -1.48317600 | -0.55813800 |
| H | 5.07758400  | -1.59678000 | -1.33066400 |
| H | 6.21505100  | -0.30153900 | -1.81966900 |
| C | 6.26087500  | 1.00747300  | 0.62509600  |
| H | 5.82146400  | 1.62123100  | 1.42638400  |

|   |             |             |             |
|---|-------------|-------------|-------------|
| H | 7.13826500  | 0.48642100  | 1.03386100  |
| H | 6.60428500  | 1.67620200  | -0.18091400 |
| H | 0.88489700  | 0.64110600  | 0.00849500  |
| C | -1.95609400 | 0.04450000  | -0.04647900 |
| H | -1.51190100 | -0.11320600 | -1.03871100 |
| C | -0.96117300 | -0.38308200 | 1.03939000  |
| H | -1.50780600 | -0.40846000 | 2.01045200  |
| H | -0.67207900 | -1.43378700 | 0.83237800  |
| O | 0.07571500  | 0.50495800  | 1.05380100  |
| C | -2.50080400 | 1.43939100  | 0.07636700  |
| C | -3.11545200 | 2.06097000  | -1.01739800 |
| C | -2.37317900 | 2.15853600  | 1.27032700  |
| C | -3.59691700 | 3.36436200  | -0.92529100 |
| H | -3.21704900 | 1.50477400  | -1.95307600 |
| C | -2.85475900 | 3.46301300  | 1.36434100  |
| H | -1.83533200 | 1.70862000  | 2.10415300  |
| C | -3.46896100 | 4.07153600  | 0.27050200  |
| H | -4.06941800 | 3.83212100  | -1.79132900 |
| H | -2.73384000 | 4.01433300  | 2.29894800  |
| H | -3.83948600 | 5.09577100  | 0.34639300  |
| I | -3.65613400 | -1.38303600 | -0.08670000 |
| C | 1.92757500  | 0.02278900  | 2.51173100  |
| O | 1.49735000  | -0.97135100 | 2.92597600  |
| O | 2.50682800  | 0.99795700  | 2.25346800  |

### G1-IM3

|   |             |             |             |
|---|-------------|-------------|-------------|
| C | 0.63323100  | 2.54628300  | 1.35335100  |
| O | 0.19848500  | 3.67745400  | 1.19617600  |
| O | 0.05023600  | 1.48998700  | 1.70087400  |
| I | 3.64112600  | -1.00788700 | -0.61541400 |
| C | 2.53719800  | 1.12747100  | 1.35986400  |
| C | 1.97086600  | 0.01281300  | 0.45237100  |
| O | 2.00206300  | 2.38740000  | 1.07470700  |
| H | 2.33843100  | 0.85343400  | 2.40833600  |
| H | 3.62002100  | 1.22767600  | 1.21805400  |
| C | 1.14487300  | -1.05960000 | 1.10099700  |
| C | 1.48538200  | -1.60631400 | 2.34337600  |
| C | 0.00120100  | -1.53715800 | 0.45253500  |
| C | 0.68708900  | -2.58232100 | 2.93508100  |
| H | 2.38914600  | -1.26809500 | 2.85469600  |
| C | -0.79875900 | -2.51272100 | 1.04255600  |
| H | -0.27497900 | -1.12821000 | -0.52097400 |
| C | -0.46236200 | -3.03827400 | 2.28928800  |
| H | 0.96588500  | -2.98956700 | 3.90907700  |

|   |             |             |             |
|---|-------------|-------------|-------------|
| H | -1.69690100 | -2.85151400 | 0.52063900  |
| H | -1.09141400 | -3.79844900 | 2.75671800  |
| H | 1.43555800  | 0.46592200  | -0.39001700 |
| C | 1.19310000  | 0.81985500  | -3.14632100 |
| C | -0.02183200 | 0.22124500  | -2.82994600 |
| C | -0.94217100 | 0.83406000  | -1.95250500 |
| C | -0.59365800 | 2.09730200  | -1.43225500 |
| C | 0.62597600  | 2.69323400  | -1.75172500 |
| C | 1.53064800  | 2.06158100  | -2.60458900 |
| H | 1.89258800  | 0.30025200  | -3.80483900 |
| H | -0.29263800 | -0.75293600 | -3.24216000 |
| H | -1.25007400 | 2.61884100  | -0.73565900 |
| H | 0.87337300  | 3.63882800  | -1.26648100 |
| H | 2.49668200  | 2.51919100  | -2.82313100 |
| N | -2.12336200 | 0.14228300  | -1.69965100 |
| C | -2.77744600 | 0.20610600  | -0.57814300 |
| N | -4.03848200 | -0.38355100 | -0.53487900 |
| H | -4.28052100 | -0.77236200 | 0.37058200  |
| N | -2.36020000 | 0.77418700  | 0.57326900  |
| C | -4.52433200 | -1.15632100 | -1.66463100 |
| C | -6.04132300 | -1.27348800 | -1.56767600 |
| C | -3.85093100 | -2.52512700 | -1.76225600 |
| H | -4.25195500 | -0.57979200 | -2.55866300 |
| H | -6.50436900 | -0.27821100 | -1.52186200 |
| H | -6.44864500 | -1.81697200 | -2.43260800 |
| H | -6.33151700 | -1.82841500 | -0.65948200 |
| H | -2.76306300 | -2.38779300 | -1.82795700 |
| H | -4.08844900 | -3.13411100 | -0.87333300 |
| H | -4.19156000 | -3.07619200 | -2.65231100 |
| C | -3.12657700 | 1.02669000  | 1.78428100  |
| C | -3.03292600 | 2.51345700  | 2.13327300  |
| C | -2.61556500 | 0.13866800  | 2.91975400  |
| H | -4.18267100 | 0.79497400  | 1.57527300  |
| H | -3.51701700 | 3.11541100  | 1.35004100  |
| H | -3.53188600 | 2.71949500  | 3.09303100  |
| H | -1.97748800 | 2.82098500  | 2.19128300  |
| H | -2.73411000 | -0.92653700 | 2.66818700  |
| H | -1.54199200 | 0.33708100  | 3.06008600  |
| H | -3.15396500 | 0.34520500  | 3.85778700  |
| H | -1.36818900 | 1.03603900  | 0.68732500  |

**G1-TS3**

|   |            |            |            |
|---|------------|------------|------------|
| C | 0.73803000 | 2.66726900 | 1.27457700 |
| O | 0.19954800 | 3.75129600 | 1.31876700 |

|   |             |             |             |
|---|-------------|-------------|-------------|
| O | 0.21050200  | 1.50428100  | 1.36013500  |
| I | 3.51887100  | -1.21454900 | -0.66102900 |
| C | 2.61725600  | 1.29600500  | 1.19840500  |
| C | 1.66460000  | 0.28737700  | 0.57095800  |
| O | 2.09970600  | 2.60457600  | 1.10033600  |
| H | 2.79777800  | 1.03466000  | 2.25408600  |
| H | 3.57244400  | 1.30391400  | 0.66999800  |
| C | 1.03307500  | -0.87228000 | 1.24610600  |
| C | 1.37640800  | -1.27710600 | 2.53948300  |
| C | -0.00196200 | -1.54320100 | 0.57929000  |
| C | 0.70351800  | -2.33221600 | 3.15171100  |
| H | 2.18457000  | -0.77527800 | 3.07255300  |
| C | -0.66891500 | -2.59979600 | 1.18974200  |
| H | -0.27710400 | -1.23028500 | -0.43121200 |
| C | -0.32013500 | -3.00061500 | 2.48075300  |
| H | 0.98684400  | -2.63789800 | 4.16076700  |
| H | -1.47024300 | -3.11090900 | 0.65166000  |
| H | -0.84264600 | -3.82976100 | 2.96177700  |
| H | 1.30158200  | 0.52858600  | -0.42815800 |
| C | 1.27516400  | 0.89563500  | -3.02635300 |
| C | 0.07264000  | 0.25312400  | -2.74660800 |
| C | -0.94127700 | 0.88116900  | -1.99561100 |
| C | -0.70851300 | 2.20700300  | -1.57427100 |
| C | 0.49647100  | 2.84688700  | -1.85675900 |
| C | 1.50035100  | 2.19716900  | -2.57623200 |
| H | 2.05853600  | 0.35766100  | -3.56251500 |
| H | -0.10209500 | -0.77182700 | -3.07929500 |
| H | -1.45767800 | 2.73457000  | -0.98352500 |
| H | 0.65720700  | 3.85280300  | -1.46419600 |
| H | 2.45516100  | 2.69048200  | -2.76307500 |
| N | -2.10308500 | 0.15122900  | -1.75052800 |
| C | -2.76132800 | 0.22331400  | -0.63472500 |
| N | -3.99026700 | -0.42121900 | -0.55646900 |
| H | -4.21486500 | -0.77372500 | 0.36812700  |
| N | -2.36816700 | 0.87750800  | 0.48409900  |
| C | -4.43259200 | -1.27822100 | -1.64398500 |
| C | -5.94197300 | -1.46573200 | -1.54411100 |
| C | -3.69074800 | -2.61422500 | -1.66325000 |
| H | -4.18523900 | -0.73798000 | -2.56747300 |
| H | -6.45564400 | -0.49471500 | -1.55959700 |
| H | -6.31506400 | -2.07942800 | -2.37679500 |
| H | -6.20910100 | -1.98052800 | -0.60584300 |
| H | -2.61021500 | -2.42953500 | -1.73412600 |
| H | -3.90271200 | -3.18400700 | -0.74267600 |

|   |             |             |             |
|---|-------------|-------------|-------------|
| H | -3.99911800 | -3.22922000 | -2.52246400 |
| C | -3.09432300 | 1.03824300  | 1.73201800  |
| C | -2.94539900 | 2.48499600  | 2.20231800  |
| C | -2.58905800 | 0.04571400  | 2.78105300  |
| H | -4.16168900 | 0.85622700  | 1.52844600  |
| H | -3.40977800 | 3.16903100  | 1.47758800  |
| H | -3.42609100 | 2.62816800  | 3.18201600  |
| H | -1.88144400 | 2.75725000  | 2.27488000  |
| H | -2.74323400 | -0.99273000 | 2.45075400  |
| H | -1.50570500 | 0.19242300  | 2.91811400  |
| H | -3.09852500 | 0.18985900  | 3.74629300  |
| H | -1.38124200 | 1.15635800  | 0.55775600  |

**G1-IM4**

|   |             |             |             |
|---|-------------|-------------|-------------|
| C | -1.06770800 | 1.44032700  | 2.60719200  |
| O | -0.55010700 | 1.89964300  | 3.57524000  |
| O | -0.40673300 | 1.10223600  | 1.48192200  |
| I | -3.03309100 | -1.96702600 | -1.37833000 |
| C | -2.63745400 | 0.58171000  | 1.19766300  |
| C | -1.31802500 | 0.76528700  | 0.42595000  |
| O | -2.37618700 | 1.22936400  | 2.44865200  |
| H | -3.48940700 | 1.06650500  | 0.70829800  |
| H | -2.86010200 | -0.48021800 | 1.35896100  |
| C | -1.32039400 | 1.86655900  | -0.60621700 |
| C | -1.22113800 | 3.20832400  | -0.22198100 |
| C | -1.41598800 | 1.54203900  | -1.96255600 |
| C | -1.19904500 | 4.21678100  | -1.18414700 |
| H | -1.13989000 | 3.47054200  | 0.83623200  |
| C | -1.39362200 | 2.55398100  | -2.92207500 |
| H | -1.52422300 | 0.49091200  | -2.24756900 |
| C | -1.27903800 | 3.89002300  | -2.53805100 |
| H | -1.11177800 | 5.26003400  | -0.87500900 |
| H | -1.46269000 | 2.29277200  | -3.97949600 |
| H | -1.25328400 | 4.67836600  | -3.29289900 |
| H | -1.01037100 | -0.18500300 | -0.02648400 |
| C | -0.90265700 | -2.27946900 | 1.94550000  |
| C | 0.17811300  | -2.24387700 | 1.06636900  |
| C | 1.40536400  | -1.68718600 | 1.45999600  |
| C | 1.52201000  | -1.18859300 | 2.77088300  |
| C | 0.43987600  | -1.22311700 | 3.64590400  |
| C | -0.78175000 | -1.76325300 | 3.23755800  |
| H | -1.84801800 | -2.68983000 | 1.58020800  |
| H | 0.05513300  | -2.61853900 | 0.04781800  |
| H | 2.47515300  | -0.75715000 | 3.08466800  |

|   |             |             |             |
|---|-------------|-------------|-------------|
| H | 0.54421500  | -0.80153000 | 4.64745700  |
| H | -1.63392700 | -1.77580700 | 3.91972300  |
| N | 2.47745700  | -1.65193700 | 0.56276600  |
| C | 2.88595000  | -0.51988600 | 0.10528700  |
| N | 4.01815700  | -0.47736500 | -0.69656700 |
| H | 4.02654800  | 0.27963100  | -1.37154600 |
| N | 2.29785200  | 0.68933800  | 0.35404900  |
| C | 4.58836800  | -1.72144900 | -1.19324800 |
| C | 6.02035900  | -1.46043800 | -1.64432900 |
| C | 3.74028800  | -2.34184100 | -2.30200300 |
| H | 4.58893200  | -2.40907000 | -0.33666000 |
| H | 6.61586500  | -1.03570100 | -0.82438700 |
| H | 6.49680900  | -2.39052000 | -1.98584700 |
| H | 6.03925900  | -0.74909700 | -2.48716800 |
| H | 2.72029200  | -2.51418100 | -1.93429600 |
| H | 3.69876300  | -1.67104500 | -3.17620400 |
| H | 4.16099800  | -3.30396100 | -2.63115800 |
| C | 2.81717300  | 1.99111000  | -0.02378900 |
| C | 2.40850600  | 3.00574600  | 1.03938200  |
| C | 2.34225900  | 2.42569500  | -1.41445900 |
| H | 3.91840400  | 1.91988600  | -0.02659200 |
| H | 2.79268900  | 2.71218900  | 2.02604900  |
| H | 2.78644800  | 4.00710400  | 0.78836500  |
| H | 1.31191500  | 3.05321400  | 1.10812900  |
| H | 2.59009200  | 1.67246000  | -2.17836800 |
| H | 1.24872900  | 2.54922500  | -1.41974000 |
| H | 2.80339800  | 3.38138300  | -1.70731800 |
| H | 1.45514400  | 0.67879400  | 0.92511400  |

**G1-TS2-a**

|   |             |             |             |
|---|-------------|-------------|-------------|
| C | 2.40971100  | -0.03481200 | 0.40117300  |
| N | 1.98354100  | -1.13105700 | -0.26843300 |
| C | 0.91525200  | -1.87083600 | 0.18145500  |
| C | 0.56055200  | -2.00303100 | 1.55044100  |
| C | 0.12179600  | -2.59523100 | -0.74353200 |
| C | -0.53115300 | -2.76706100 | 1.94581600  |
| H | 1.14196100  | -1.46628500 | 2.29860300  |
| C | -0.97271000 | -3.35090600 | -0.33370000 |
| H | 0.37717600  | -2.54317000 | -1.80080200 |
| C | -1.32514600 | -3.44015500 | 1.01340700  |
| H | -0.77440900 | -2.82462000 | 3.01030200  |
| H | -1.57130500 | -3.86723300 | -1.08804300 |
| H | -2.19678100 | -4.01613400 | 1.32759200  |
| N | 3.74943800  | 0.31366700  | 0.14615800  |

|   |             |             |             |
|---|-------------|-------------|-------------|
| H | 3.87948000  | 1.28455600  | -0.11064700 |
| N | 1.67121500  | 0.69708800  | 1.18753800  |
| H | -0.01328400 | 0.65073500  | 1.75774000  |
| C | 2.21846100  | 1.84044400  | 1.89241200  |
| H | 3.31146800  | 1.91624700  | 1.75074100  |
| C | 1.56853000  | 3.12134000  | 1.36135700  |
| H | 1.92166000  | 4.01012600  | 1.90942900  |
| H | 1.78945700  | 3.25294300  | 0.29113800  |
| H | 0.47505600  | 3.04220900  | 1.46767900  |
| C | 1.98021100  | 1.68731100  | 3.39823500  |
| H | 2.47945400  | 0.77799400  | 3.76612700  |
| H | 2.38423500  | 2.55244400  | 3.94859700  |
| H | 0.90402600  | 1.60065500  | 3.60304500  |
| C | 4.70900100  | -0.60996000 | -0.42539800 |
| H | 4.32487600  | -1.09104100 | -1.34121700 |
| C | 5.96237400  | 0.17379700  | -0.79551900 |
| H | 6.72870600  | -0.49344200 | -1.21494200 |
| H | 5.73102900  | 0.94412300  | -1.54753900 |
| H | 6.38004100  | 0.66869000  | 0.09560900  |
| C | 5.01918100  | -1.72791800 | 0.56647200  |
| H | 4.09318300  | -2.26348200 | 0.81566900  |
| H | 5.73323200  | -2.44671300 | 0.13540700  |
| H | 5.44660300  | -1.30470800 | 1.48893600  |
| C | -1.99140000 | 0.19147500  | 0.30119800  |
| H | -1.35304200 | -0.66109100 | 0.04394500  |
| C | -2.01123600 | 0.39522400  | 1.81657500  |
| H | -2.83903700 | 1.07550900  | 2.08658200  |
| H | -2.22630600 | -0.58636300 | 2.28170800  |
| O | -0.82434400 | 0.95548900  | 2.26241400  |
| C | -1.57706000 | 1.40504000  | -0.47453900 |
| C | -0.42268800 | 1.34182800  | -1.25839300 |
| C | -2.26353400 | 2.62072700  | -0.36814200 |
| C | 0.03493900  | 2.47066400  | -1.93863000 |
| H | 0.14412600  | 0.40936600  | -1.30485800 |
| C | -1.80527200 | 3.74920600  | -1.03976600 |
| H | -3.16906800 | 2.67255500  | 0.24202700  |
| C | -0.65567800 | 3.67532100  | -1.83124500 |
| H | 0.94552300  | 2.39123500  | -2.53433900 |
| H | -2.34656000 | 4.69310600  | -0.94840100 |
| H | -0.29768400 | 4.56253200  | -2.35778700 |
| I | -3.97067000 | -0.52730500 | -0.32731500 |
| C | 2.34112100  | -0.81918100 | -2.46096000 |
| O | 2.34816000  | -1.91641400 | -2.86907400 |
| O | 2.41378500  | 0.35202400  | -2.48506300 |



**G1-IM3-a**

|   |             |             |             |
|---|-------------|-------------|-------------|
| C | -2.40995600 | -0.77665000 | 0.15185500  |
| N | -1.51888000 | -0.07818900 | -0.69166900 |
| C | -1.26952500 | 1.26550100  | -0.41889400 |
| C | -1.56124400 | 1.79198600  | 0.85712000  |
| C | -0.75511300 | 2.14602100  | -1.39416400 |
| C | -1.36191100 | 3.14012800  | 1.13881600  |
| H | -1.93619400 | 1.12631400  | 1.63568000  |
| C | -0.56177000 | 3.48976300  | -1.09146800 |
| H | -0.49549400 | 1.74505900  | -2.37087500 |
| C | -0.86275400 | 4.00646200  | 0.16864500  |
| H | -1.59327400 | 3.51112300  | 2.13984500  |
| H | -0.15675100 | 4.14639800  | -1.86479800 |
| H | -0.69849800 | 5.06133500  | 0.39350800  |
| N | -3.73672400 | -0.48594900 | -0.00695700 |
| H | -4.37934800 | -1.01766700 | 0.56870700  |
| N | -1.92620100 | -1.56626400 | 1.03742900  |
| C | -2.78878400 | -2.31122300 | 1.92921400  |
| H | -3.69475600 | -2.66833200 | 1.39431100  |
| C | -2.02409000 | -3.53541900 | 2.42291300  |
| H | -2.61245400 | -4.10931400 | 3.15488300  |
| H | -1.77025000 | -4.18732200 | 1.57552800  |
| H | -1.07750400 | -3.21002900 | 2.87911200  |
| C | -3.22823400 | -1.42206600 | 3.09751200  |
| H | -3.75319700 | -0.52375800 | 2.73773700  |
| H | -3.89128400 | -1.96387600 | 3.78915500  |
| H | -2.33706000 | -1.09139200 | 3.65259600  |
| C | -4.32809700 | 0.10993900  | -1.19845800 |
| H | -3.49905300 | 0.54223500  | -1.77245900 |
| C | -4.99830800 | -0.95765000 | -2.05899400 |
| H | -5.44052800 | -0.50853100 | -2.96114000 |
| H | -4.23816300 | -1.69336300 | -2.35429400 |
| H | -5.80754400 | -1.45630600 | -1.49791900 |
| C | -5.28013300 | 1.22990500  | -0.78859700 |
| H | -4.74403800 | 1.98951900  | -0.20231300 |
| H | -5.72142200 | 1.71094500  | -1.67358800 |
| H | -6.10531100 | 0.83176500  | -0.17444700 |
| C | -1.14048300 | -0.82216100 | -1.94029800 |
| O | -1.90906900 | -1.75150100 | -2.18568300 |
| O | -0.13052900 | -0.39927500 | -2.50975900 |
| H | -0.21259600 | -1.91758700 | 1.10045700  |
| C | 1.83435600  | -0.20724600 | 0.21659700  |
| C | 1.22597000  | -0.71802300 | 1.52803800  |

|   |            |             |             |
|---|------------|-------------|-------------|
| H | 2.00448400 | -0.71373000 | 2.31186000  |
| H | 0.43669900 | -0.00809400 | 1.84202300  |
| O | 0.73745000 | -2.00704200 | 1.36928200  |
| C | 2.90488100 | -1.09082400 | -0.35271200 |
| C | 2.73400900 | -1.61657100 | -1.63810900 |
| C | 4.03777100 | -1.44851500 | 0.38882900  |
| C | 3.68647500 | -2.49054000 | -2.16591900 |
| H | 1.84015900 | -1.33894200 | -2.20654000 |
| C | 4.98604900 | -2.31697600 | -0.14147500 |
| H | 4.17953200 | -1.02523600 | 1.38649900  |
| C | 4.81171600 | -2.84293700 | -1.42390300 |
| H | 3.54105800 | -2.90126900 | -3.16707300 |
| H | 5.86596600 | -2.58666900 | 0.44652400  |
| H | 5.55367300 | -3.52767400 | -1.84054100 |
| I | 2.61259900 | 1.81610200  | 0.60638400  |
| H | 1.06026100 | -0.03105300 | -0.54243300 |

#### G1-TS3-a

|   |             |             |             |
|---|-------------|-------------|-------------|
| C | -2.65532600 | -0.41819300 | 0.17380100  |
| N | -1.61985600 | -0.11725000 | -0.72004400 |
| C | -1.11656500 | 1.18945400  | -0.79629900 |
| C | -1.20298600 | 2.06064700  | 0.29981500  |
| C | -0.50344500 | 1.64690600  | -1.97608300 |
| C | -0.68239600 | 3.35004400  | 0.22095800  |
| H | -1.65494100 | 1.70758400  | 1.22861900  |
| C | 0.02584800  | 2.93158900  | -2.03639200 |
| H | -0.40969900 | 0.96449300  | -2.81993100 |
| C | -0.06177800 | 3.79490600  | -0.94324300 |
| H | -0.73146500 | 3.99861900  | 1.09707500  |
| H | 0.51900300  | 3.26064300  | -2.95334900 |
| H | 0.36986400  | 4.79516700  | -0.99208800 |
| N | -3.80775100 | 0.31850700  | 0.01467600  |
| H | -4.55820000 | 0.08227300  | 0.65356800  |
| N | -2.45570900 | -1.31172700 | 1.06902500  |
| C | -3.52479800 | -1.77682300 | 1.92318600  |
| H | -4.49089700 | -1.78109100 | 1.37403300  |
| C | -3.21549100 | -3.21245600 | 2.33424700  |
| H | -3.99607000 | -3.61969500 | 2.99452700  |
| H | -3.13092500 | -3.84551700 | 1.44043800  |
| H | -2.24832500 | -3.24109800 | 2.85813700  |
| C | -3.66414100 | -0.86261100 | 3.14393800  |
| H | -3.88540500 | 0.17350200  | 2.84406300  |
| H | -4.46284900 | -1.21100200 | 3.81635900  |
| H | -2.71500400 | -0.85128300 | 3.70027800  |

|   |             |             |             |
|---|-------------|-------------|-------------|
| C | -4.24826600 | 0.79696400  | -1.29441100 |
| H | -3.41081800 | 1.35792900  | -1.73429500 |
| C | -4.60637000 | -0.36164800 | -2.22295300 |
| H | -4.86021800 | 0.00732100  | -3.22849300 |
| H | -3.75931600 | -1.06176100 | -2.29658600 |
| H | -5.47883700 | -0.90801900 | -1.82680400 |
| C | -5.40622000 | 1.76377300  | -1.08627900 |
| H | -5.10315300 | 2.60025900  | -0.44101600 |
| H | -5.74883900 | 2.16709900  | -2.04926600 |
| H | -6.26201700 | 1.25026100  | -0.61629300 |
| C | -0.98711400 | -1.26581900 | -1.43315700 |
| O | -1.74973300 | -2.16421300 | -1.74405300 |
| O | 0.24173700  | -1.13002200 | -1.63610600 |
| H | -0.81255400 | -2.07975100 | 0.93531900  |
| C | 1.50845700  | -0.44771700 | -0.05555400 |
| C | 0.76911100  | -1.00785200 | 1.16487600  |
| H | 1.52826800  | -1.10625500 | 1.95494200  |
| H | 0.05239800  | -0.24170700 | 1.50642300  |
| O | 0.15707400  | -2.24456100 | 0.96681700  |
| C | 2.63512600  | -1.16802100 | -0.65864200 |
| C | 3.39549700  | -0.54542900 | -1.65841800 |
| C | 2.92635900  | -2.48844700 | -0.29513800 |
| C | 4.44164700  | -1.22139700 | -2.27118800 |
| H | 3.16214400  | 0.48716800  | -1.92674700 |
| C | 3.97777800  | -3.16453000 | -0.91243800 |
| H | 2.29543500  | -2.98784900 | 0.44084400  |
| C | 4.73866100  | -2.53476500 | -1.89549100 |
| H | 5.03280500  | -0.72547300 | -3.04322600 |
| H | 4.19750800  | -4.19578300 | -0.62948900 |
| H | 5.56172000  | -3.06741600 | -2.37677400 |
| I | 2.91470800  | 1.45825500  | 1.49000800  |
| H | 1.24991900  | 0.51607100  | -0.47033300 |

**G1-IM4-a**

|   |             |             |             |
|---|-------------|-------------|-------------|
| C | 0.60245400  | -0.16230000 | 0.06500000  |
| N | -0.59070100 | 0.57881900  | 0.38886500  |
| C | -0.79049100 | 1.83513600  | -0.21895100 |
| C | -0.15206400 | 2.12183500  | -1.43438100 |
| C | -1.58277800 | 2.82050800  | 0.38767600  |
| C | -0.30900100 | 3.37112200  | -2.02808300 |
| H | 0.47080300  | 1.36003700  | -1.90590600 |
| C | -1.74743900 | 4.05848900  | -0.22822800 |
| H | -2.07361000 | 2.60806100  | 1.33747600  |
| C | -1.11104400 | 4.34522800  | -1.43526700 |

|   |             |             |             |
|---|-------------|-------------|-------------|
| H | 0.20177500  | 3.57861800  | -2.96971000 |
| H | -2.37078900 | 4.81300000  | 0.25491700  |
| H | -1.23424600 | 5.32153600  | -1.90587400 |
| N | 1.76033800  | 0.41451000  | 0.43538500  |
| H | 2.64519000  | -0.03642700 | 0.15366600  |
| N | 0.41559400  | -1.23550600 | -0.60934400 |
| C | 1.55183200  | -2.07012300 | -0.97686600 |
| H | 2.33289600  | -2.03462600 | -0.19442800 |
| C | 1.06788400  | -3.50757000 | -1.12132200 |
| H | 1.90191800  | -4.17114200 | -1.39095800 |
| H | 0.62663900  | -3.86133200 | -0.17864300 |
| H | 0.29492800  | -3.57107700 | -1.90359600 |
| C | 2.17658800  | -1.55240700 | -2.27243700 |
| H | 2.54499900  | -0.52320800 | -2.14618600 |
| H | 3.04866000  | -2.16225800 | -2.54743200 |
| H | 1.43203500  | -1.58001200 | -3.08478400 |
| C | 1.91489600  | 1.36715200  | 1.53503400  |
| H | 0.92776800  | 1.81412800  | 1.72188900  |
| C | 2.37111200  | 0.63430400  | 2.79546400  |
| H | 2.48888200  | 1.34072100  | 3.63141800  |
| H | 1.62917400  | -0.12765400 | 3.07529400  |
| H | 3.33736800  | 0.14271700  | 2.60229100  |
| C | 2.88448600  | 2.46820400  | 1.11841700  |
| H | 2.50608100  | 2.99422700  | 0.22949700  |
| H | 3.00730300  | 3.19621100  | 1.93397700  |
| H | 3.86593900  | 2.02971100  | 0.87904100  |
| C | -1.49735500 | -0.04882800 | 1.24615700  |
| O | -1.15423700 | -0.77634700 | 2.13118300  |
| O | -2.79109800 | 0.27580100  | 1.05787800  |
| H | -1.21808300 | -1.73552700 | -0.71856600 |
| C | -3.45187000 | 0.20747600  | -0.21236400 |
| C | -2.67760300 | -0.60406900 | -1.27569500 |
| H | -3.39777200 | -0.77037700 | -2.09859600 |
| H | -1.85503200 | 0.00210400  | -1.69056300 |
| O | -2.21641900 | -1.80204900 | -0.75815300 |
| C | -4.79519700 | -0.43162000 | 0.05278400  |
| C | -5.95555300 | 0.06392600  | -0.54289800 |
| C | -4.86652800 | -1.57781600 | 0.85186400  |
| C | -7.17982700 | -0.57779300 | -0.34911100 |
| H | -5.90248800 | 0.96357500  | -1.16176100 |
| C | -6.08832900 | -2.21650400 | 1.04539500  |
| H | -3.94953000 | -1.95326300 | 1.30895500  |
| C | -7.24781000 | -1.71958800 | 0.44618500  |
| H | -8.08296500 | -0.17898700 | -0.81489300 |

|   |             |             |             |
|---|-------------|-------------|-------------|
| H | -6.13577500 | -3.11124900 | 1.66877300  |
| H | -8.20453600 | -2.22163200 | 0.60225500  |
| H | -3.59658700 | 1.23475000  | -0.59003400 |
| I | 5.17468500  | -0.68289100 | 0.00491800  |

**G1-TS4-a**

|   |             |             |             |
|---|-------------|-------------|-------------|
| C | 0.63348800  | -0.19269300 | 0.22129800  |
| N | -0.54036400 | 0.53663200  | 0.43932500  |
| C | -0.64407700 | 1.84151400  | -0.09226100 |
| C | 0.00393100  | 2.15719800  | -1.29532300 |
| C | -1.36191100 | 2.84249100  | 0.57753300  |
| C | -0.05802000 | 3.44809000  | -1.81240300 |
| H | 0.56467900  | 1.38132900  | -1.82050300 |
| C | -1.43486800 | 4.12527100  | 0.04066200  |
| H | -1.86574000 | 2.59909600  | 1.51192400  |
| C | -0.78186800 | 4.43946000  | -1.15126900 |
| H | 0.46122700  | 3.67456200  | -2.74509900 |
| H | -2.00009800 | 4.89300000  | 0.57228700  |
| H | -0.83498300 | 5.44963700  | -1.55971200 |
| N | 1.79948200  | 0.34296700  | 0.56358300  |
| H | 2.67558900  | -0.09366700 | 0.21839900  |
| N | 0.48586500  | -1.36341600 | -0.34298200 |
| C | 1.47505400  | -2.43515500 | -0.35048200 |
| H | 2.32589900  | -2.13476000 | 0.28262400  |
| C | 0.81367400  | -3.67695100 | 0.24137900  |
| H | 1.53422000  | -4.50503400 | 0.29870400  |
| H | 0.42767900  | -3.46096600 | 1.24730900  |
| H | -0.03702700 | -3.98944800 | -0.38417500 |
| C | 2.00549900  | -2.66589400 | -1.76078400 |
| H | 2.52276500  | -1.76700800 | -2.12375200 |
| H | 2.73960600  | -3.48402300 | -1.75710400 |
| H | 1.17981900  | -2.92491800 | -2.44258000 |
| C | 2.00075500  | 1.39296900  | 1.56359200  |
| H | 1.00505100  | 1.74424300  | 1.86687300  |
| C | 2.70422100  | 0.78590000  | 2.77648200  |
| H | 2.86903500  | 1.55495000  | 3.54572600  |
| H | 2.09232700  | -0.01933300 | 3.20742800  |
| H | 3.67695300  | 0.37028300  | 2.47021300  |
| C | 2.79601600  | 2.54734800  | 0.96193500  |
| H | 2.25032100  | 3.00356400  | 0.12390800  |
| H | 2.97338900  | 3.31941300  | 1.72505400  |
| H | 3.76583300  | 2.17545100  | 0.59596700  |
| C | -1.65790200 | -0.20840100 | 1.04270900  |
| O | -1.44701700 | -0.90545300 | 1.99727200  |

|   |             |             |             |
|---|-------------|-------------|-------------|
| O | -2.84214900 | 0.45698700  | 0.86031700  |
| H | -0.58963300 | -1.55322800 | -0.56992500 |
| C | -3.50237500 | 0.36527600  | -0.39147700 |
| C | -2.61411800 | -0.51201600 | -1.32021200 |
| H | -3.27049500 | -0.97547400 | -2.08369200 |
| H | -1.90067900 | 0.14737500  | -1.86559700 |
| O | -2.00342100 | -1.41318200 | -0.50089200 |
| C | -4.84629100 | -0.28511900 | -0.17134400 |
| C | -5.97848000 | 0.13634200  | -0.87018700 |
| C | -4.93917900 | -1.38258000 | 0.69279000  |
| C | -7.19527400 | -0.52975700 | -0.71595600 |
| H | -5.90791000 | 0.99729900  | -1.54042300 |
| C | -6.15410900 | -2.04584900 | 0.84576000  |
| H | -4.04286000 | -1.69717200 | 1.23257100  |
| C | -7.28498900 | -1.62311200 | 0.14331000  |
| H | -8.07617500 | -0.18972400 | -1.26434600 |
| H | -6.21998000 | -2.90158000 | 1.52046600  |
| H | -8.23618600 | -2.14414900 | 0.26882400  |
| H | -3.62991000 | 1.38126700  | -0.80378800 |
| I | 5.05279300  | -0.63617100 | -0.34443700 |

**G1-IM5-a**

|   |             |             |             |
|---|-------------|-------------|-------------|
| C | 0.85534500  | -0.11367300 | 0.53389400  |
| N | -0.32023200 | 0.28380600  | 0.96440500  |
| C | -0.83163900 | 1.53877600  | 0.71272700  |
| C | -0.66230600 | 2.21593800  | -0.51756000 |
| C | -1.69818300 | 2.12368100  | 1.66169400  |
| C | -1.34209100 | 3.40196400  | -0.78230200 |
| H | 0.01335600  | 1.79018500  | -1.26282500 |
| C | -2.37077700 | 3.30982600  | 1.38819900  |
| H | -1.84735000 | 1.59113900  | 2.60190500  |
| C | -2.20620300 | 3.96035400  | 0.16236200  |
| H | -1.19400600 | 3.89656200  | -1.74540800 |
| H | -3.04254500 | 3.72953500  | 2.14053300  |
| H | -2.73830500 | 4.88844200  | -0.05124700 |
| N | 1.91792100  | 0.68803500  | 0.26829700  |
| H | 2.72541900  | 0.26702300  | -0.20981000 |
| N | 1.02019100  | -1.44846300 | 0.30489300  |
| C | 2.23866900  | -2.21208200 | 0.56894000  |
| H | 3.07472300  | -1.50193000 | 0.64400500  |
| C | 2.09881200  | -2.95816700 | 1.89473500  |
| H | 3.01379200  | -3.52491200 | 2.12045700  |
| H | 1.90981700  | -2.25328800 | 2.71732300  |
| H | 1.25307800  | -3.66430800 | 1.85589500  |

|   |             |             |             |
|---|-------------|-------------|-------------|
| C | 2.54588900  | -3.14516000 | -0.59440500 |
| H | 2.71083800  | -2.55775400 | -1.50752200 |
| H | 3.46670900  | -3.71134900 | -0.39449700 |
| H | 1.71763200  | -3.85616700 | -0.75364800 |
| C | 2.24880400  | 1.90236800  | 1.00902600  |
| H | 1.32209200  | 2.28353900  | 1.45923700  |
| C | 3.24365000  | 1.57072700  | 2.12239600  |
| H | 3.49976800  | 2.47245800  | 2.69989200  |
| H | 2.81364700  | 0.82734700  | 2.81102100  |
| H | 4.16362900  | 1.15455200  | 1.68175700  |
| C | 2.80716300  | 2.95058400  | 0.05163500  |
| H | 2.06056600  | 3.21100500  | -0.71204500 |
| H | 3.07927100  | 3.86372400  | 0.60148400  |
| H | 3.70496900  | 2.55343400  | -0.44768600 |
| C | -2.40547200 | -1.70695700 | 1.33238400  |
| O | -2.14105000 | -2.28723100 | 2.33071700  |
| O | -3.23283800 | -0.65057900 | 1.24137900  |
| H | 0.15189300  | -1.96431400 | 0.42006800  |
| C | -3.36284100 | -0.20508800 | -0.09925800 |
| C | -2.34783700 | -1.09693200 | -0.85896100 |
| H | -2.79737300 | -1.59951500 | -1.72499300 |
| H | -1.45338400 | -0.53334100 | -1.15593300 |
| O | -1.98877700 | -2.07369100 | 0.10118400  |
| C | -4.78215700 | -0.35738300 | -0.58758300 |
| C | -5.28449000 | 0.54532700  | -1.52782700 |
| C | -5.58611400 | -1.41500500 | -0.15434800 |
| C | -6.56940900 | 0.38415800  | -2.04420800 |
| H | -4.66309000 | 1.38641800  | -1.84598000 |
| C | -6.87249000 | -1.57299100 | -0.66660300 |
| H | -5.20553600 | -2.10608700 | 0.60050000  |
| C | -7.36562400 | -0.67697500 | -1.61570600 |
| H | -6.95368800 | 1.09628900  | -2.77654500 |
| H | -7.49566500 | -2.39938400 | -0.32048700 |
| H | -8.37353100 | -0.80156700 | -2.01527900 |
| H | -3.06495900 | 0.85097000  | -0.14405500 |
| I | 5.18151300  | -0.23811500 | -1.08247000 |

**G2-COM**

|   |            |             |             |
|---|------------|-------------|-------------|
| C | 0.01588700 | 2.03011700  | 0.33767000  |
| N | 0.93764100 | 1.77872200  | -0.55025400 |
| C | 1.97019100 | 0.88836600  | -0.38340600 |
| C | 2.62807100 | 0.61982100  | 0.84148900  |
| C | 2.47118700 | 0.24417500  | -1.54003200 |
| C | 3.70681100 | -0.25121600 | 0.90195300  |

|   |             |             |             |
|---|-------------|-------------|-------------|
| H | 2.29682300  | 1.12287500  | 1.74996100  |
| C | 3.54611800  | -0.62586600 | -1.48245100 |
| H | 1.98601400  | 0.46758900  | -2.49093700 |
| C | 4.17521100  | -0.89220000 | -0.25424900 |
| H | 4.20160900  | -0.43895100 | 1.85594300  |
| H | 3.91162300  | -1.11014900 | -2.38898200 |
| N | -0.77763000 | 3.12140200  | 0.14725700  |
| H | -1.62568900 | 3.19629300  | 0.69229300  |
| N | -0.22789000 | 1.28167400  | 1.45428100  |
| H | 0.21346000  | 0.36195600  | 1.45263000  |
| C | -1.44874800 | 1.34257500  | 2.25026600  |
| H | -1.62714800 | 2.40009600  | 2.51065900  |
| C | -2.65865300 | 0.78205000  | 1.49862600  |
| H | -3.58099500 | 0.91556600  | 2.08233400  |
| H | -2.79379900 | 1.27018300  | 0.52129700  |
| H | -2.51934900 | -0.29492400 | 1.31929600  |
| C | -1.20521300 | 0.57870600  | 3.54643500  |
| H | -0.36630200 | 1.01571400  | 4.10463700  |
| H | -2.10165900 | 0.59799100  | 4.18076200  |
| H | -0.96603400 | -0.47060100 | 3.31492500  |
| C | -0.68409100 | 3.95848900  | -1.04226700 |
| H | 0.38776100  | 4.05375900  | -1.26228500 |
| C | -1.36590400 | 3.30234900  | -2.24103500 |
| H | -1.25232000 | 3.92128000  | -3.14282800 |
| H | -0.91132500 | 2.32072800  | -2.43085400 |
| H | -2.44265300 | 3.17040200  | -2.04834400 |
| C | -1.26635800 | 5.32916700  | -0.72476000 |
| H | -0.74426900 | 5.79243900  | 0.12367700  |
| H | -1.17927300 | 5.99445300  | -1.59430400 |
| H | -2.33721300 | 5.25012100  | -0.47464100 |
| C | 5.28481300  | -1.80366100 | -0.18386500 |
| N | 6.17176900  | -2.54265700 | -0.12564200 |
| C | 0.71363000  | -2.37768800 | 0.20248900  |
| H | 1.72600300  | -2.02669000 | -0.02128600 |
| C | -0.44528500 | -1.58035500 | -0.24039100 |
| H | -0.23646400 | -0.64888100 | -0.78416600 |
| O | -0.01513300 | -1.57715500 | 1.11154600  |
| C | -1.77164700 | -2.20433000 | -0.50939600 |
| C | -2.32132300 | -3.11647300 | 0.39788200  |
| C | -2.47803400 | -1.87759100 | -1.66942200 |
| C | -3.55572900 | -3.70521000 | 0.13722900  |
| H | -1.77778400 | -3.34513900 | 1.31705000  |
| C | -3.71295300 | -2.46990500 | -1.93022300 |
| H | -2.05821200 | -1.15251100 | -2.37071900 |



|   |             |             |             |
|---|-------------|-------------|-------------|
| C | -4.25311800 | -3.38613900 | -1.02887200 |
| H | -3.97906600 | -4.41491700 | 0.84983300  |
| H | -4.25802600 | -2.21125500 | -2.83928900 |
| H | -5.22060900 | -3.84812100 | -1.23084900 |
| H | 0.57955100  | -3.45712800 | 0.33030000  |

**G2-IM1**

|   |             |             |             |
|---|-------------|-------------|-------------|
| C | -2.84819100 | -0.12623700 | 0.12898100  |
| N | -2.32603300 | -1.23488400 | 0.53146100  |
| C | -1.46903900 | -1.98724100 | -0.25144700 |
| C | -1.82088300 | -2.45368400 | -1.53747300 |
| C | -0.21782800 | -2.36211500 | 0.27350300  |
| C | -0.96211800 | -3.27189400 | -2.25595700 |
| H | -2.78638200 | -2.16718100 | -1.95779700 |
| C | 0.65042000  | -3.16894000 | -0.44692300 |
| H | 0.09224500  | -1.98861200 | 1.25187700  |
| C | 0.28121700  | -3.64251700 | -1.71738700 |
| H | -1.24761000 | -3.63365400 | -3.24510600 |
| H | 1.62814700  | -3.39778400 | -0.01697100 |
| N | -3.80691700 | 0.48045400  | 0.91377400  |
| H | -3.90574800 | 1.48041600  | 0.78897900  |
| N | -2.54466400 | 0.49739300  | -1.05431000 |
| H | -1.66714100 | 0.18675200  | -1.47679500 |
| C | -2.89248300 | 1.87326100  | -1.37419200 |
| H | -3.96382700 | 2.00623100  | -1.14412200 |
| C | -2.06401900 | 2.88637600  | -0.57864300 |
| H | -2.38409700 | 3.91723300  | -0.79302700 |
| H | -2.14454300 | 2.71554300  | 0.50554900  |
| H | -1.00172500 | 2.79283500  | -0.84911100 |
| C | -2.71066300 | 2.07651700  | -2.87477100 |
| H | -3.34424500 | 1.37859200  | -3.43917700 |
| H | -2.96843200 | 3.10605600  | -3.16108200 |
| H | -1.65979600 | 1.88908900  | -3.14147800 |
| C | -4.02175600 | 0.02256800  | 2.28138400  |
| H | -4.02143600 | -1.07426000 | 2.23246900  |
| C | -2.89275300 | 0.46330900  | 3.21119700  |
| H | -3.04582900 | 0.07363100  | 4.22842600  |
| H | -1.92788300 | 0.08965300  | 2.84175000  |
| H | -2.85121300 | 1.56373000  | 3.27095300  |
| C | -5.38426100 | 0.51553400  | 2.75306900  |
| H | -6.18035000 | 0.16768300  | 2.08017400  |
| H | -5.59551100 | 0.15574500  | 3.76983000  |
| H | -5.41126900 | 1.61793200  | 2.77894100  |
| C | 1.16044100  | -4.48753300 | -2.48059900 |

|   |            |             |             |
|---|------------|-------------|-------------|
| N | 1.85146800 | -5.16708100 | -3.11223000 |
| C | 1.39906500 | -0.06054000 | -2.13394900 |
| H | 1.34905600 | -1.14355400 | -1.99072300 |
| C | 1.10795100 | 0.82220000  | -0.99379700 |
| H | 0.87829800 | 0.33421000  | -0.03693800 |
| O | 0.16081200 | 0.61994200  | -2.04158700 |
| C | 1.69870400 | 2.19012600  | -0.91236100 |
| C | 1.55930600 | 3.09244100  | -1.97313600 |
| C | 2.40217100 | 2.57137900  | 0.23538600  |
| C | 2.12127200 | 4.36521800  | -1.89138400 |
| H | 0.99174000 | 2.78868400  | -2.85594500 |
| C | 2.96562600 | 3.84470300  | 0.30825300  |
| H | 2.51207500 | 1.85316900  | 1.05545900  |
| C | 2.82766300 | 4.74397200  | -0.74947100 |
| H | 2.00470900 | 5.06592300  | -2.72065700 |
| H | 3.51812100 | 4.13388000  | 1.20418000  |
| H | 3.26817200 | 5.74091700  | -0.68347800 |
| H | 2.06723300 | 0.30846700  | -2.91983200 |
| I | 2.62178700 | -0.83761200 | 2.22044900  |

#### G2-TS1

|   |             |             |             |
|---|-------------|-------------|-------------|
| C | 1.74020900  | -1.95212200 | -0.19403300 |
| N | 0.67262100  | -2.11930600 | -0.92418100 |
| C | -0.59217000 | -2.26817500 | -0.39666500 |
| C | -0.88819900 | -3.03100800 | 0.75878400  |
| C | -1.67661800 | -1.68506000 | -1.08723000 |
| C | -2.19464900 | -3.20626400 | 1.18282500  |
| H | -0.07076000 | -3.48298100 | 1.32020200  |
| C | -2.98331900 | -1.84331500 | -0.65591000 |
| H | -1.46122600 | -1.06513100 | -1.95871100 |
| C | -3.26060300 | -2.61744500 | 0.48199200  |
| H | -2.40569600 | -3.80235900 | 2.07221900  |
| H | -3.79239200 | -1.34244300 | -1.18898900 |
| N | 2.96809400  | -2.11314300 | -0.80161100 |
| H | 3.73729000  | -1.61059100 | -0.37527000 |
| N | 1.73768600  | -1.64106600 | 1.12426700  |
| H | 0.87512800  | -1.13707600 | 1.46159000  |
| C | 2.91162800  | -1.23951600 | 1.88295000  |
| H | 3.73516500  | -1.93510800 | 1.64057000  |
| C | 3.32793700  | 0.20175200  | 1.57002700  |
| H | 4.22930300  | 0.48816300  | 2.13346900  |
| H | 3.52669300  | 0.35067600  | 0.49678200  |
| H | 2.49942400  | 0.87227700  | 1.84415400  |
| C | 2.57450500  | -1.38472200 | 3.36469200  |

|   |             |             |             |
|---|-------------|-------------|-------------|
| H | 2.32693200  | -2.42876800 | 3.60340500  |
| H | 3.41929100  | -1.06484700 | 3.99200400  |
| H | 1.69803800  | -0.75606600 | 3.58501200  |
| C | 3.07255900  | -2.29565900 | -2.24057300 |
| H | 2.27361600  | -2.99828900 | -2.51275800 |
| C | 2.83710200  | -0.99036600 | -2.99925500 |
| H | 2.88938000  | -1.14911800 | -4.08686300 |
| H | 1.84218200  | -0.59808800 | -2.75022900 |
| H | 3.59861800  | -0.24185600 | -2.72390700 |
| C | 4.42921100  | -2.91083900 | -2.56234400 |
| H | 4.56549000  | -3.85938300 | -2.02464300 |
| H | 4.52507900  | -3.09778800 | -3.64131600 |
| H | 5.24486300  | -2.22848200 | -2.26981000 |
| C | -4.61152900 | -2.81498400 | 0.93048100  |
| N | -5.69523500 | -2.99340900 | 1.29500000  |
| C | -1.19315300 | 0.59228800  | 1.62118800  |
| H | -1.95339700 | -0.16210000 | 1.34582800  |
| C | -0.42777300 | 1.09132600  | 0.47375100  |
| H | -0.18450600 | 0.34414500  | -0.28249200 |
| O | 0.00943400  | 0.10891100  | 2.08387100  |
| C | 0.51629900  | 2.22576900  | 0.58939700  |
| C | 0.59482100  | 3.00124500  | 1.75257800  |
| C | 1.39599600  | 2.49998600  | -0.46453100 |
| C | 1.53142500  | 4.02575700  | 1.85513500  |
| H | -0.05555100 | 2.76505400  | 2.59493400  |
| C | 2.33293700  | 3.52442700  | -0.36222500 |
| H | 1.32512300  | 1.90339000  | -1.37706200 |
| C | 2.40541200  | 4.29273900  | 0.80012000  |
| H | 1.58563400  | 4.61677500  | 2.77163100  |
| H | 3.01050000  | 3.72471300  | -1.19452400 |
| H | 3.14066900  | 5.09518200  | 0.88532700  |
| H | -1.66672000 | 1.38120500  | 2.23723100  |
| I | -2.21449000 | 2.13813600  | -1.22509400 |

**G2-IM2**

|   |             |             |             |
|---|-------------|-------------|-------------|
| C | 1.22779200  | -1.97311400 | -0.15093100 |
| N | 0.14555400  | -1.88342200 | -0.94741700 |
| C | -1.11899600 | -1.91169300 | -0.46644800 |
| C | -1.54492600 | -2.47083300 | 0.77728500  |
| C | -2.14722400 | -1.36158300 | -1.28822400 |
| C | -2.87567700 | -2.46999200 | 1.14933400  |
| H | -0.79716400 | -2.88662100 | 1.44826700  |
| C | -3.47288900 | -1.34560900 | -0.90482300 |
| H | -1.84012000 | -0.92657000 | -2.24115600 |

|   |             |             |             |
|---|-------------|-------------|-------------|
| C | -3.86760400 | -1.90163800 | 0.32727600  |
| H | -3.16817500 | -2.90702600 | 2.10636200  |
| H | -4.22415200 | -0.89238900 | -1.55438800 |
| N | 2.38263100  | -2.40996700 | -0.80195400 |
| H | 3.25568500  | -2.11276000 | -0.38430700 |
| N | 1.25635100  | -1.65476300 | 1.12029200  |
| H | 0.20726700  | -0.56881500 | 1.87269800  |
| C | 2.46711200  | -1.79140400 | 1.89955800  |
| H | 3.03825300  | -2.68945400 | 1.58147700  |
| C | 3.37765800  | -0.56381900 | 1.76380800  |
| H | 4.28401500  | -0.65975000 | 2.38338500  |
| H | 3.68667700  | -0.39550100 | 0.72058400  |
| H | 2.82234900  | 0.33366000  | 2.07873100  |
| C | 2.07543500  | -1.98884700 | 3.36420300  |
| H | 1.45065800  | -2.88737500 | 3.47146600  |
| H | 2.96261900  | -2.09314100 | 4.00846900  |
| H | 1.48548200  | -1.12339900 | 3.70298200  |
| C | 2.43398700  | -2.63901700 | -2.23281400 |
| H | 1.51144200  | -3.17696900 | -2.49037200 |
| C | 2.45324400  | -1.33690800 | -3.03455500 |
| H | 2.48838600  | -1.53162900 | -4.11787100 |
| H | 1.53935600  | -0.77272800 | -2.80452900 |
| H | 3.33542900  | -0.73201600 | -2.76330800 |
| C | 3.64130600  | -3.51659400 | -2.54798300 |
| H | 3.59598100  | -4.45570000 | -1.97899200 |
| H | 3.68782500  | -3.75143400 | -3.62132800 |
| H | 4.57774200  | -2.99828800 | -2.27980700 |
| C | -5.24282700 | -1.89982100 | 0.72803700  |
| N | -6.35679000 | -1.90511500 | 1.04803000  |
| C | -1.05507000 | 0.89661500  | 1.49862000  |
| H | -1.97147300 | 0.34836300  | 1.20203300  |
| C | -0.29789300 | 1.25362600  | 0.21528000  |
| H | -0.20398200 | 0.37844600  | -0.43955000 |
| O | -0.24677000 | 0.18278500  | 2.37017900  |
| C | 1.04408600  | 1.89262800  | 0.39404500  |
| C | 1.35853600  | 2.65117500  | 1.52724500  |
| C | 2.02429900  | 1.70556100  | -0.58713200 |
| C | 2.62493400  | 3.21388300  | 1.66874800  |
| H | 0.61685100  | 2.76723700  | 2.31823500  |
| C | 3.28783400  | 2.27495800  | -0.45125900 |
| H | 1.78355000  | 1.09265200  | -1.45935400 |
| C | 3.59274200  | 3.03210800  | 0.67970500  |
| H | 2.86299500  | 3.79166000  | 2.56398800  |
| H | 4.04158300  | 2.11544600  | -1.22510700 |

|   |             |            |             |
|---|-------------|------------|-------------|
| H | 4.58498700  | 3.47252900 | 0.79586200  |
| H | -1.38411700 | 1.82313500 | 2.00141400  |
| I | -1.58802200 | 2.57454600 | -0.99554400 |

**G2-TS2**

|   |             |             |             |
|---|-------------|-------------|-------------|
| C | 2.97168400  | 0.01528300  | -0.44560900 |
| N | 2.75014400  | -1.22676000 | -0.08849100 |
| C | 1.56233700  | -1.88299300 | -0.26703900 |
| C | 0.66410700  | -1.67311600 | -1.34535300 |
| C | 1.25007800  | -2.92928000 | 0.63451500  |
| C | -0.47015300 | -2.45401400 | -1.49641300 |
| H | 0.87351500  | -0.87431800 | -2.05589500 |
| C | 0.11515600  | -3.70510400 | 0.48715900  |
| H | 1.93410200  | -3.08931100 | 1.46781700  |
| C | -0.76669900 | -3.47957400 | -0.58315900 |
| H | -1.15311100 | -2.27163800 | -2.32884100 |
| H | -0.10652900 | -4.49512900 | 1.20639900  |
| N | 4.29047300  | 0.42173700  | -0.48082700 |
| H | 4.41800800  | 1.41142400  | -0.30865200 |
| N | 2.01018600  | 0.92235500  | -0.72164900 |
| C | 2.31265100  | 2.31907400  | -0.98438800 |
| H | 3.04504100  | 2.70626500  | -0.24307400 |
| C | 2.88381600  | 2.51361300  | -2.39070800 |
| H | 3.12731600  | 3.57189900  | -2.57265000 |
| H | 3.78927900  | 1.90992600  | -2.54251200 |
| H | 2.13421600  | 2.19524000  | -3.13095500 |
| C | 1.03908500  | 3.13408600  | -0.78944000 |
| H | 0.64109200  | 2.96872400  | 0.21992700  |
| H | 1.23509200  | 4.20459300  | -0.95030700 |
| H | 0.26609800  | 2.80806100  | -1.50427400 |
| C | 5.34188700  | -0.43261100 | 0.05579000  |
| H | 4.93634800  | -0.96740000 | 0.93024700  |
| C | 5.77493100  | -1.47240900 | -0.97222400 |
| H | 6.54222400  | -2.14056800 | -0.55168900 |
| H | 4.90673600  | -2.07588400 | -1.26595100 |
| H | 6.18721400  | -0.97673900 | -1.86512800 |
| C | 6.50434500  | 0.44793700  | 0.49653500  |
| H | 6.18234800  | 1.15728700  | 1.27389500  |
| H | 7.31865000  | -0.16530300 | 0.90721000  |
| H | 6.90412400  | 1.01887900  | -0.35730700 |
| H | 1.12224000  | 0.77652100  | -0.03671800 |
| C | -1.81957900 | 0.47485000  | 0.03954200  |
| H | -1.38360800 | 0.18556200  | -0.92584400 |
| C | -0.88197700 | 0.04047500  | 1.17129100  |

|   |             |             |             |
|---|-------------|-------------|-------------|
| H | -1.42055700 | 0.18756900  | 2.13652000  |
| H | -0.73370000 | -1.05708800 | 1.08392100  |
| O | 0.26543000  | 0.77435800  | 1.09350300  |
| C | -2.19866400 | 1.92886500  | 0.02298000  |
| C | -2.76650400 | 2.49731000  | -1.12431700 |
| C | -1.95455400 | 2.75313300  | 1.12736900  |
| C | -3.08486300 | 3.85141500  | -1.17271100 |
| H | -2.96482900 | 1.85702600  | -1.98813900 |
| C | -2.27423600 | 4.10927900  | 1.08098800  |
| H | -1.45239300 | 2.33407800  | 1.99890500  |
| C | -2.83974600 | 4.66487200  | -0.06555100 |
| H | -3.52324100 | 4.27497700  | -2.07846500 |
| H | -2.06243100 | 4.74078500  | 1.94616700  |
| H | -3.08192300 | 5.72889400  | -0.09992800 |
| I | -3.64574100 | -0.77272100 | 0.08872500  |
| C | 1.90154600  | 0.20997800  | 2.51364800  |
| O | 1.39575800  | -0.71461100 | 3.00880700  |
| O | 2.63413000  | 1.07507100  | 2.23306700  |
| C | -1.94034100 | -4.28980300 | -0.74685100 |
| N | -2.87443500 | -4.95965500 | -0.88424000 |

### G2-IM3

|   |             |             |             |
|---|-------------|-------------|-------------|
| C | -0.53461200 | -0.76733400 | 2.70267000  |
| O | -0.23277500 | -1.78359500 | 3.31010000  |
| O | 0.19212100  | 0.15733600  | 2.25705100  |
| I | -3.36693100 | 1.03780100  | -1.05589100 |
| C | -2.27328200 | 0.58992200  | 1.82248400  |
| C | -1.70498900 | 0.75406300  | 0.39613300  |
| O | -1.89915400 | -0.61931300 | 2.41995300  |
| H | -1.93101000 | 1.44139700  | 2.43179700  |
| H | -3.36919900 | 0.58229900  | 1.80464100  |
| C | -0.71564100 | 1.85834300  | 0.16086200  |
| C | -0.85756500 | 3.12102500  | 0.74646700  |
| C | 0.38334700  | 1.63002800  | -0.67404500 |
| C | 0.08828200  | 4.11964200  | 0.52371400  |
| H | -1.72139200 | 3.33093300  | 1.38057800  |
| C | 1.32906800  | 2.62686800  | -0.89969300 |
| H | 0.50559900  | 0.65350700  | -1.14549200 |
| C | 1.18868600  | 3.87731800  | -0.29829600 |
| H | -0.03690900 | 5.09613100  | 0.99599200  |
| H | 2.18524500  | 2.41351300  | -1.54384200 |
| H | 1.93193500  | 4.65889800  | -0.46742800 |
| H | -1.29643900 | -0.20492700 | 0.05916700  |
| C | -1.45377600 | -2.29772400 | -1.78796400 |

|   |             |             |             |
|---|-------------|-------------|-------------|
| C | -0.16124400 | -1.83103700 | -1.95242400 |
| C | 0.78467500  | -1.86014300 | -0.89870900 |
| C | 0.36465800  | -2.42085600 | 0.32892100  |
| C | -0.93224200 | -2.88913400 | 0.50039500  |
| C | -1.85711600 | -2.83135600 | -0.55223700 |
| H | -2.17127200 | -2.23464800 | -2.60706600 |
| H | 0.16165900  | -1.40779800 | -2.90490100 |
| H | 1.03228000  | -2.45884200 | 1.18889300  |
| H | -1.23084500 | -3.25016100 | 1.48557900  |
| N | 2.03634800  | -1.35293100 | -1.18089000 |
| C | 2.82596300  | -0.79678000 | -0.30078700 |
| N | 4.12564800  | -0.52813800 | -0.69989400 |
| H | 4.55366800  | 0.27059100  | -0.24540400 |
| N | 2.50343200  | -0.44161400 | 0.95648100  |
| C | 4.54411500  | -0.73972500 | -2.07512900 |
| C | 6.06506200  | -0.83307500 | -2.11771200 |
| C | 4.01115200  | 0.34315200  | -3.01294900 |
| H | 4.10492500  | -1.69924000 | -2.37873400 |
| H | 6.42362800  | -1.63242800 | -1.45482500 |
| H | 6.41585000  | -1.03420300 | -3.14010100 |
| H | 6.52196800  | 0.11590600  | -1.78986700 |
| H | 2.91482700  | 0.36743800  | -2.95127100 |
| H | 4.41238100  | 1.33042600  | -2.72834200 |
| H | 4.30172900  | 0.14486400  | -4.05592800 |
| C | 3.37894800  | 0.09754800  | 1.98810300  |
| C | 3.16820400  | -0.69697800 | 3.27747700  |
| C | 3.10012800  | 1.58874200  | 2.18189500  |
| H | 4.42227200  | -0.05158300 | 1.66778100  |
| H | 3.48199900  | -1.74117400 | 3.13447100  |
| H | 3.75585900  | -0.26185400 | 4.10030000  |
| H | 2.10094500  | -0.70034700 | 3.54492500  |
| H | 3.29442200  | 2.14937300  | 1.25448500  |
| H | 2.03623500  | 1.71348300  | 2.43622000  |
| H | 3.72273500  | 2.00710900  | 2.98752800  |
| H | 1.50811700  | -0.38538200 | 1.24362600  |
| C | -3.20190100 | -3.31065600 | -0.38028400 |
| N | -4.28041800 | -3.71207000 | -0.26294200 |

### G2-TS3

|   |             |             |             |
|---|-------------|-------------|-------------|
| C | -0.72966300 | -1.26449300 | 2.54849600  |
| O | -0.33284900 | -2.24126900 | 3.14356200  |
| O | -0.04193700 | -0.33476300 | 1.99304000  |
| I | -3.09529500 | 1.48288000  | -1.11424200 |
| C | -2.40804300 | 0.15105300  | 1.77015900  |

|   |             |             |             |
|---|-------------|-------------|-------------|
| C | -1.37444600 | 0.52034300  | 0.71548100  |
| O | -2.07658300 | -1.07571600 | 2.38680100  |
| H | -2.48520400 | 0.95007600  | 2.52517400  |
| H | -3.38740200 | 0.00635000  | 1.30932400  |
| C | -0.52517700 | 1.73517100  | 0.67389400  |
| C | -0.63468700 | 2.76486800  | 1.61259100  |
| C | 0.47751200  | 1.81210100  | -0.30321200 |
| C | 0.23155800  | 3.85538200  | 1.56837100  |
| H | -1.40472300 | 2.72104200  | 2.38315400  |
| C | 1.33609200  | 2.90494600  | -0.35025400 |
| H | 0.56735800  | 1.00743500  | -1.03846600 |
| C | 1.21761100  | 3.93430600  | 0.58602700  |
| H | 0.12963700  | 4.65278500  | 2.30696400  |
| H | 2.10533000  | 2.95161700  | -1.12394100 |
| H | 1.89064300  | 4.79293400  | 0.55038000  |
| H | -1.15148100 | -0.25057900 | -0.01971100 |
| C | -1.64257000 | -1.98663000 | -1.96110900 |
| C | -0.34475000 | -1.52422700 | -2.11084700 |
| C | 0.66352100  | -1.81174200 | -1.16282400 |
| C | 0.30884400  | -2.64012600 | -0.07179100 |
| C | -0.98839800 | -3.10712500 | 0.08265900  |
| C | -1.98093300 | -2.78074200 | -0.85389700 |
| H | -2.41279100 | -1.70348800 | -2.67864900 |
| H | -0.07938400 | -0.88928500 | -2.95717300 |
| H | 1.04250300  | -2.88738400 | 0.69463300  |
| H | -1.24241000 | -3.69420000 | 0.96654700  |
| N | 1.91654400  | -1.27808000 | -1.39457700 |
| C | 2.73652800  | -0.90661900 | -0.45238100 |
| N | 4.02300600  | -0.56043100 | -0.82076000 |
| H | 4.48146900  | 0.10597400  | -0.21007600 |
| N | 2.45125300  | -0.82992400 | 0.86795700  |
| C | 4.38925600  | -0.45569800 | -2.22402600 |
| C | 5.90496400  | -0.55127700 | -2.34985100 |
| C | 3.83922900  | 0.81889100  | -2.86272200 |
| H | 3.92122500  | -1.31599900 | -2.72018400 |
| H | 6.27429400  | -1.48783600 | -1.90987800 |
| H | 6.21018200  | -0.51058400 | -3.40520700 |
| H | 6.39386300  | 0.28960400  | -1.82979400 |
| H | 2.74782800  | 0.84651300  | -2.74075800 |
| H | 4.27982700  | 1.70981000  | -2.38472300 |
| H | 4.07308500  | 0.85754200  | -3.93727200 |
| C | 3.32534200  | -0.34928500 | 1.92633800  |
| C | 2.99672300  | -1.11391000 | 3.20677500  |
| C | 3.17538000  | 1.16164400  | 2.11641900  |



|   |             |             |             |
|---|-------------|-------------|-------------|
| H | 4.36364200  | -0.59200400 | 1.64480200  |
| H | 3.18235200  | -2.18815000 | 3.06915200  |
| H | 3.61187800  | -0.74973600 | 4.04277900  |
| H | 1.93262200  | -0.99526000 | 3.45737400  |
| H | 3.44988600  | 1.71173200  | 1.20297200  |
| H | 2.11994000  | 1.39426500  | 2.33335000  |
| H | 3.80257700  | 1.52270000  | 2.94579000  |
| H | 1.45766000  | -0.81263000 | 1.14076000  |
| C | -3.32739600 | -3.25614600 | -0.68092900 |
| N | -4.40392200 | -3.65813500 | -0.55118300 |

**G2-IM4**

|   |             |             |             |
|---|-------------|-------------|-------------|
| C | 1.25130100  | 0.05960000  | -2.70011900 |
| O | 0.86210100  | -0.22016300 | -3.78877300 |
| O | 0.43861800  | 0.31485400  | -1.65163500 |
| I | 2.61418400  | -0.16996300 | 2.71608100  |
| C | 2.62286200  | 0.44439800  | -0.92557300 |
| C | 1.18187200  | 0.81739100  | -0.53196700 |
| O | 2.52439000  | 0.20669600  | -2.33400500 |
| H | 3.34093400  | 1.25135000  | -0.74435200 |
| H | 2.95691500  | -0.46543100 | -0.41002300 |
| C | 0.91235700  | 2.29377400  | -0.37225400 |
| C | 0.73685700  | 3.11275200  | -1.49298600 |
| C | 0.82769000  | 2.84776000  | 0.90877900  |
| C | 0.45753800  | 4.46949100  | -1.33725800 |
| H | 0.79799000  | 2.68789200  | -2.49837300 |
| C | 0.55059900  | 4.20656100  | 1.05990200  |
| H | 0.99250300  | 2.20059700  | 1.77640200  |
| C | 0.35835100  | 5.01780300  | -0.05831600 |
| H | 0.31218100  | 5.09831300  | -2.21754600 |
| H | 0.47928500  | 4.63129800  | 2.06275100  |
| H | 0.13411800  | 6.07895500  | 0.06571200  |
| H | 0.88851300  | 0.27213100  | 0.37361600  |
| C | 1.33003300  | -2.59809600 | -0.03074400 |
| C | 0.10316100  | -2.26619400 | 0.52790900  |
| C | -1.06881200 | -2.25632000 | -0.24995500 |
| C | -0.97151500 | -2.61198000 | -1.61161500 |
| C | 0.25047600  | -2.94143500 | -2.17778400 |
| C | 1.41484400  | -2.93286700 | -1.39172000 |
| H | 2.22127500  | -2.55883900 | 0.60073000  |
| H | 0.06023900  | -1.97101300 | 1.57820300  |
| H | -1.87605700 | -2.60678000 | -2.22233800 |
| H | 0.31934300  | -3.18509000 | -3.23841600 |
| N | -2.28281200 | -1.92094800 | 0.33509600  |

|   |             |             |             |
|---|-------------|-------------|-------------|
| C | -2.89914100 | -0.84201500 | -0.01414400 |
| N | -4.16027300 | -0.58863400 | 0.49274700  |
| H | -4.40987400 | 0.39158000  | 0.55683200  |
| N | -2.40711300 | 0.08945400  | -0.88209800 |
| C | -4.69141800 | -1.41762200 | 1.56581000  |
| C | -6.20374300 | -1.23903700 | 1.62017900  |
| C | -4.02750100 | -1.11547800 | 2.90800600  |
| H | -4.45095100 | -2.45304100 | 1.28879500  |
| H | -6.66058200 | -1.48022400 | 0.65048400  |
| H | -6.64392900 | -1.88680100 | 2.39135800  |
| H | -6.46291100 | -0.19724300 | 1.87361900  |
| H | -2.94188500 | -1.25634200 | 2.82604500  |
| H | -4.23212700 | -0.07607200 | 3.21354000  |
| H | -4.40824800 | -1.78371000 | 3.69471900  |
| C | -3.07438000 | 1.30440600  | -1.31435600 |
| C | -2.55918600 | 1.66990400  | -2.70228700 |
| C | -2.87632000 | 2.45984200  | -0.32737400 |
| H | -4.15149800 | 1.07790600  | -1.39608300 |
| H | -2.74693400 | 0.85587400  | -3.41551600 |
| H | -3.04123900 | 2.58785600  | -3.06714100 |
| H | -1.47329000 | 1.83907300  | -2.66215400 |
| H | -3.19302300 | 2.18008800  | 0.68928400  |
| H | -1.81152200 | 2.73403100  | -0.27629600 |
| H | -3.44943000 | 3.34654900  | -0.63818400 |
| H | -1.45111100 | -0.04665500 | -1.20586900 |
| C | 2.68167100  | -3.27648900 | -1.98381600 |
| N | 3.69350200  | -3.56647100 | -2.46241500 |

### G3-COM

|   |             |             |             |
|---|-------------|-------------|-------------|
| C | -2.32495200 | -0.40147900 | -0.26734600 |
| N | -2.32913400 | 0.88503200  | -0.16669200 |
| C | -1.13844800 | 1.61067300  | -0.16784700 |
| C | -0.69741600 | 2.23336400  | 1.01997200  |
| C | -0.42093100 | 1.81946600  | -1.36671800 |
| C | 0.42972900  | 3.05697100  | 0.98730400  |
| C | 0.70743700  | 2.64448200  | -1.35329300 |
| C | 1.15521600  | 3.27346600  | -0.18814700 |
| H | 0.75514400  | 3.54265000  | 1.91291000  |
| H | 1.24754000  | 2.80810100  | -2.29087500 |
| N | -3.50366300 | -1.06957800 | -0.49467300 |
| H | -3.54351800 | -2.03829800 | -0.20352800 |
| N | -1.18535600 | -1.16686000 | -0.21419300 |
| H | -0.41408100 | -0.71956700 | 0.27696900  |

|   |             |             |             |
|---|-------------|-------------|-------------|
| C | -1.14763400 | -2.62067700 | -0.18225200 |
| H | -1.88799500 | -2.98004800 | -0.91570800 |
| C | 0.22997600  | -3.08570400 | -0.64258400 |
| H | 0.45399200  | -2.69998000 | -1.64652500 |
| H | 1.00077100  | -2.71837900 | 0.05140300  |
| H | 0.28176800  | -4.18315100 | -0.66387600 |
| C | -1.48109800 | -3.17133700 | 1.20708600  |
| H | -1.48475100 | -4.27103700 | 1.21118300  |
| H | -0.72391500 | -2.81949600 | 1.92371400  |
| H | -2.46388100 | -2.81985700 | 1.55735100  |
| C | -4.77515000 | -0.35972000 | -0.49174000 |
| H | -4.59016800 | 0.58282000  | -1.02530200 |
| C | -5.80543500 | -1.18680900 | -1.24939800 |
| H | -6.76721100 | -0.65774200 | -1.29629800 |
| H | -5.46540800 | -1.39212800 | -2.27361800 |
| H | -5.98095600 | -2.15045000 | -0.74294200 |
| C | -5.23309400 | -0.02419200 | 0.92639600  |
| H | -4.45850400 | 0.56552800  | 1.43447300  |
| H | -6.16497700 | 0.55981900  | 0.91211600  |
| H | -5.41698200 | -0.94696000 | 1.50062400  |
| C | 2.39818100  | 4.12626600  | -0.18458800 |
| H | 3.25523500  | 3.57664000  | 0.23772800  |
| H | 2.67138500  | 4.43601000  | -1.20244700 |
| H | 2.26030600  | 5.03221400  | 0.42257300  |
| C | -1.46405400 | 1.99036100  | 2.29055400  |
| H | -1.03653500 | 2.55452600  | 3.13076200  |
| H | -2.51821300 | 2.27948200  | 2.16471800  |
| H | -1.46329100 | 0.91889500  | 2.54966700  |
| C | -0.90037700 | 1.16831000  | -2.63373700 |
| H | -0.81386900 | 0.07264100  | -2.56438900 |
| H | -1.96475400 | 1.39261400  | -2.79958900 |
| H | -0.32122200 | 1.51047500  | -3.50129500 |
| C | 1.89356400  | 0.15490000  | 2.30761400  |
| H | 1.29500500  | 0.98274200  | 2.69999000  |
| C | 2.00890800  | -0.01696600 | 0.84924700  |
| H | 1.47193200  | 0.69836700  | 0.21626800  |
| O | 1.16640900  | -0.85070900 | 1.63537900  |
| C | 3.19782100  | -0.65963900 | 0.22458100  |
| C | 3.74009600  | -1.83721300 | 0.74945000  |
| C | 3.78189000  | -0.07260000 | -0.90031300 |
| C | 4.86437100  | -2.41124600 | 0.16181400  |
| H | 3.26068200  | -2.30758300 | 1.61118400  |
| C | 4.90987400  | -0.64667100 | -1.48514200 |
| H | 3.34116000  | 0.83650600  | -1.31757500 |

|   |            |             |             |
|---|------------|-------------|-------------|
| C | 5.45388100 | -1.81533600 | -0.95424600 |
| H | 5.28139900 | -3.33205800 | 0.57284500  |
| H | 5.36204000 | -0.18273900 | -2.36305100 |
| H | 6.33367600 | -2.26746200 | -1.41446900 |
| H | 2.70987300 | -0.20959600 | 2.94087900  |

**G3-IM1**

|   |             |             |             |
|---|-------------|-------------|-------------|
| C | -3.51286200 | 0.10576600  | 0.05463800  |
| N | -3.21135700 | -1.09864700 | 0.39305400  |
| C | -1.94311800 | -1.35630300 | 0.94019800  |
| C | -0.95803500 | -1.97611100 | 0.14578100  |
| C | -1.65997400 | -1.04478300 | 2.28431300  |
| C | 0.28423300  | -2.28478200 | 0.70208400  |
| C | -0.40490500 | -1.36861800 | 2.80750800  |
| C | 0.58126700  | -1.99043900 | 2.03828000  |
| H | 1.06615800  | -2.72362400 | 0.07372600  |
| H | -0.19109700 | -1.12020400 | 3.85218300  |
| N | -4.80548000 | 0.39801000  | -0.35886900 |
| H | -4.87908600 | 1.16279400  | -1.02028600 |
| N | -2.64890100 | 1.16704200  | 0.12206200  |
| H | -1.65599200 | 0.92316400  | 0.15077700  |
| C | -2.92729600 | 2.51733800  | -0.32818800 |
| H | -3.98572500 | 2.72676000  | -0.10159800 |
| C | -2.07477200 | 3.49139700  | 0.47976700  |
| H | -2.29790800 | 3.39995600  | 1.55150400  |
| H | -1.01063500 | 3.26059700  | 0.32637600  |
| H | -2.25959200 | 4.52840800  | 0.16372700  |
| C | -2.67892200 | 2.68228100  | -1.83107300 |
| H | -2.93343400 | 3.69765100  | -2.17113200 |
| H | -1.61503000 | 2.49397900  | -2.03886200 |
| H | -3.27049300 | 1.96039700  | -2.41580100 |
| C | -5.73935100 | -0.69011400 | -0.60622200 |
| H | -5.61008500 | -1.38916200 | 0.23125700  |
| C | -7.15755300 | -0.13309400 | -0.59973900 |
| H | -7.89383000 | -0.93648800 | -0.74417500 |
| H | -7.36978000 | 0.37706100  | 0.34988000  |
| H | -7.29401200 | 0.59380800  | -1.41811300 |
| C | -5.41972000 | -1.43663500 | -1.90070500 |
| H | -4.39024500 | -1.81636000 | -1.85857700 |
| H | -6.10297000 | -2.28656300 | -2.04753400 |
| H | -5.52074700 | -0.76317200 | -2.76828000 |
| C | 1.93531000  | -2.33377800 | 2.60294200  |
| H | 1.97621000  | -3.39111000 | 2.91154900  |
| H | 2.71669200  | -2.18639900 | 1.83972700  |

|   |             |             |             |
|---|-------------|-------------|-------------|
| H | 2.16748300  | -1.71959300 | 3.48543200  |
| C | -1.26491600 | -2.28663300 | -1.29497100 |
| H | -0.39246300 | -2.73212800 | -1.79235300 |
| H | -2.11711500 | -2.98075500 | -1.36937300 |
| H | -1.55351800 | -1.37519200 | -1.84401000 |
| C | -2.71286100 | -0.37383300 | 3.12466300  |
| H | -2.91413900 | 0.64619000  | 2.75926400  |
| H | -3.66412200 | -0.92430400 | 3.06613900  |
| H | -2.39914800 | -0.31051800 | 4.17561400  |
| C | 1.06355600  | 0.51492200  | -1.37438000 |
| H | 0.76092200  | -0.52493100 | -1.51760500 |
| C | 1.42201400  | 0.95327600  | -0.02748900 |
| H | 1.34156600  | 0.20106900  | 0.76502300  |
| O | 0.17690400  | 1.33157600  | -0.60743700 |
| C | 2.42299400  | 2.03718800  | 0.18572200  |
| C | 2.12737600  | 3.36734500  | -0.12070200 |
| C | 3.69057300  | 1.70433500  | 0.67835900  |
| C | 3.08373400  | 4.36402700  | 0.07898500  |
| H | 1.14074800  | 3.61013300  | -0.51955600 |
| C | 4.64307000  | 2.70193700  | 0.87020400  |
| H | 3.92723600  | 0.65259600  | 0.86326100  |
| C | 4.34249000  | 4.03406700  | 0.57739300  |
| H | 2.84342900  | 5.40270300  | -0.15812700 |
| H | 5.63374200  | 2.43363400  | 1.24177300  |
| H | 5.09297100  | 4.81225600  | 0.73074200  |
| H | 1.53890700  | 1.01568700  | -2.22313000 |
| I | 3.80200100  | -1.84581700 | -1.05071500 |

### G3-TS1

|   |             |             |             |
|---|-------------|-------------|-------------|
| C | 3.21609000  | 0.20095200  | 0.00359100  |
| N | 3.02812600  | -0.94378200 | -0.55857000 |
| C | 1.91019900  | -1.72792100 | -0.25102900 |
| C | 1.93266800  | -2.60852100 | 0.84526000  |
| C | 0.77538500  | -1.69049600 | -1.08666900 |
| C | 0.83799100  | -3.44820400 | 1.07289900  |
| C | -0.29231200 | -2.55048800 | -0.83617700 |
| C | -0.28263200 | -3.44194600 | 0.24217300  |
| H | 0.86017100  | -4.11952000 | 1.93716700  |
| H | -1.18338100 | -2.49753700 | -1.47063900 |
| N | 4.29372900  | 0.97124400  | -0.41457200 |
| H | 4.65241000  | 1.61325800  | 0.28159600  |
| N | 2.44821000  | 0.73595100  | 1.00250900  |
| H | 1.52476900  | 0.28098600  | 1.13845100  |
| C | 2.34974000  | 2.17478700  | 1.24751400  |

|   |             |             |             |
|---|-------------|-------------|-------------|
| H | 3.36334700  | 2.61069100  | 1.23285600  |
| C | 1.50273400  | 2.85326700  | 0.17080800  |
| H | 1.95368000  | 2.69128100  | -0.82034900 |
| H | 0.49712100  | 2.40609100  | 0.19068900  |
| H | 1.41752800  | 3.93694200  | 0.34630200  |
| C | 1.77525800  | 2.39897100  | 2.64300800  |
| H | 1.68426900  | 3.47557500  | 2.85108600  |
| H | 0.78284700  | 1.92792700  | 2.68797500  |
| H | 2.42532400  | 1.94149600  | 3.40330000  |
| C | 5.30056200  | 0.40535200  | -1.29388600 |
| H | 4.74708200  | -0.14392300 | -2.06816700 |
| C | 6.08755200  | 1.54229700  | -1.93523800 |
| H | 6.83304000  | 1.15272600  | -2.64350900 |
| H | 5.41350400  | 2.22654800  | -2.46853300 |
| H | 6.62810700  | 2.12177900  | -1.16778700 |
| C | 6.21272900  | -0.58678200 | -0.57286700 |
| H | 5.60214300  | -1.38852000 | -0.13727000 |
| H | 6.94099500  | -1.03392600 | -1.26688500 |
| H | 6.77137900  | -0.08094100 | 0.23225600  |
| C | -1.48014400 | -4.31797500 | 0.50539600  |
| H | -2.39972400 | -3.71141600 | 0.53087300  |
| H | -1.60905800 | -5.07056500 | -0.28868700 |
| H | -1.38269400 | -4.84907200 | 1.46284600  |
| C | 3.13336500  | -2.61461500 | 1.75185900  |
| H | 3.01427500  | -3.34780100 | 2.56155100  |
| H | 4.04755300  | -2.85663300 | 1.18703800  |
| H | 3.28510800  | -1.61923400 | 2.19885000  |
| C | 0.72764000  | -0.67948100 | -2.19885800 |
| H | 0.72855900  | 0.34175200  | -1.78010600 |
| H | 1.61662800  | -0.75782600 | -2.84276700 |
| H | -0.17951600 | -0.80206600 | -2.80773000 |
| C | -1.41239600 | -0.25599400 | 1.53310100  |
| H | -1.32146100 | -1.35824900 | 1.52198400  |
| C | -1.80903800 | 0.29145700  | 0.22458800  |
| H | -1.30573400 | -0.17303200 | -0.61991500 |
| O | -0.25049500 | 0.45382200  | 1.42330300  |
| C | -2.13898200 | 1.72742500  | 0.06541500  |
| C | -2.32810900 | 2.56276300  | 1.17356400  |
| C | -2.21051300 | 2.28470700  | -1.21656500 |
| C | -2.58240800 | 3.91965000  | 1.00021900  |
| H | -2.23316500 | 2.14459600  | 2.17585000  |
| C | -2.46737000 | 3.64233200  | -1.39110700 |
| H | -2.07168500 | 1.63108100  | -2.08091800 |
| C | -2.65383100 | 4.46696300  | -0.28209100 |

|   |             |             |             |
|---|-------------|-------------|-------------|
| H | -2.71625500 | 4.55987500  | 1.87454400  |
| H | -2.51957800 | 4.05904900  | -2.39884100 |
| H | -2.84976400 | 5.53269500  | -0.41542700 |
| H | -2.09154500 | 0.03508500  | 2.36400700  |
| I | -4.03656300 | -0.88952200 | -0.47138000 |

**G3-IM2**

|   |             |             |             |
|---|-------------|-------------|-------------|
| C | -2.95088800 | -0.01320300 | 0.05381800  |
| N | -2.64182800 | -1.25574100 | 0.24033600  |
| C | -1.33712400 | -1.70041700 | 0.43101400  |
| C | -0.62520100 | -2.32929600 | -0.61309500 |
| C | -0.75691300 | -1.63781100 | 1.71783100  |
| C | 0.59637400  | -2.94753900 | -0.33319300 |
| C | 0.47305200  | -2.25538000 | 1.95327100  |
| C | 1.16031100  | -2.93951000 | 0.94529900  |
| H | 1.13911200  | -3.43124700 | -1.15151400 |
| H | 0.90821800  | -2.20029300 | 2.95693600  |
| N | -4.30013300 | 0.32741500  | 0.12125000  |
| H | -4.56905500 | 1.13421700  | -0.42808800 |
| N | -2.06596300 | 0.99915600  | -0.14251900 |
| H | -1.15204300 | 0.73900000  | -0.66171400 |
| C | -2.49447300 | 2.32398100  | -0.57453600 |
| H | -3.36909000 | 2.62508300  | 0.02971100  |
| C | -1.37040300 | 3.31926400  | -0.30826400 |
| H | -1.10023000 | 3.32823100  | 0.75731600  |
| H | -0.49142400 | 3.00071500  | -0.88687000 |
| H | -1.66856900 | 4.33430900  | -0.61369200 |
| C | -2.84794300 | 2.32179300  | -2.06850900 |
| H | -3.14825400 | 3.32333600  | -2.41553400 |
| H | -1.94915200 | 1.98684900  | -2.60965000 |
| H | -3.66423300 | 1.61609600  | -2.29441400 |
| C | -5.31565000 | -0.70351400 | 0.21427900  |
| H | -4.92961500 | -1.43987800 | 0.93244200  |
| C | -6.60200100 | -0.08596400 | 0.75219000  |
| H | -7.38308100 | -0.85011800 | 0.87793700  |
| H | -6.42142600 | 0.40169600  | 1.72019600  |
| H | -6.98955200 | 0.67428000  | 0.05297800  |
| C | -5.53958500 | -1.41869100 | -1.11837400 |
| H | -4.58808700 | -1.84613500 | -1.46118600 |
| H | -6.27838300 | -2.22905800 | -1.01834200 |
| H | -5.90895400 | -0.70903300 | -1.87765300 |
| C | 2.46277200  | -3.64129000 | 1.23478300  |
| H | 3.11452600  | -3.02123300 | 1.86761600  |
| H | 2.29524500  | -4.59771600 | 1.75799300  |

|   |             |             |             |
|---|-------------|-------------|-------------|
| H | 3.00940100  | -3.85252800 | 0.30544200  |
| C | -1.17406000 | -2.25966200 | -2.00949300 |
| H | -0.59140200 | -2.88856900 | -2.69744500 |
| H | -2.22861300 | -2.57440700 | -2.03169700 |
| H | -1.11996900 | -1.20745500 | -2.34534600 |
| C | -1.49292600 | -0.89653800 | 2.79966400  |
| H | -1.62589000 | 0.16026500  | 2.51433600  |
| H | -2.50338500 | -1.31380000 | 2.93361900  |
| H | -0.95180100 | -0.94184600 | 3.75581400  |
| C | 1.14869800  | 0.37445200  | -1.88896800 |
| H | 1.27335100  | -0.65029600 | -2.33080100 |
| C | 1.73825500  | 0.28284900  | -0.46918500 |
| H | 1.24212100  | -0.51791200 | 0.08874000  |
| O | -0.12029900 | 0.80666400  | -1.81458100 |
| C | 1.72553500  | 1.54972700  | 0.32878400  |
| C | 2.19412200  | 2.75935600  | -0.19862900 |
| C | 1.20641500  | 1.53939200  | 1.62697400  |
| C | 2.14165200  | 3.92814000  | 0.55437500  |
| H | 2.59821300  | 2.77354600  | -1.21321200 |
| C | 1.15866600  | 2.70855400  | 2.38675700  |
| H | 0.82965000  | 0.59680700  | 2.03100200  |
| C | 1.62585200  | 3.90743200  | 1.85269000  |
| H | 2.50466600  | 4.86536000  | 0.12712300  |
| H | 0.74468700  | 2.68064300  | 3.39683700  |
| H | 1.58580300  | 4.82590700  | 2.44197300  |
| H | 1.82735000  | 1.02737700  | -2.49940400 |
| I | 3.82699100  | -0.48845400 | -0.57821100 |

### G3-TS2

|   |             |             |             |
|---|-------------|-------------|-------------|
| C | 2.80215500  | 0.23427500  | -0.36038900 |
| N | 2.68834800  | -1.06728100 | -0.29992500 |
| C | 1.51237200  | -1.77868500 | -0.39766200 |
| C | 0.58815500  | -1.65016000 | -1.46504000 |
| C | 1.30455800  | -2.82453100 | 0.54402100  |
| C | -0.51899800 | -2.50641700 | -1.52443300 |
| C | 0.19251500  | -3.65243300 | 0.44217000  |
| C | -0.75061500 | -3.50676600 | -0.58252100 |
| H | -1.22784900 | -2.38500600 | -2.35105000 |
| H | 0.05198400  | -4.43804100 | 1.19206000  |
| N | 4.10828200  | 0.71600100  | -0.49520900 |
| H | 4.24903100  | 1.63031400  | -0.08415700 |
| N | 1.80136800  | 1.12802000  | -0.27931000 |
| C | 2.06912200  | 2.55324400  | -0.34775400 |
| H | 2.90983700  | 2.83253900  | 0.32593900  |



|   |             |             |             |
|---|-------------|-------------|-------------|
| C | 2.42151500  | 2.99922100  | -1.77221000 |
| H | 2.67027100  | 4.07251100  | -1.80224200 |
| H | 3.27061500  | 2.42594300  | -2.16817500 |
| H | 1.55348700  | 2.82717600  | -2.42775200 |
| C | 0.86145700  | 3.33505300  | 0.15986300  |
| H | 0.59462900  | 3.01641300  | 1.17501300  |
| H | 1.07668000  | 4.41499600  | 0.14840200  |
| H | -0.01122100 | 3.14710100  | -0.48446400 |
| C | 5.24613700  | -0.18118000 | -0.38212800 |
| H | 5.03158800  | -0.93575800 | 0.39403500  |
| C | 5.48648300  | -0.92137900 | -1.69523600 |
| H | 6.32566100  | -1.62843400 | -1.59957900 |
| H | 4.58183400  | -1.48125000 | -1.96360700 |
| H | 5.71694300  | -0.20196100 | -2.49706700 |
| C | 6.46965500  | 0.63223800  | 0.02517400  |
| H | 6.31245800  | 1.12467900  | 0.99713500  |
| H | 7.35552800  | -0.01361100 | 0.10712800  |
| H | 6.68079600  | 1.40907900  | -0.72767400 |
| H | 0.82612400  | 0.81259000  | 0.43615500  |
| C | -1.93284000 | 0.27099400  | -0.01120500 |
| H | -1.43259900 | -0.05426300 | -0.93109600 |
| C | -1.10035600 | -0.13787900 | 1.21266600  |
| H | -1.75011400 | -0.08305800 | 2.11334200  |
| H | -0.84584000 | -1.21003200 | 1.08569300  |
| O | -0.02015200 | 0.69346200  | 1.33393100  |
| C | -2.30466400 | 1.71824300  | -0.10501100 |
| C | -2.50197200 | 2.30617400  | -1.35951300 |
| C | -2.40737700 | 2.51962500  | 1.03732500  |
| C | -2.79142500 | 3.66373800  | -1.47687000 |
| H | -2.41427900 | 1.68383600  | -2.25400400 |
| C | -2.69574600 | 3.87684900  | 0.92259900  |
| H | -2.21161900 | 2.07942700  | 2.01541900  |
| C | -2.88735900 | 4.45528200  | -0.33289600 |
| H | -2.93053200 | 4.10741900  | -2.46468000 |
| H | -2.75205600 | 4.49432400  | 1.82124200  |
| H | -3.10103700 | 5.52237000  | -0.41911500 |
| I | -3.77564000 | -0.95991700 | -0.06126300 |
| C | 1.51875600  | 0.49724100  | 3.09771100  |
| O | 0.99752600  | -0.38525900 | 3.64424400  |
| O | 2.18689800  | 1.37215600  | 2.72708500  |
| C | -1.95663100 | -4.40692500 | -0.66094100 |
| H | -1.66526200 | -5.46627500 | -0.75022100 |
| H | -2.58524900 | -4.31081500 | 0.23847300  |
| H | -2.58325800 | -4.14972300 | -1.52665500 |

|   |            |             |             |
|---|------------|-------------|-------------|
| C | 2.31659800 | -3.01494700 | 1.63816300  |
| H | 3.32404200 | -3.12521500 | 1.20965800  |
| H | 2.35002400 | -2.13472300 | 2.29617000  |
| H | 2.07634700 | -3.89658600 | 2.24956300  |
| C | 0.81047100 | -0.64191000 | -2.55886500 |
| H | 0.53774100 | 0.37427400  | -2.23169400 |
| H | 1.87955900 | -0.59193600 | -2.82177300 |
| H | 0.23265800 | -0.90654800 | -3.45658300 |

**G3-IM3**

|   |             |             |             |
|---|-------------|-------------|-------------|
| C | 2.83958900  | -0.35738100 | -0.16435000 |
| N | 2.34598500  | -1.03537500 | -1.15087900 |
| C | 1.07801600  | -1.62102600 | -1.10217100 |
| C | 0.18384900  | -1.31852200 | -2.15824700 |
| C | 0.68104000  | -2.55815000 | -0.12002600 |
| C | -1.11076300 | -1.83773900 | -2.14215500 |
| C | -0.62655800 | -3.05269700 | -0.14171900 |
| C | -1.55109900 | -2.67848200 | -1.11660900 |
| H | -1.80219700 | -1.55786500 | -2.94234300 |
| H | -0.93704500 | -3.71392600 | 0.67082100  |
| N | 4.15867300  | 0.07919600  | -0.27374100 |
| H | 4.35079500  | 0.94500900  | 0.21623300  |
| N | 2.18720600  | 0.00348700  | 0.97196100  |
| C | 2.76705000  | 0.55799800  | 2.18916000  |
| H | 3.73734300  | 1.01680000  | 1.94516900  |
| C | 1.84986800  | 1.65035400  | 2.73823900  |
| H | 2.27157000  | 2.07804700  | 3.66092500  |
| H | 1.71277700  | 2.45344500  | 1.99930300  |
| H | 0.86827700  | 1.20658900  | 2.95925400  |
| C | 3.01083000  | -0.53970000 | 3.22569700  |
| H | 3.66540500  | -1.31892000 | 2.80826800  |
| H | 3.48333900  | -0.12583900 | 4.13036400  |
| H | 2.04224400  | -0.98802800 | 3.49194100  |
| C | 4.85336900  | -0.03561000 | -1.54448100 |
| H | 4.62196500  | -1.04015700 | -1.92308600 |
| C | 4.35620400  | 0.98359500  | -2.56983900 |
| H | 4.85126500  | 0.84611300  | -3.54348000 |
| H | 3.27336200  | 0.86144700  | -2.70639100 |
| H | 4.56417000  | 2.01018400  | -2.22330900 |
| C | 6.35230700  | 0.08999700  | -1.29808600 |
| H | 6.69114600  | -0.66647100 | -0.57711500 |
| H | 6.91461600  | -0.03250500 | -2.23513400 |
| H | 6.59727200  | 1.08554800  | -0.89067500 |
| H | 1.24593100  | -0.37931500 | 1.13247500  |

|   |             |             |             |
|---|-------------|-------------|-------------|
| C | -2.98042100 | -3.14326200 | -1.02049800 |
| H | -3.04134000 | -4.23754400 | -0.91681100 |
| H | -3.45059500 | -2.69937900 | -0.12865000 |
| H | -3.56273200 | -2.84043700 | -1.90235700 |
| C | 1.62361100  | -3.04120300 | 0.95016500  |
| H | 2.67202600  | -2.87385900 | 0.66438500  |
| H | 1.41253400  | -2.52501200 | 1.89885300  |
| H | 1.46820300  | -4.11480100 | 1.12641700  |
| C | 0.64855100  | -0.44585700 | -3.29406400 |
| H | 0.81137700  | 0.59882000  | -2.98113000 |
| H | 1.61420700  | -0.80677600 | -3.67917900 |
| H | -0.08981000 | -0.43899000 | -4.10769900 |
| C | -1.05461200 | -1.56314300 | 2.51376100  |
| O | -1.05764700 | -2.72632100 | 2.87342500  |
| O | -0.11145100 | -0.74689300 | 2.37159400  |
| I | -3.51149100 | 0.73883000  | -0.94197400 |
| C | -2.36053800 | 0.32333800  | 1.90190600  |
| C | -1.82335600 | 0.63007200  | 0.49476200  |
| O | -2.33614600 | -1.03819500 | 2.19312400  |
| H | -1.73016400 | 0.88128700  | 2.61278300  |
| H | -3.40122600 | 0.66138000  | 2.00998200  |
| C | -1.02142400 | 1.88711000  | 0.35706800  |
| C | -1.37261100 | 3.06055300  | 1.03657700  |
| C | 0.11734600  | 1.89682600  | -0.45485000 |
| C | -0.60532500 | 4.21482400  | 0.90317200  |
| H | -2.26336600 | 3.07043900  | 1.66911900  |
| C | 0.88224800  | 3.05267300  | -0.59693200 |
| H | 0.40905000  | 0.97783100  | -0.96508100 |
| C | 0.52372900  | 4.21687500  | 0.08132700  |
| H | -0.89067200 | 5.12018800  | 1.44242000  |
| H | 1.77118700  | 3.03241400  | -1.23159100 |
| H | 1.12345300  | 5.12315800  | -0.02287100 |
| H | -1.26183700 | -0.23542400 | 0.11943000  |

### G3-TS3

|   |             |             |             |
|---|-------------|-------------|-------------|
| C | 2.90010600  | -0.27104600 | -0.30207800 |
| N | 2.35921900  | -0.93380300 | -1.27425100 |
| C | 1.13979600  | -1.60279400 | -1.13354400 |
| C | 0.14088300  | -1.33798200 | -2.10387900 |
| C | 0.87717500  | -2.57078700 | -0.13609900 |
| C | -1.11344000 | -1.93721500 | -1.99503400 |
| C | -0.40384300 | -3.12650800 | -0.04767600 |
| C | -1.42353200 | -2.80679100 | -0.94417800 |
| H | -1.88885200 | -1.67337500 | -2.71853800 |

|   |             |             |             |
|---|-------------|-------------|-------------|
| H | -0.60918800 | -3.81207300 | 0.78027800  |
| N | 4.17178900  | 0.26422600  | -0.49488000 |
| H | 4.32533100  | 1.13512500  | 0.00289300  |
| N | 2.33889900  | -0.02896400 | 0.90903700  |
| C | 2.97008500  | 0.50246000  | 2.10848400  |
| H | 4.03072300  | 0.68738200  | 1.88060300  |
| C | 2.30214900  | 1.81487800  | 2.51937000  |
| H | 2.73701500  | 2.20236600  | 3.45338000  |
| H | 2.41116400  | 2.57562200  | 1.73311300  |
| H | 1.22527800  | 1.63907200  | 2.67001500  |
| C | 2.91588200  | -0.52951900 | 3.23671300  |
| H | 3.48635300  | -1.42772300 | 2.96108900  |
| H | 3.34436700  | -0.11161100 | 4.16064300  |
| H | 1.87497700  | -0.83343700 | 3.42877600  |
| C | 4.77152000  | 0.23681500  | -1.81893100 |
| H | 4.57874200  | -0.76979400 | -2.21324900 |
| C | 4.12708300  | 1.24829700  | -2.76662700 |
| H | 4.55684300  | 1.17752700  | -3.77747400 |
| H | 3.04860900  | 1.05176800  | -2.82920100 |
| H | 4.28750900  | 2.27598900  | -2.39925300 |
| C | 6.27355900  | 0.45876000  | -1.68292600 |
| H | 6.71742600  | -0.29356900 | -1.01672400 |
| H | 6.76805300  | 0.40332200  | -2.66343400 |
| H | 6.48233100  | 1.45621400  | -1.26078300 |
| H | 1.37243400  | -0.33518700 | 1.06275300  |
| C | -2.81339400 | -3.36180200 | -0.76757900 |
| H | -2.89508600 | -4.39092900 | -1.15437400 |
| H | -3.07835500 | -3.38164100 | 0.29988200  |
| H | -3.54981300 | -2.73548500 | -1.29056500 |
| C | 1.92932400  | -3.02763400 | 0.83997800  |
| H | 2.93804000  | -2.75142900 | 0.50490700  |
| H | 1.74301300  | -2.60035200 | 1.83652400  |
| H | 1.88195900  | -4.12134500 | 0.94732600  |
| C | 0.44450600  | -0.39685900 | -3.23850500 |
| H | 0.61413400  | 0.63269900  | -2.88450000 |
| H | 1.36783400  | -0.70266200 | -3.75344800 |
| H | -0.38688200 | -0.37050400 | -3.95525000 |
| C | -0.75295100 | -1.40258600 | 2.56317700  |
| O | -0.21206400 | -2.29101000 | 3.18568500  |
| O | -0.23584900 | -0.36525200 | 2.02417700  |
| I | -3.60643300 | 0.79858400  | -1.10685500 |
| C | -2.64475900 | -0.27805800 | 1.82253100  |
| C | -1.72374500 | 0.25812400  | 0.73777100  |
| O | -2.11675300 | -1.46247300 | 2.37483300  |

|   |             |             |             |
|---|-------------|-------------|-------------|
| H | -2.77275900 | 0.48437300  | 2.60894300  |
| H | -3.62460000 | -0.53528700 | 1.41542200  |
| C | -1.13481900 | 1.61535100  | 0.68335100  |
| C | -1.53870700 | 2.66190200  | 1.51818700  |
| C | -0.08540200 | 1.83582700  | -0.21830200 |
| C | -0.91407400 | 3.90510200  | 1.44126300  |
| H | -2.36158500 | 2.51637700  | 2.21890800  |
| C | 0.53013100  | 3.07905600  | -0.30252100 |
| H | 0.24182600  | 1.01125100  | -0.85425200 |
| C | 0.11729200  | 4.12251600  | 0.52776700  |
| H | -1.24406000 | 4.71446800  | 2.09518400  |
| H | 1.34409500  | 3.22829100  | -1.01545800 |
| H | 0.59882200  | 5.10023300  | 0.46588200  |
| H | -1.34173900 | -0.46804200 | 0.02210000  |

### G3-IM4

|   |             |             |             |
|---|-------------|-------------|-------------|
| C | 3.09202000  | -0.40289800 | -0.26113400 |
| N | 2.60526600  | -1.57174100 | -0.49233400 |
| C | 1.35457900  | -1.95195300 | 0.01478800  |
| C | 0.28700800  | -2.12676200 | -0.89333700 |
| C | 1.15101600  | -2.22507100 | 1.38422300  |
| C | -0.95587800 | -2.55647000 | -0.42846300 |
| C | -0.11619600 | -2.63549800 | 1.81396500  |
| C | -1.18551900 | -2.79898500 | 0.92999800  |
| H | -1.78824800 | -2.63338400 | -1.13182800 |
| H | -0.27152300 | -2.81096300 | 2.88330000  |
| N | 4.36214700  | -0.09335800 | -0.73330600 |
| H | 4.51519100  | 0.88815500  | -0.93448300 |
| N | 2.47092500  | 0.59058800  | 0.44366700  |
| C | 3.02939900  | 1.89543500  | 0.75281300  |
| H | 4.12163700  | 1.77154200  | 0.84541300  |
| C | 2.72413000  | 2.91364300  | -0.35034300 |
| H | 3.18277700  | 3.88978100  | -0.13012100 |
| H | 3.09322300  | 2.56783700  | -1.32859300 |
| H | 1.63452600  | 3.04976200  | -0.43791900 |
| C | 2.50688700  | 2.38074900  | 2.10150500  |
| H | 2.67539100  | 1.62856500  | 2.88500100  |
| H | 3.00981200  | 3.31623000  | 2.38591300  |
| H | 1.42648800  | 2.56900600  | 2.04357600  |
| C | 5.02122100  | -0.99714000 | -1.66361200 |
| H | 4.85297000  | -2.00716200 | -1.26617800 |
| C | 4.41232800  | -0.92906600 | -3.06296700 |
| H | 4.88727200  | -1.65669600 | -3.73833500 |
| H | 3.33907400  | -1.15284500 | -3.00629200 |

|   |             |             |             |
|---|-------------|-------------|-------------|
| H | 4.54809500  | 0.07679900  | -3.49467400 |
| C | 6.51377700  | -0.68927900 | -1.67284700 |
| H | 6.93369800  | -0.76832600 | -0.66063800 |
| H | 7.05099700  | -1.38226400 | -2.33600600 |
| H | 6.69731000  | 0.33368500  | -2.04273300 |
| H | 1.56192500  | 0.36877100  | 0.84351500  |
| C | -2.55439900 | -3.20650900 | 1.41241900  |
| H | -2.65578800 | -4.30330400 | 1.45547200  |
| H | -2.74405800 | -2.81206200 | 2.42190500  |
| H | -3.32669500 | -2.81940900 | 0.72961500  |
| C | 2.27673600  | -2.05069000 | 2.36788900  |
| H | 3.21749800  | -2.43937000 | 1.95026900  |
| H | 2.43430700  | -0.98605500 | 2.60329700  |
| H | 2.05391400  | -2.56321200 | 3.31275200  |
| C | 0.48948300  | -1.79867100 | -2.34746900 |
| H | 0.87511000  | -0.77332500 | -2.46494100 |
| H | 1.23560700  | -2.47030000 | -2.80186400 |
| H | -0.45837200 | -1.87575000 | -2.89617800 |
| C | -0.57416700 | 0.05881500  | 3.04841400  |
| O | 0.11561600  | -0.18245100 | 3.98831700  |
| O | -0.12810700 | 0.62185700  | 1.90895800  |
| I | -3.89361600 | -0.42797800 | -1.56949300 |
| C | -2.42017400 | 0.34199300  | 1.73802100  |
| C | -1.16491700 | 0.67698400  | 0.91112200  |
| O | -1.88787200 | -0.15351300 | 2.97133700  |
| H | -3.03489800 | 1.22955100  | 1.94662700  |
| H | -3.03018200 | -0.42405500 | 1.24608900  |
| C | -1.12447700 | 2.02855300  | 0.24812300  |
| C | -1.01566900 | 3.18921900  | 1.02080100  |
| C | -1.16417700 | 2.12800300  | -1.14393300 |
| C | -0.93351200 | 4.43878700  | 0.41037400  |
| H | -0.98133000 | 3.11018100  | 2.11072400  |
| C | -1.08646100 | 3.38025400  | -1.75425200 |
| H | -1.29488900 | 1.21914400  | -1.73613900 |
| C | -0.96520100 | 4.53458500  | -0.98168400 |
| H | -0.84403000 | 5.33899800  | 1.02122200  |
| H | -1.12657700 | 3.44965900  | -2.84234500 |
| H | -0.90016400 | 5.51215800  | -1.46341600 |
| H | -0.98092000 | -0.11225200 | 0.16957600  |

**G4-COM**

|   |             |             |             |
|---|-------------|-------------|-------------|
| C | -3.74844800 | -1.10999500 | 0.12239900  |
| N | -2.88188400 | -1.89488800 | -0.43196500 |
| C | -1.51575500 | -1.64482300 | -0.37920400 |

|   |             |             |             |
|---|-------------|-------------|-------------|
| C | -0.74898800 | -1.82360000 | -1.54696700 |
| C | -0.82343900 | -1.26349400 | 0.78640900  |
| C | 0.61600300  | -1.55911900 | -1.57287800 |
| H | -1.26895100 | -2.15531300 | -2.44742200 |
| C | 0.54471100  | -1.01002600 | 0.76309600  |
| H | -1.37354700 | -1.15219600 | 1.72212000  |
| C | 1.29356500  | -1.12935700 | -0.41988300 |
| H | 1.18506000  | -1.66657300 | -2.49810600 |
| H | 1.05115200  | -0.68696000 | 1.67679200  |
| N | -5.07076500 | -1.49452500 | 0.13896900  |
| H | -5.75966800 | -0.75810800 | 0.22314200  |
| N | -3.46759100 | 0.08514100  | 0.73218000  |
| H | -2.52753000 | 0.45312400  | 0.59566200  |
| C | -4.44184100 | 1.05208800  | 1.20684800  |
| H | -5.26661000 | 0.49123000  | 1.67660300  |
| C | -3.79575400 | 1.91226200  | 2.28825400  |
| H | -4.51242500 | 2.64950800  | 2.67627500  |
| H | -3.44798800 | 1.28584700  | 3.12091100  |
| H | -2.93009100 | 2.44753500  | 1.87108200  |
| C | -4.99070900 | 1.91409200  | 0.06632100  |
| H | -5.42966600 | 1.29331100  | -0.72952000 |
| H | -5.75848700 | 2.61496100  | 0.42573000  |
| H | -4.16731700 | 2.49521100  | -0.37700100 |
| C | -5.51627700 | -2.68065000 | -0.57873800 |
| H | -4.74771500 | -3.44437200 | -0.39953800 |
| C | -6.84562600 | -3.13868400 | 0.00737000  |
| H | -7.19169300 | -4.05665200 | -0.48737800 |
| H | -6.75175700 | -3.33188700 | 1.08464200  |
| H | -7.62262600 | -2.36994400 | -0.13957500 |
| C | -5.60404400 | -2.43497200 | -2.08385600 |
| H | -4.62478300 | -2.11250200 | -2.46145900 |
| H | -5.90114700 | -3.35063200 | -2.61601900 |
| H | -6.35120200 | -1.65477400 | -2.30399100 |
| C | 0.12236100  | 2.26530000  | -0.14513500 |
| H | 0.84560200  | 1.51727500  | 0.19837700  |
| C | -0.83320000 | 1.83742500  | -1.18331200 |
| H | -1.23293500 | 2.59835800  | -1.86282600 |
| H | -0.79531300 | 0.80658600  | -1.55096300 |
| O | -1.22682500 | 1.97901000  | 0.16917300  |
| C | 0.54362000  | 3.69004300  | -0.02418900 |
| C | 1.90171300  | 4.01777100  | -0.06393600 |
| C | -0.40592400 | 4.70716000  | 0.11023300  |
| C | 2.30516800  | 5.34912000  | 0.01584700  |
| H | 2.64235900  | 3.22035600  | -0.15987400 |

|   |             |             |             |
|---|-------------|-------------|-------------|
| C | -0.00070100 | 6.03733300  | 0.19376700  |
| H | -1.46357300 | 4.44111900  | 0.16097100  |
| C | 1.35496700  | 6.36217900  | 0.14386100  |
| H | 3.36733300  | 5.59699100  | -0.01812100 |
| H | -0.74733900 | 6.82557100  | 0.30354500  |
| H | 1.67153000  | 7.40419300  | 0.21025800  |
| C | 3.53090600  | -1.38252300 | 0.20569600  |
| N | 2.64222700  | -0.75660900 | -0.48359000 |
| N | 4.85326200  | -1.01827200 | 0.10648600  |
| H | 5.42735300  | -1.23587500 | 0.91072600  |
| N | 3.27941000  | -2.43502300 | 1.06849800  |
| H | 2.30895000  | -2.73650500 | 1.02782200  |
| C | 4.22155300  | -3.53352000 | 1.27281400  |
| H | 5.15854200  | -3.11676400 | 1.67846700  |
| C | 3.64091800  | -4.46192200 | 2.33179200  |
| H | 4.33842200  | -5.28004800 | 2.55585100  |
| H | 3.42822400  | -3.91102000 | 3.25790700  |
| H | 2.70091800  | -4.90947800 | 1.97139600  |
| C | 4.53804700  | -4.27614400 | -0.02466200 |
| H | 4.95155700  | -3.58296300 | -0.77033000 |
| H | 5.26744600  | -5.08079900 | 0.14855900  |
| H | 3.61898600  | -4.72251300 | -0.43476900 |
| C | 5.25239300  | 0.14196500  | -0.68223100 |
| H | 4.49514900  | 0.93096100  | -0.53881500 |
| C | 6.60192200  | 0.63453800  | -0.17660400 |
| H | 6.92865100  | 1.51126100  | -0.75162500 |
| H | 6.55175600  | 0.92203300  | 0.88441100  |
| H | 7.36654400  | -0.14999900 | -0.29210000 |
| C | 5.29819000  | -0.20534800 | -2.16686000 |
| H | 4.31734200  | -0.57396500 | -2.49229900 |
| H | 5.55422500  | 0.68227000  | -2.76385400 |
| H | 6.05527800  | -0.98329100 | -2.35061000 |

#### G4-IM1

|   |             |             |             |
|---|-------------|-------------|-------------|
| C | -3.52450600 | -1.93020800 | -0.01872600 |
| N | -2.61149100 | -2.68131000 | 0.48781600  |
| N | -4.84409000 | -2.09209200 | 0.39708000  |
| H | -5.37051600 | -1.22708100 | 0.42049400  |
| N | -3.32614900 | -1.00158000 | -1.00683700 |
| H | -2.35565400 | -0.76755900 | -1.21835900 |
| C | -4.32870700 | -0.09378600 | -1.53219700 |
| H | -5.29927900 | -0.61064500 | -1.46647700 |
| C | -4.38880100 | 1.21105200  | -0.73326100 |
| H | -5.17383000 | 1.88162100  | -1.11486300 |



|   |             |             |             |
|---|-------------|-------------|-------------|
| H | -4.58214000 | 1.01604500  | 0.33279400  |
| H | -3.42381600 | 1.73525000  | -0.80564300 |
| C | -4.05405600 | 0.17001600  | -3.01058000 |
| H | -4.06660800 | -0.77240200 | -3.57519400 |
| H | -4.81189500 | 0.84873800  | -3.42887900 |
| H | -3.06330600 | 0.63147900  | -3.12384400 |
| C | -5.12635200 | -2.98826800 | 1.51279300  |
| H | -4.32151400 | -2.88882000 | 2.26114800  |
| C | -6.45641600 | -2.58296200 | 2.13462900  |
| H | -6.70606200 | -3.24393100 | 2.97606300  |
| H | -6.42148900 | -1.55009500 | 2.51413000  |
| H | -7.26608000 | -2.65487600 | 1.39066500  |
| C | -5.15035600 | -4.43801300 | 1.03956900  |
| H | -4.18071400 | -4.68965600 | 0.59270900  |
| H | -5.33837900 | -5.11787600 | 1.88446300  |
| H | -5.94285800 | -4.57671100 | 0.28762100  |
| C | -1.27808300 | -2.48219700 | 0.10124100  |
| C | -0.60625300 | -3.41340200 | -0.70521800 |
| C | -0.55782800 | -1.35786700 | 0.53240200  |
| C | 0.71878800  | -3.21592700 | -1.08015100 |
| H | -1.15269800 | -4.29716400 | -1.04129500 |
| C | 0.76530400  | -1.15885400 | 0.15353400  |
| H | -1.03019900 | -0.61889400 | 1.18682800  |
| C | 1.44099000  | -2.08525700 | -0.66105600 |
| H | 1.22829000  | -3.93520600 | -1.72437800 |
| H | 1.25348200  | -0.24255400 | 0.49929100  |
| C | -0.45896200 | 1.73594600  | -1.10352500 |
| H | -0.25072000 | 1.41502400  | -0.07458400 |
| C | 0.28971000  | 1.08749100  | -2.19540900 |
| H | 0.45650200  | 1.66197300  | -3.11449700 |
| H | 1.01849600  | 0.30321300  | -1.96532700 |
| O | -1.06047800 | 0.76054500  | -1.94344400 |
| C | -0.97710200 | 3.12747500  | -1.24580500 |
| C | -0.78200700 | 4.04360600  | -0.20719500 |
| C | -1.66329900 | 3.52305200  | -2.39979200 |
| C | -1.26102400 | 5.34746700  | -0.33512100 |
| H | -0.26022600 | 3.71827200  | 0.69953800  |
| C | -2.14250400 | 4.82539400  | -2.52041500 |
| H | -1.83140300 | 2.79136200  | -3.19367200 |
| C | -1.94018300 | 5.74227400  | -1.48774000 |
| H | -1.10773600 | 6.05767700  | 0.47943700  |
| H | -2.68260700 | 5.12462700  | -3.42103400 |
| H | -2.31878900 | 6.76222400  | -1.57997000 |
| C | 3.70765900  | -1.43520100 | -0.43244500 |

|   |            |             |             |
|---|------------|-------------|-------------|
| N | 2.74165000 | -1.91209600 | -1.14547000 |
| N | 4.92268700 | -1.20100500 | -1.05296100 |
| H | 5.73027900 | -1.15035500 | -0.44470200 |
| N | 3.68279400 | -1.16425300 | 0.91046300  |
| H | 2.76399200 | -1.20025800 | 1.34028500  |
| C | 4.67226600 | -0.37647100 | 1.63880500  |
| H | 5.66481100 | -0.84169900 | 1.47951200  |
| C | 4.71929100 | 1.08324600  | 1.18405600  |
| H | 5.51154100 | 1.62536800  | 1.72324200  |
| H | 4.91870400 | 1.14994400  | 0.10535800  |
| H | 3.75256100 | 1.56437800  | 1.40314600  |
| C | 4.35382000 | -0.48087500 | 3.12581600  |
| H | 4.33684700 | -1.53258100 | 3.44670200  |
| H | 5.10839100 | 0.05919000  | 3.71457900  |
| H | 3.37138300 | -0.02150600 | 3.32439500  |
| C | 5.17466300 | -1.67004000 | -2.40277000 |
| H | 4.27000800 | -1.42839200 | -2.97753700 |
| C | 6.36449700 | -0.90845900 | -2.97385400 |
| H | 6.55849000 | -1.21058000 | -4.01296400 |
| H | 6.18285200 | 0.17484300  | -2.94810400 |
| H | 7.27734300 | -1.11870600 | -2.39109300 |
| C | 5.38008700 | -3.18350500 | -2.46140100 |
| H | 4.49758400 | -3.68433600 | -2.04241700 |
| H | 5.52032700 | -3.52412300 | -3.49868900 |
| H | 6.27064700 | -3.47463400 | -1.88010100 |
| I | 0.95185200 | 1.76541600  | 2.65851000  |

#### G4-TS1

|   |             |             |             |
|---|-------------|-------------|-------------|
| C | -1.82084500 | 2.19041100  | 0.10098400  |
| N | -1.00275300 | 1.80870800  | -0.82914300 |
| C | 0.21016500  | 1.18625500  | -0.53980900 |
| C | 1.11872600  | 1.66674500  | 0.42354300  |
| C | 0.60212000  | 0.06139300  | -1.28797500 |
| C | 2.35428800  | 1.05641500  | 0.61363200  |
| H | 0.83557500  | 2.52485100  | 1.03496400  |
| C | 1.83042000  | -0.56029300 | -1.08419600 |
| H | -0.09426800 | -0.34246900 | -2.02635000 |
| C | 2.73894700  | -0.06261900 | -0.14213000 |
| H | 3.04174300  | 1.43458700  | 1.37499700  |
| H | 2.09576300  | -1.45044000 | -1.65649300 |
| N | -2.87560700 | 3.01839300  | -0.24622400 |
| H | -3.70890900 | 2.86673900  | 0.31019800  |
| N | -1.73570100 | 1.85573900  | 1.41878700  |
| H | -1.33438900 | 0.92473900  | 1.62486500  |

|   |             |             |             |
|---|-------------|-------------|-------------|
| C | -2.66388100 | 2.29783200  | 2.44841100  |
| H | -2.89923800 | 3.35591600  | 2.24157000  |
| C | -3.95232600 | 1.46870600  | 2.48988700  |
| H | -4.65826800 | 1.87798500  | 3.22992900  |
| H | -4.45911500 | 1.41996700  | 1.51151100  |
| H | -3.67775800 | 0.43873600  | 2.75785500  |
| C | -1.94229600 | 2.20163400  | 3.79066200  |
| H | -1.04239200 | 2.83321700  | 3.79500400  |
| H | -2.60255700 | 2.51207600  | 4.61411300  |
| H | -1.64327500 | 1.15306700  | 3.94487200  |
| C | -3.13743900 | 3.32826100  | -1.64425900 |
| H | -3.01262600 | 2.40782300  | -2.24357700 |
| C | -4.57453400 | 3.82147300  | -1.76179300 |
| H | -4.82269100 | 4.04192800  | -2.80950100 |
| H | -5.28421000 | 3.06586700  | -1.39095100 |
| H | -4.71100600 | 4.74335500  | -1.17410300 |
| C | -2.15073600 | 4.36692500  | -2.16891100 |
| H | -1.12827200 | 3.98364000  | -2.06790600 |
| H | -2.34704100 | 4.58274300  | -3.23029500 |
| H | -2.24678800 | 5.30059600  | -1.59292500 |
| C | -1.94031900 | -1.52675800 | 0.59466800  |
| H | -1.18505700 | -0.96161500 | 0.05150400  |
| C | -1.50588500 | -1.99688100 | 1.91668100  |
| H | -2.15395800 | -2.77771000 | 2.36649600  |
| H | -0.46240600 | -2.36726600 | 1.91094800  |
| O | -1.70470200 | -0.71515300 | 2.35452500  |
| C | -3.34557500 | -1.16816700 | 0.29886400  |
| C | -3.61984700 | -0.33772900 | -0.79581200 |
| C | -4.41145200 | -1.61436200 | 1.08931200  |
| C | -4.92724700 | 0.04293100  | -1.09016200 |
| H | -2.78817500 | 0.00827100  | -1.41431900 |
| C | -5.71702200 | -1.22903900 | 0.79967700  |
| H | -4.20483000 | -2.25106100 | 1.95082300  |
| C | -5.98299800 | -0.39717900 | -0.29015700 |
| H | -5.12190800 | 0.67974300  | -1.95655100 |
| H | -6.53641600 | -1.57816900 | 1.43131700  |
| H | -7.00886600 | -0.10039700 | -0.51799300 |
| I | -1.59494200 | -3.53594700 | -1.10440100 |
| C | 5.04955800  | -0.06582600 | -0.32278000 |
| N | 3.99194100  | -0.67785100 | 0.05279100  |
| N | 6.30429000  | -0.56210700 | -0.00186400 |
| H | 6.98412000  | -0.42324000 | -0.74174800 |
| N | 5.08771400  | 1.09704700  | -1.08787200 |
| H | 4.14547000  | 1.44049300  | -1.26471100 |

|   |            |             |             |
|---|------------|-------------|-------------|
| C | 6.02643800 | 2.17015500  | -0.76790500 |
| H | 7.04710200 | 1.76225600  | -0.84461400 |
| C | 5.87445200 | 3.26631300  | -1.81494700 |
| H | 6.59862100 | 4.07497800  | -1.64359600 |
| H | 6.02298400 | 2.85968000  | -2.82459800 |
| H | 4.86316900 | 3.70061400  | -1.76456100 |
| C | 5.83240100 | 2.70879400  | 0.64891200  |
| H | 5.93330200 | 1.89465200  | 1.38178400  |
| H | 6.57700500 | 3.48430900  | 0.88413400  |
| H | 4.82784500 | 3.14772700  | 0.75149600  |
| C | 6.41067400 | -1.83442400 | 0.70496000  |
| H | 5.66242500 | -2.53345400 | 0.29362900  |
| C | 7.81002200 | -2.39334000 | 0.48428100  |
| H | 7.92889700 | -3.35129100 | 1.00854900  |
| H | 8.00765700 | -2.56572500 | -0.58497600 |
| H | 8.56757600 | -1.69328900 | 0.87145300  |
| C | 6.11181200 | -1.64477300 | 2.18831400  |
| H | 5.10227400 | -1.23377900 | 2.31440100  |
| H | 6.16387500 | -2.60744900 | 2.71814300  |
| H | 6.84362300 | -0.95342000 | 2.63521600  |

#### G4-IM2

|   |             |             |             |
|---|-------------|-------------|-------------|
| C | -1.93875800 | 1.99680000  | -0.18161800 |
| N | -1.14256800 | 1.47272200  | -1.11369500 |
| C | 0.11170700  | 0.97713400  | -0.84638000 |
| C | 0.89731900  | 1.19067600  | 0.31659700  |
| C | 0.70911200  | 0.16946200  | -1.84881900 |
| C | 2.18368400  | 0.66620500  | 0.42726000  |
| H | 0.47419200  | 1.76343000  | 1.13804700  |
| C | 1.98581300  | -0.36101800 | -1.72498800 |
| H | 0.11397400  | -0.02782700 | -2.74314700 |
| C | 2.76490000  | -0.10706900 | -0.58793800 |
| H | 2.75336700  | 0.83583700  | 1.34592300  |
| H | 2.40677400  | -0.98539600 | -2.51591100 |
| N | -3.02692200 | 2.72530100  | -0.69580100 |
| H | -3.85711700 | 2.66736000  | -0.11887300 |
| N | -1.81210500 | 1.87228400  | 1.12609700  |
| H | -1.42216500 | 0.46051800  | 1.90022100  |
| C | -2.70740800 | 2.56308100  | 2.02931200  |
| H | -3.03481600 | 3.52860600  | 1.59274300  |
| C | -3.95220700 | 1.72696400  | 2.36203800  |
| H | -4.62563700 | 2.25842000  | 3.05475000  |
| H | -4.52345900 | 1.46141000  | 1.45754200  |
| H | -3.62702900 | 0.78265600  | 2.82401300  |

|   |             |             |             |
|---|-------------|-------------|-------------|
| C | -1.93847900 | 2.87165100  | 3.31580500  |
| H | -1.06779600 | 3.50524900  | 3.09198500  |
| H | -2.57262800 | 3.38446300  | 4.05684400  |
| H | -1.57241700 | 1.92889500  | 3.75175100  |
| C | -3.29320400 | 2.81339300  | -2.11927600 |
| H | -3.15342400 | 1.82233300  | -2.58920300 |
| C | -4.73803600 | 3.26283200  | -2.30904800 |
| H | -4.98813000 | 3.33583300  | -3.37721600 |
| H | -5.43816100 | 2.55532700  | -1.83819800 |
| H | -4.89134900 | 4.25280300  | -1.84964200 |
| C | -2.32703200 | 3.77980300  | -2.79923800 |
| H | -1.30106400 | 3.42409700  | -2.64527200 |
| H | -2.53039300 | 3.83939400  | -3.88035800 |
| H | -2.43311300 | 4.78452500  | -2.35995200 |
| C | -1.84186900 | -1.46022100 | 0.34896200  |
| H | -1.40091800 | -0.73114700 | -0.33794200 |
| C | -1.08896600 | -1.47651800 | 1.68330800  |
| H | -1.34016500 | -2.39804900 | 2.23840200  |
| H | -0.00926200 | -1.53096600 | 1.43928500  |
| O | -1.41723100 | -0.38315500 | 2.46671400  |
| C | -3.32231800 | -1.24668700 | 0.40315400  |
| C | -3.93909500 | -0.54564700 | -0.64096500 |
| C | -4.10629600 | -1.71961700 | 1.46001600  |
| C | -5.31736300 | -0.34090900 | -0.63877300 |
| H | -3.30828500 | -0.15098000 | -1.44305100 |
| C | -5.48223200 | -1.50279900 | 1.46959700  |
| H | -3.62645600 | -2.23941200 | 2.29126100  |
| C | -6.09360900 | -0.81870600 | 0.41780700  |
| H | -5.78767200 | 0.19529700  | -1.46592200 |
| H | -6.08261500 | -1.86433100 | 2.30674400  |
| H | -7.17267200 | -0.65264800 | 0.42574100  |
| I | -1.40706500 | -3.35653100 | -0.69072400 |
| C | 5.06598600  | 0.15167400  | -0.39727200 |
| N | 4.06832700  | -0.64290600 | -0.47092900 |
| N | 6.34002200  | -0.33572800 | -0.12394200 |
| H | 7.06076500  | 0.15595200  | -0.64198500 |
| N | 5.03374500  | 1.52810900  | -0.61180700 |
| H | 4.07516900  | 1.83872000  | -0.76308900 |
| C | 5.78958000  | 2.43894500  | 0.24414600  |
| H | 6.85421600  | 2.16216300  | 0.17825900  |
| C | 5.63296400  | 3.85187500  | -0.30428500 |
| H | 6.21832100  | 4.56958400  | 0.28763200  |
| H | 5.96041200  | 3.89862300  | -1.35195500 |
| H | 4.57591800  | 4.15940100  | -0.26137600 |

|   |            |             |             |
|---|------------|-------------|-------------|
| C | 5.36541300 | 2.35108200  | 1.70941400  |
| H | 5.46263800 | 1.31671100  | 2.07082100  |
| H | 5.98749600 | 3.00205000  | 2.34239000  |
| H | 4.31459100 | 2.66042100  | 1.81883400  |
| C | 6.54328400 | -1.77573700 | -0.01899800 |
| H | 5.95494300 | -2.27955800 | -0.80577400 |
| C | 8.02447400 | -2.06882500 | -0.22033800 |
| H | 8.21876500 | -3.14727300 | -0.14067600 |
| H | 8.36835800 | -1.73424600 | -1.21164400 |
| H | 8.62314400 | -1.55385300 | 0.54781500  |
| C | 6.05284300 | -2.28657600 | 1.33185700  |
| H | 4.98664900 | -2.05618800 | 1.44892600  |
| H | 6.18527700 | -3.37660400 | 1.40334000  |
| H | 6.61932400 | -1.80618100 | 2.14508400  |

**G4-TS2**

|   |             |             |             |
|---|-------------|-------------|-------------|
| C | -3.07087800 | -1.91721800 | 0.25269900  |
| N | -2.14383600 | -2.47772900 | -0.47403500 |
| C | -0.83271900 | -2.03053300 | -0.52300100 |
| C | -0.12073100 | -1.46553600 | 0.55757600  |
| C | -0.11077400 | -2.23698100 | -1.71492500 |
| C | 1.22789700  | -1.13787200 | 0.44085300  |
| H | -0.64945000 | -1.26596300 | 1.48925400  |
| C | 1.23401300  | -1.90316600 | -1.83148200 |
| H | -0.65249800 | -2.66262000 | -2.56066000 |
| C | 1.93798100  | -1.35926800 | -0.75025500 |
| H | 1.75318400  | -0.67518500 | 1.28156100  |
| H | 1.76619900  | -2.06332700 | -2.77105700 |
| N | -4.27089700 | -2.61119100 | 0.37763800  |
| H | -5.06519100 | -1.98634700 | 0.45963000  |
| N | -2.97600400 | -0.70002000 | 0.84091200  |
| C | -4.06747500 | -0.12583200 | 1.60398500  |
| H | -5.02853100 | -0.18490800 | 1.04463000  |
| C | -4.24801000 | -0.82988200 | 2.95167000  |
| H | -5.08441400 | -0.38974500 | 3.51758400  |
| H | -4.43540200 | -1.90342700 | 2.81540300  |
| H | -3.32627100 | -0.71437200 | 3.54239600  |
| C | -3.78257100 | 1.35957100  | 1.80250400  |
| H | -3.64860700 | 1.84932000  | 0.82927900  |
| H | -4.59802900 | 1.84550900  | 2.35929000  |
| H | -2.84612000 | 1.48720300  | 2.36983300  |
| C | -4.52730200 | -3.77071400 | -0.46525900 |
| H | -4.06886600 | -3.59638900 | -1.45353600 |
| C | -3.89073400 | -5.02247000 | 0.12998600  |

|   |             |             |             |
|---|-------------|-------------|-------------|
| H | -4.06035500 | -5.89428600 | -0.52111600 |
| H | -2.81045100 | -4.86128800 | 0.23266900  |
| H | -4.32138700 | -5.22977200 | 1.12244200  |
| C | -6.03410800 | -3.92685100 | -0.62703500 |
| H | -6.46795300 | -3.03581700 | -1.10611700 |
| H | -6.27018900 | -4.80112100 | -1.25032100 |
| H | -6.51460700 | -4.06616100 | 0.35515600  |
| H | -2.48637500 | 0.05572400  | 0.09923100  |
| C | -0.41761100 | 2.10684100  | -0.01025500 |
| H | -0.28877100 | 1.43425400  | 0.84894000  |
| C | -0.96781700 | 1.31792600  | -1.20475400 |
| H | -0.92275900 | 1.98546800  | -2.09664000 |
| H | -0.25835800 | 0.49171400  | -1.41741000 |
| O | -2.24046500 | 0.91877500  | -0.91739000 |
| C | -1.19941700 | 3.32885200  | 0.38460500  |
| C | -0.94803900 | 3.97528800  | 1.60171400  |
| C | -2.22127300 | 3.82212600  | -0.43558800 |
| C | -1.68939500 | 5.08766300  | 1.99073900  |
| H | -0.14941900 | 3.59739100  | 2.24554100  |
| C | -2.96355900 | 4.93656100  | -0.04731400 |
| H | -2.47549100 | 3.27929200  | -1.34521100 |
| C | -2.70173500 | 5.57555200  | 1.16337400  |
| H | -1.47887100 | 5.57492200  | 2.94492900  |
| H | -3.76594400 | 5.29839400  | -0.69333100 |
| H | -3.28936600 | 6.44470400  | 1.46595100  |
| I | 1.68135800  | 2.68012600  | -0.44051300 |
| C | -3.33238300 | -0.48493000 | -2.49978700 |
| O | -2.44588200 | -0.55333100 | -3.24508700 |
| O | -4.34088100 | -0.52080400 | -1.91958800 |
| N | 3.30499700  | -1.03660400 | -0.87064200 |
| N | 3.91579200  | -2.85567300 | 0.53701200  |
| H | 2.92255500  | -3.08041500 | 0.51403900  |
| N | 5.49519300  | -1.29665000 | -0.16307300 |
| H | 6.13941400  | -2.08015600 | -0.16427000 |
| C | 4.49621600  | -3.03280800 | 1.86651200  |
| H | 5.59246700  | -2.99082400 | 1.76515600  |
| C | 4.11975500  | -4.41922600 | 2.37322800  |
| H | 4.56901900  | -4.61142800 | 3.35780200  |
| H | 3.02598800  | -4.50048000 | 2.47852800  |
| H | 4.45446400  | -5.19271200 | 1.66846000  |
| C | 4.06477400  | -1.93653200 | 2.83926900  |
| H | 4.32430800  | -0.94667800 | 2.43506400  |
| H | 2.97504000  | -1.97357800 | 2.99174000  |
| H | 4.55726200  | -2.05542700 | 3.81634800  |

|   |            |             |             |
|---|------------|-------------|-------------|
| C | 5.91268100 | -0.14978400 | -0.96226100 |
| H | 5.40527900 | -0.19478200 | -1.94150100 |
| C | 5.49851800 | 1.14839400  | -0.27885200 |
| H | 5.76870000 | 2.01594600  | -0.89978900 |
| H | 4.41085000 | 1.15728300  | -0.12790400 |
| H | 6.00149800 | 1.24062800  | 0.69687300  |
| C | 7.42057400 | -0.22296700 | -1.16331900 |
| H | 7.93787800 | -0.20495200 | -0.19076700 |
| H | 7.71091500 | -1.14202900 | -1.69623200 |
| H | 7.77052500 | 0.63567000  | -1.75279300 |
| C | 4.16533100 | -1.69420300 | -0.19296500 |

**G4-IM3**

|   |             |             |             |
|---|-------------|-------------|-------------|
| C | -0.70361400 | -1.77589400 | -0.55276200 |
| C | 0.68516100  | -1.84994800 | -0.61710500 |
| C | 1.41242000  | -1.14522400 | -1.59246500 |
| C | 0.66284200  | -0.40365000 | -2.52764300 |
| C | -0.72190800 | -0.32702000 | -2.46022200 |
| C | -1.44789700 | -1.00112300 | -1.46149700 |
| H | -1.18071500 | -2.25201800 | 0.30271300  |
| H | 1.19600800  | -2.43163900 | 0.15219500  |
| H | 1.21149900  | 0.14153800  | -3.29855800 |
| H | -1.28024700 | 0.30000100  | -3.15743600 |
| N | 2.80163800  | -1.14348700 | -1.71944400 |
| N | -2.81925300 | -0.74370900 | -1.37666200 |
| N | 3.30174400  | -0.95815100 | 0.59871400  |
| H | 2.33762800  | -0.70237900 | 0.84436000  |
| N | 4.96132600  | -1.39408600 | -0.96286200 |
| H | 5.58106400  | -0.91617500 | -0.31681000 |
| N | -3.51704500 | -2.86280600 | -0.50721500 |
| H | -2.58612300 | -3.18803700 | -0.74382700 |
| N | -4.94283400 | -1.04136400 | -0.54766000 |
| H | -5.68572300 | -1.73067300 | -0.58008300 |
| C | -3.99926300 | -3.39963600 | 0.77220200  |
| H | -5.10342900 | -3.38189900 | 0.74702100  |
| C | -3.52496300 | -2.59933600 | 1.98418000  |
| H | -3.99081000 | -2.99755100 | 2.89966200  |
| H | -2.42956100 | -2.63598100 | 2.10925100  |
| H | -3.80756300 | -1.54216400 | 1.88526400  |
| C | -3.55953100 | -4.85566900 | 0.85810400  |
| H | -3.90561200 | -5.42534700 | -0.01654000 |
| H | -2.46006100 | -4.91194900 | 0.90409600  |
| H | -3.95435000 | -5.32418700 | 1.77012100  |
| C | -5.31000600 | 0.32682200  | -0.86598300 |



|   |             |             |             |
|---|-------------|-------------|-------------|
| H | -4.43691300 | 0.93905100  | -0.59651400 |
| C | -5.57899700 | 0.52395900  | -2.35718100 |
| H | -5.80944700 | 1.57718900  | -2.57889500 |
| H | -4.68636400 | 0.23217700  | -2.92566800 |
| H | -6.43528600 | -0.09153500 | -2.68090100 |
| C | -6.50372200 | 0.73046200  | -0.00851200 |
| H | -7.38475000 | 0.11094500  | -0.24889300 |
| H | -6.27434700 | 0.60481700  | 1.05864600  |
| H | -6.77508300 | 1.78005400  | -0.19054400 |
| C | 4.04921800  | -1.41868200 | 1.76381000  |
| H | 5.05931700  | -1.70253900 | 1.43140900  |
| C | 4.15665300  | -0.28401100 | 2.78085600  |
| H | 4.66524400  | 0.58525800  | 2.33721400  |
| H | 3.14290300  | 0.02202900  | 3.07659800  |
| H | 4.71525800  | -0.61035200 | 3.67162700  |
| C | 3.38014800  | -2.66093100 | 2.35631900  |
| H | 2.32949400  | -2.44250100 | 2.60628700  |
| H | 3.39770600  | -3.48259200 | 1.62391000  |
| H | 3.90803500  | -2.99421100 | 3.26369300  |
| C | 5.44898700  | -1.43811600 | -2.33032700 |
| H | 4.71422000  | -2.03255100 | -2.88984600 |
| C | 6.80259600  | -2.13912100 | -2.34797100 |
| H | 7.54351200  | -1.56766500 | -1.76378200 |
| H | 6.72306600  | -3.14317400 | -1.90905200 |
| H | 7.18623900  | -2.22778800 | -3.37472200 |
| C | 5.51459300  | -0.04952700 | -2.96603700 |
| H | 4.51803700  | 0.41003400  | -2.92901600 |
| H | 6.22946300  | 0.58985500  | -2.42100600 |
| H | 5.84005100  | -0.10594700 | -4.01615300 |
| C | -3.68010500 | -1.52329800 | -0.83112400 |
| C | 3.61011800  | -1.17102600 | -0.70728100 |
| C | -0.00331600 | -0.99006400 | 2.26800200  |
| O | -0.17472800 | -2.19223600 | 2.45493800  |
| O | 1.04931200  | -0.32387400 | 2.18132100  |
| I | -1.62270000 | 2.89119800  | -0.50629900 |
| C | -1.03685300 | 1.13505800  | 1.99515600  |
| C | -0.30389100 | 1.57570100  | 0.70941400  |
| O | -1.18825700 | -0.25313000 | 2.09254600  |
| H | -0.47085900 | 1.51667600  | 2.85976400  |
| H | -2.05334900 | 1.54563500  | 2.02427700  |
| C | 1.00547700  | 2.28805700  | 0.87810200  |
| C | 1.19481400  | 3.26101500  | 1.86685600  |
| C | 2.07426400  | 1.97632700  | 0.03179700  |
| C | 2.42910700  | 3.88604000  | 2.02311400  |

|   |             |            |             |
|---|-------------|------------|-------------|
| H | 0.36296900  | 3.53751400 | 2.51856700  |
| C | 3.31093800  | 2.59821700 | 0.18840700  |
| H | 1.93798700  | 1.22389400 | -0.74807100 |
| C | 3.49568300  | 3.55331100 | 1.18685700  |
| H | 2.56004100  | 4.63809400 | 2.80378000  |
| H | 4.13590900  | 2.32118700 | -0.47162400 |
| H | 4.46571400  | 4.03816900 | 1.31401900  |
| H | -0.19104800 | 0.71620700 | 0.04036800  |

**G4-TS3**

|   |             |             |             |
|---|-------------|-------------|-------------|
| C | -0.44614500 | -2.01033700 | -0.42798100 |
| C | 0.94212500  | -2.05627400 | -0.50416400 |
| C | 1.64147900  | -1.37319300 | -1.51142800 |
| C | 0.87624100  | -0.68697400 | -2.47283600 |
| C | -0.51023400 | -0.63494600 | -2.39444200 |
| C | -1.20981900 | -1.27737000 | -1.35559300 |
| H | -0.92159300 | -2.46680900 | 0.43978800  |
| H | 1.49321800  | -2.58418300 | 0.27796400  |
| H | 1.40540300  | -0.15914400 | -3.26880800 |
| H | -1.08845000 | -0.03109600 | -3.09538900 |
| N | 3.03529700  | -1.38525900 | -1.61047900 |
| N | -2.57209200 | -1.00720300 | -1.23227100 |
| N | 3.37010500  | -0.43189600 | 0.54099700  |
| H | 2.35971900  | -0.30423300 | 0.64127200  |
| N | 5.14322300  | -1.30487000 | -0.68567400 |
| H | 5.71344000  | -0.63169400 | -0.18532300 |
| N | -3.27862800 | -3.11798100 | -0.36673200 |
| H | -2.35612000 | -3.45172800 | -0.62451400 |
| N | -4.66903000 | -1.25914300 | -0.33412500 |
| H | -5.42853300 | -1.93131600 | -0.33864600 |
| C | -3.77569100 | -3.70200700 | 0.88217000  |
| H | -4.87829100 | -3.64386000 | 0.86594600  |
| C | -3.27398900 | -2.97995500 | 2.13095900  |
| H | -3.72996700 | -3.42052000 | 3.03144500  |
| H | -2.17803800 | -3.03611900 | 2.23582900  |
| H | -3.53259400 | -1.91353900 | 2.09279500  |
| C | -3.39222300 | -5.17658700 | 0.88894000  |
| H | -3.76962700 | -5.68516900 | -0.00961000 |
| H | -2.29532900 | -5.27872000 | 0.91439400  |
| H | -3.79467000 | -5.67747700 | 1.78013500  |
| C | -5.02344900 | 0.10780200  | -0.69140900 |
| H | -4.13188900 | 0.71998200  | -0.49057800 |
| C | -5.34393400 | 0.25534300  | -2.17671200 |
| H | -5.55656300 | 1.30632600  | -2.42189300 |

|   |             |             |             |
|---|-------------|-------------|-------------|
| H | -4.47646700 | -0.06699500 | -2.76730500 |
| H | -6.22305800 | -0.35302800 | -2.45026600 |
| C | -6.17179500 | 0.56901000  | 0.19650700  |
| H | -7.07726200 | -0.03548800 | 0.01471700  |
| H | -5.90295900 | 0.47765300  | 1.25819500  |
| H | -6.42110900 | 1.61833200  | -0.01439300 |
| C | 4.01698800  | -0.58441100 | 1.84343100  |
| H | 5.10403800  | -0.65311300 | 1.68203200  |
| C | 3.74090100  | 0.65487700  | 2.69042600  |
| H | 4.11800200  | 1.55937400  | 2.19168200  |
| H | 2.65669600  | 0.77022100  | 2.83289700  |
| H | 4.22360500  | 0.55980200  | 3.67487700  |
| C | 3.55424400  | -1.86873300 | 2.53161100  |
| H | 2.46259400  | -1.85016400 | 2.68416100  |
| H | 3.80768600  | -2.74017300 | 1.90763800  |
| H | 4.04650300  | -1.99033800 | 3.50931000  |
| C | 5.72813000  | -1.78741800 | -1.92472900 |
| H | 5.03681400  | -2.55464300 | -2.29928000 |
| C | 7.08164800  | -2.41808300 | -1.61833900 |
| H | 7.78063500  | -1.66417900 | -1.21864900 |
| H | 6.97576100  | -3.21576500 | -0.87029500 |
| H | 7.53270500  | -2.83961900 | -2.52827700 |
| C | 5.83295800  | -0.68999400 | -2.98328000 |
| H | 4.83473600  | -0.27474200 | -3.17355000 |
| H | 6.50073300  | 0.11646300  | -2.63721500 |
| H | 6.23714600  | -1.08629100 | -3.92742000 |
| C | -3.43171300 | -1.77096600 | -0.66305600 |
| C | 3.77854900  | -1.05862300 | -0.60703700 |
| C | -0.12696000 | -0.81312000 | 2.21790700  |
| O | 0.03617600  | -1.90760100 | 2.72414700  |
| O | 0.74002600  | 0.00674000  | 1.77722400  |
| I | -1.77278100 | 2.89365800  | -1.00618900 |
| C | -1.53161300 | 0.93630300  | 1.51864700  |
| C | -0.34923300 | 1.31338900  | 0.63288700  |
| O | -1.41568000 | -0.36828400 | 2.04677200  |
| H | -1.64163900 | 1.66965400  | 2.33367300  |
| H | -2.44665700 | 0.93647800  | 0.92243500  |
| C | 0.67234300  | 2.35367900  | 0.90006600  |
| C | 0.64150800  | 3.18892900  | 2.02075500  |
| C | 1.75621300  | 2.44300500  | 0.01730900  |
| C | 1.66958400  | 4.10086000  | 2.24736700  |
| H | -0.19063400 | 3.13143400  | 2.72322100  |
| C | 2.78151100  | 3.35405500  | 0.24369600  |
| H | 1.78088100  | 1.78535500  | -0.85571300 |

|   |             |            |             |
|---|-------------|------------|-------------|
| C | 2.74178800  | 4.19112500 | 1.35982500  |
| H | 1.63186500  | 4.74830200 | 3.12557300  |
| H | 3.61891200  | 3.40712400 | -0.45438000 |
| H | 3.54423900  | 4.90925600 | 1.53887300  |
| H | -0.16927400 | 0.68183800 | -0.23544500 |

**G4-IM4**

|   |             |             |             |
|---|-------------|-------------|-------------|
| C | 0.46901100  | -2.29477500 | -0.24584100 |
| C | 1.81167200  | -2.00415200 | -0.47637200 |
| C | 2.20397200  | -1.10145700 | -1.47316000 |
| C | 1.19342700  | -0.50784300 | -2.24734900 |
| C | -0.14569600 | -0.79441900 | -2.02106800 |
| C | -0.54853100 | -1.70331900 | -1.02031100 |
| H | 0.22636200  | -2.93335700 | 0.60272600  |
| H | 2.57839900  | -2.46515100 | 0.14996200  |
| H | 1.48207600  | 0.20697800  | -3.01991500 |
| H | -0.93640800 | -0.28551000 | -2.57881800 |
| N | 3.55368100  | -0.81431500 | -1.71560700 |
| N | -1.92372800 | -1.82444700 | -0.83490800 |
| N | 3.81790500  | 0.26598400  | 0.38537800  |
| H | 2.80182500  | 0.25057500  | 0.47685600  |
| N | 5.65436000  | -0.25412800 | -0.93797700 |
| H | 6.08927000  | 0.54886600  | -0.49506300 |
| N | -2.07503900 | -3.97613200 | 0.21443600  |
| H | -1.12779800 | -4.12633500 | -0.11406000 |
| N | -3.88076800 | -2.52750100 | 0.13068300  |
| H | -4.43302900 | -3.37673100 | 0.19512200  |
| C | -2.27932100 | -4.42176900 | 1.59651600  |
| H | -3.35991600 | -4.59070200 | 1.73783500  |
| C | -1.82346100 | -3.39179200 | 2.63010000  |
| H | -2.07196300 | -3.73064000 | 3.64744900  |
| H | -0.73629600 | -3.22069400 | 2.58351700  |
| H | -2.31405500 | -2.42387900 | 2.45678000  |
| C | -1.56962500 | -5.75756000 | 1.77220900  |
| H | -1.92373500 | -6.48831500 | 1.03156300  |
| H | -0.48262600 | -5.62952500 | 1.64111800  |
| H | -1.73882500 | -6.15975800 | 2.78069500  |
| C | -4.59522300 | -1.34394400 | -0.34610200 |
| H | -3.90546500 | -0.49371600 | -0.25319700 |
| C | -4.96756500 | -1.45073900 | -1.82062900 |
| H | -5.42082600 | -0.50907600 | -2.16197200 |
| H | -4.05854500 | -1.61085700 | -2.41563700 |
| H | -5.67493100 | -2.28231700 | -1.98764500 |
| C | -5.80795500 | -1.10256300 | 0.54077000  |

|   |             |             |             |
|---|-------------|-------------|-------------|
| H | -6.53452300 | -1.92938400 | 0.45437000  |
| H | -5.51016800 | -1.01280500 | 1.59528800  |
| H | -6.31146200 | -0.17438600 | 0.23738900  |
| C | 4.52362900  | 0.11147900  | 1.65500000  |
| H | 5.56656100  | 0.43815700  | 1.51086000  |
| C | 3.87977900  | 1.02547800  | 2.68982400  |
| H | 3.83409800  | 2.05955700  | 2.32003900  |
| H | 2.85885000  | 0.67344500  | 2.90201100  |
| H | 4.45131000  | 1.00473800  | 3.62879900  |
| C | 4.52721800  | -1.34233400 | 2.12615100  |
| H | 3.49023500  | -1.66230900 | 2.31114900  |
| H | 4.97741300  | -1.98986700 | 1.35846600  |
| H | 5.10164700  | -1.45490200 | 3.05838500  |
| C | 6.26370100  | -0.66324400 | -2.19318200 |
| H | 5.74048100  | -1.58332000 | -2.48904100 |
| C | 7.73856700  | -0.96263200 | -1.95256400 |
| H | 8.27133000  | -0.05337800 | -1.62704600 |
| H | 7.85905500  | -1.72744600 | -1.17298500 |
| H | 8.22046300  | -1.31678900 | -2.87510300 |
| C | 6.06174300  | 0.37138800  | -3.29960100 |
| H | 4.98797800  | 0.54837800  | -3.44257100 |
| H | 6.55277000  | 1.32174300  | -3.03251500 |
| H | 6.49067400  | 0.02084500  | -4.25060900 |
| C | -2.56079700 | -2.73337300 | -0.19548300 |
| C | 4.27759900  | -0.30057500 | -0.78591700 |
| C | 0.32830200  | -0.17713400 | 1.87813500  |
| O | 1.03535000  | -0.90272400 | 2.51540100  |
| O | 0.79018800  | 0.74315000  | 1.01208400  |
| I | -3.23001500 | 2.14191600  | -1.85062300 |
| C | -1.51874500 | 0.78104900  | 0.96413400  |
| C | -0.27472800 | 1.60070600  | 0.57302300  |
| O | -0.99622800 | -0.14363400 | 1.93630300  |
| H | -2.30402500 | 1.38505700  | 1.43133500  |
| H | -1.92476900 | 0.22380500  | 0.11208700  |
| C | -0.17698700 | 2.95108600  | 1.24960100  |
| C | 0.71415600  | 3.18305000  | 2.29911900  |
| C | -1.02097000 | 3.98315400  | 0.81943400  |
| C | 0.76100000  | 4.43235400  | 2.92031500  |
| H | 1.38437400  | 2.38719300  | 2.62330500  |
| C | -0.96971400 | 5.22704200  | 1.44357200  |
| H | -1.72003400 | 3.79487700  | -0.00379200 |
| C | -0.08014800 | 5.45729700  | 2.49505400  |
| H | 1.46412600  | 4.60098600  | 3.73834000  |
| H | -1.63171800 | 6.02418700  | 1.10049800  |

|   |             |            |             |
|---|-------------|------------|-------------|
| H | -0.04191200 | 6.43503000 | 2.97945300  |
| H | -0.22063200 | 1.70189200 | -0.51903000 |

**G1-TS'**

|   |             |             |             |
|---|-------------|-------------|-------------|
| C | 2.49909500  | -0.48819700 | 0.47351200  |
| N | 1.96239500  | -1.46078700 | -0.22442800 |
| C | 0.64855300  | -1.88883900 | 0.08458300  |
| C | 0.33326200  | -2.34968800 | 1.37031200  |
| C | -0.36498400 | -1.83617000 | -0.88062600 |
| C | -0.98109000 | -2.66766100 | 1.70180900  |
| H | 1.12963900  | -2.41945200 | 2.11512200  |
| C | -1.67979100 | -2.14573400 | -0.54064600 |
| H | -0.12331500 | -1.51825700 | -1.89768100 |
| C | -1.99831700 | -2.54182400 | 0.75693100  |
| H | -1.21526600 | -2.99413700 | 2.71739300  |
| H | -2.48728200 | -2.02869600 | -1.26658600 |
| H | -3.04531500 | -2.71088500 | 1.01312500  |
| N | 3.84265000  | -0.25753700 | 0.41575400  |
| H | 4.13340000  | 0.69485800  | 0.59147300  |
| N | 1.78273900  | 0.31743900  | 1.28776900  |
| H | 0.76193400  | 0.27318200  | 1.20632500  |
| C | 2.30913400  | 1.31394600  | 2.20132200  |
| H | 3.26299700  | 0.92548000  | 2.59880600  |
| C | 2.55945100  | 2.65829500  | 1.51176300  |
| H | 2.96904100  | 3.39078900  | 2.22371400  |
| H | 3.25872000  | 2.56919500  | 0.66641800  |
| H | 1.61573700  | 3.04998300  | 1.10136900  |
| C | 1.32063700  | 1.46767900  | 3.35279200  |
| H | 1.16349400  | 0.50599800  | 3.86002800  |
| H | 1.68276400  | 2.20575400  | 4.08193400  |
| H | 0.34935700  | 1.80387700  | 2.95930300  |
| C | 4.85254800  | -1.14268700 | -0.15675500 |
| H | 4.72662800  | -1.19538700 | -1.24962500 |
| C | 6.21240500  | -0.51244400 | 0.12322400  |
| H | 7.01149500  | -1.12051200 | -0.32134400 |
| H | 6.27843400  | 0.49835100  | -0.30802300 |
| H | 6.38955200  | -0.44486100 | 1.20803500  |
| C | 4.77073000  | -2.55149200 | 0.42418800  |
| H | 3.81545400  | -3.02963100 | 0.17577500  |
| H | 5.58500200  | -3.16523600 | 0.01254400  |
| H | 4.87860700  | -2.51267600 | 1.51952600  |
| C | -1.52804700 | 1.30726500  | -0.07654000 |
| H | -2.12977200 | 0.68622900  | -0.75480700 |
| C | -2.13164900 | 1.58168600  | 1.23114300  |

|   |             |             |             |
|---|-------------|-------------|-------------|
| H | -1.83524100 | 2.48532000  | 1.77909600  |
| H | -3.13145500 | 1.17011400  | 1.41151300  |
| O | -1.10674300 | 0.61032900  | 1.09088100  |
| C | -0.49317100 | 2.20134400  | -0.68790900 |
| C | 0.58299900  | 1.62843700  | -1.37937600 |
| C | -0.55713600 | 3.59343700  | -0.57824600 |
| C | 1.58360300  | 2.42353300  | -1.93161200 |
| H | 0.65167300  | 0.54405600  | -1.48027500 |
| C | 0.44059500  | 4.39579300  | -1.13640500 |
| H | -1.40129200 | 4.05129900  | -0.05842600 |
| C | 1.51427800  | 3.81297400  | -1.80885300 |
| H | 2.41005800  | 1.93379300  | -2.45009200 |
| H | 0.37629800  | 5.48196900  | -1.04573400 |
| H | 2.29418800  | 4.44283500  | -2.24166000 |
| I | -5.07745400 | -0.38316100 | -0.20817500 |
| C | 2.49275600  | -1.69973300 | -2.08551400 |
| O | 2.34551700  | -2.85130400 | -2.29595800 |
| O | 2.79871200  | -0.61141900 | -2.45769800 |

**G1-IM1'**

|   |             |             |             |
|---|-------------|-------------|-------------|
| C | 2.48620600  | -0.47038400 | 0.42316000  |
| N | 1.92002900  | -1.40345300 | -0.34389500 |
| C | 0.61518400  | -1.88124100 | -0.02298200 |
| C | 0.34264900  | -2.36800700 | 1.25846300  |
| C | -0.41294700 | -1.81188900 | -0.96826300 |
| C | -0.96320600 | -2.69590900 | 1.61599700  |
| H | 1.15769700  | -2.45030900 | 1.98127300  |
| C | -1.71632800 | -2.13467700 | -0.60179300 |
| H | -0.18875300 | -1.48191700 | -1.98456400 |
| C | -2.00122600 | -2.55339200 | 0.69734300  |
| H | -1.17170800 | -3.04455600 | 2.62949400  |
| H | -2.54116700 | -2.00858400 | -1.30595800 |
| H | -3.04154200 | -2.72895200 | 0.97563200  |
| N | 3.82402600  | -0.28959000 | 0.41736100  |
| H | 4.13656900  | 0.63317000  | 0.68973300  |
| N | 1.75533900  | 0.29018700  | 1.24927500  |
| H | 0.73443600  | 0.27235200  | 1.13227300  |
| C | 2.27123100  | 1.24402200  | 2.21595600  |
| H | 3.20668300  | 0.82350200  | 2.62487700  |
| C | 2.55916500  | 2.60173000  | 1.57033500  |
| H | 2.95995600  | 3.30803100  | 2.31254300  |
| H | 3.27730400  | 2.52482700  | 0.73967900  |
| H | 1.63128100  | 3.01685600  | 1.14711700  |
| C | 1.25431700  | 1.37348100  | 3.34452700  |

|   |             |             |             |
|---|-------------|-------------|-------------|
| H | 1.06384100  | 0.39710600  | 3.81063600  |
| H | 1.61400200  | 2.07452900  | 4.11004000  |
| H | 0.30157200  | 1.74694200  | 2.94059300  |
| C | 4.85284400  | -1.15807600 | -0.16312800 |
| H | 4.81603600  | -1.06628100 | -1.25898000 |
| C | 6.19724800  | -0.63356200 | 0.32963900  |
| H | 7.01453700  | -1.20404000 | -0.13087300 |
| H | 6.33578900  | 0.42500100  | 0.06030900  |
| H | 6.27656900  | -0.73290700 | 1.42367400  |
| C | 4.65966200  | -2.62071100 | 0.23196200  |
| H | 3.76750200  | -3.06159000 | -0.22878000 |
| H | 5.53327200  | -3.19746300 | -0.10436100 |
| H | 4.58530800  | -2.70914000 | 1.32753400  |
| C | -1.51600300 | 1.34290700  | -0.12262100 |
| H | -2.13034200 | 0.74608200  | -0.81111300 |
| C | -2.10854000 | 1.59824400  | 1.19414100  |
| H | -1.79187200 | 2.48396200  | 1.75971200  |
| H | -3.11390900 | 1.19923700  | 1.37231200  |
| O | -1.10329200 | 0.60943800  | 1.02773700  |
| C | -0.45914200 | 2.22736000  | -0.71081500 |
| C | 0.60700300  | 1.64389700  | -1.40806800 |
| C | -0.48353000 | 3.61736200  | -0.56193400 |
| C | 1.64318200  | 2.42021700  | -1.91999400 |
| H | 0.64647300  | 0.56318800  | -1.54944600 |
| C | 0.54440700  | 4.40370700  | -1.08725300 |
| H | -1.31889800 | 4.08637600  | -0.03765100 |
| C | 1.61165300  | 3.80728800  | -1.75929700 |
| H | 2.46087800  | 1.90751400  | -2.43098200 |
| H | 0.51060400  | 5.48856800  | -0.96836100 |
| H | 2.41633700  | 4.42603500  | -2.16183700 |
| I | -5.06691100 | -0.36510200 | -0.17462500 |
| C | 2.43626300  | -1.59784900 | -1.86215200 |
| O | 2.26415700  | -2.73081600 | -2.24530400 |
| O | 2.88682300  | -0.55290500 | -2.31091900 |

**G1-TS1'**

|   |             |             |             |
|---|-------------|-------------|-------------|
| C | 2.38369300  | -0.02805300 | 0.25185300  |
| N | 1.96502800  | -1.17540300 | -0.29855900 |
| C | 0.93383000  | -1.95743400 | 0.27983600  |
| C | 0.86164300  | -2.17849800 | 1.66051200  |
| C | -0.05851300 | -2.50421700 | -0.54687900 |
| C | -0.21772000 | -2.86838200 | 2.20507800  |
| H | 1.63143400  | -1.76876700 | 2.31466400  |
| C | -1.12895800 | -3.20190000 | 0.00389500  |



|   |             |             |             |
|---|-------------|-------------|-------------|
| H | -0.00489600 | -2.35724900 | -1.62579000 |
| C | -1.22398800 | -3.37448000 | 1.38431900  |
| H | -0.27548800 | -2.99708200 | 3.28721700  |
| H | -1.91865600 | -3.56940500 | -0.65197700 |
| H | -2.08409700 | -3.88769900 | 1.81552000  |
| N | 3.56393200  | 0.51321800  | -0.14018000 |
| H | 3.59790400  | 1.52310000  | -0.08920300 |
| N | 1.69393600  | 0.60528900  | 1.19835100  |
| H | 0.69505100  | 0.37045100  | 1.37858000  |
| C | 2.15394000  | 1.74440200  | 1.98587900  |
| H | 3.24234200  | 1.82854700  | 1.84428500  |
| C | 1.45777600  | 3.01677500  | 1.50603800  |
| H | 1.81901900  | 3.89619700  | 2.06012500  |
| H | 1.61434300  | 3.17810400  | 0.42774300  |
| H | 0.37701400  | 2.89559000  | 1.66958200  |
| C | 1.88418200  | 1.47555600  | 3.46515600  |
| H | 2.44303400  | 0.59123200  | 3.80546400  |
| H | 2.19348000  | 2.34008200  | 4.07114500  |
| H | 0.80805500  | 1.29469700  | 3.60070500  |
| C | 4.68189800  | -0.12432800 | -0.83620400 |
| H | 4.41571300  | -0.27926600 | -1.89288000 |
| C | 5.85130200  | 0.85262500  | -0.77268200 |
| H | 6.70987200  | 0.44955800  | -1.32616000 |
| H | 5.58556400  | 1.82064900  | -1.22475000 |
| H | 6.15806800  | 1.02329700  | 0.27136100  |
| C | 5.05298600  | -1.46278400 | -0.20294500 |
| H | 4.26232800  | -2.21100000 | -0.33606100 |
| H | 5.96288000  | -1.84792600 | -0.68551100 |
| H | 5.25701500  | -1.32711100 | 0.87115700  |
| C | -1.82713500 | 0.37699900  | 0.61405200  |
| H | -1.50353100 | -0.64294400 | 0.42077500  |
| C | -2.16565600 | 0.65821600  | 2.00607300  |
| H | -2.72063700 | 1.59683200  | 2.19069600  |
| H | -2.67860000 | -0.17981700 | 2.51127100  |
| O | -0.79816100 | 0.72510400  | 2.16551000  |
| C | -1.34236600 | 1.42241400  | -0.31386100 |
| C | -0.38983400 | 1.08222700  | -1.28073500 |
| C | -1.74528600 | 2.75991600  | -0.20821700 |
| C | 0.18769700  | 2.05330100  | -2.09643400 |
| H | -0.07081300 | 0.04607900  | -1.39450200 |
| C | -1.18357100 | 3.73105500  | -1.03150700 |
| H | -2.50847600 | 3.03271400  | 0.52243700  |
| C | -0.20893900 | 3.38440300  | -1.97214000 |
| H | 0.95138000  | 1.73720000  | -2.80924600 |

|   |             |             |             |
|---|-------------|-------------|-------------|
| H | -1.50880200 | 4.76952500  | -0.94032900 |
| H | 0.23287500  | 4.15260700  | -2.61046200 |
| I | -4.19831500 | -0.31118500 | -0.54654400 |
| C | 2.29594900  | -1.46808400 | -1.86194500 |
| O | 2.53693300  | -2.64065300 | -2.04460000 |
| O | 2.22991300  | -0.45014200 | -2.52855300 |

**G1-IM2'**

|   |             |             |             |
|---|-------------|-------------|-------------|
| C | 2.37339600  | 0.04718600  | 0.31267000  |
| N | 1.91277100  | -1.10487400 | -0.30800100 |
| C | 0.88925800  | -1.88686800 | 0.23674900  |
| C | 0.65515100  | -1.96175200 | 1.62459100  |
| C | 0.03069300  | -2.61909200 | -0.60939000 |
| C | -0.42242900 | -2.68237400 | 2.12988000  |
| H | 1.30161100  | -1.41335500 | 2.30586300  |
| C | -1.03876800 | -3.34220100 | -0.08904200 |
| H | 0.21016400  | -2.61502700 | -1.68262600 |
| C | -1.29142400 | -3.36953600 | 1.28195600  |
| H | -0.58771800 | -2.69266100 | 3.20960300  |
| H | -1.69692700 | -3.87702100 | -0.77671100 |
| H | -2.14658000 | -3.91656300 | 1.68145100  |
| N | 3.66511700  | 0.42251300  | -0.00995700 |
| H | 3.78304900  | 1.42393300  | -0.08781400 |
| N | 1.64490700  | 0.70961000  | 1.14727400  |
| H | -0.09379900 | 0.65211100  | 1.74853300  |
| C | 2.17840900  | 1.84725700  | 1.87333900  |
| H | 3.27396300  | 1.92913400  | 1.74721200  |
| C | 1.52429900  | 3.12469200  | 1.34179700  |
| H | 1.86893400  | 4.01218700  | 1.89610300  |
| H | 1.74671800  | 3.26208900  | 0.27263000  |
| H | 0.43145300  | 3.03592500  | 1.44284400  |
| C | 1.92269300  | 1.67330000  | 3.37267700  |
| H | 2.42219200  | 0.76345300  | 3.73874700  |
| H | 2.31918400  | 2.53403100  | 3.93397800  |
| H | 0.84518900  | 1.58347200  | 3.56670200  |
| C | 4.69770100  | -0.35839100 | -0.68329100 |
| H | 4.44365200  | -0.50939200 | -1.74562800 |
| C | 5.98028400  | 0.46673800  | -0.62228400 |
| H | 6.79391700  | -0.05181700 | -1.14831700 |
| H | 5.84215200  | 1.44887700  | -1.10136100 |
| H | 6.28335200  | 0.62899300  | 0.42413100  |
| C | 4.90107700  | -1.72188100 | -0.02712600 |
| H | 4.03254500  | -2.37224800 | -0.18570000 |
| H | 5.77658400  | -2.21384800 | -0.47696700 |

|   |             |             |             |
|---|-------------|-------------|-------------|
| H | 5.08152900  | -1.59599300 | 1.05246000  |
| C | -2.01487200 | 0.22860900  | 0.26640500  |
| H | -1.41634700 | -0.66300900 | 0.05192100  |
| C | -2.08551700 | 0.45892300  | 1.77432100  |
| H | -2.88359500 | 1.18608600  | 2.00623500  |
| H | -2.36955900 | -0.50131000 | 2.24709200  |
| O | -0.88490500 | 0.95758100  | 2.26530500  |
| C | -1.50007700 | 1.38963900  | -0.52602300 |
| C | -0.41541400 | 1.18669300  | -1.38120700 |
| C | -2.01495000 | 2.68352300  | -0.37540100 |
| C | 0.16000200  | 2.25145000  | -2.07333100 |
| H | 0.02328700  | 0.19569900  | -1.50122100 |
| C | -1.44951800 | 3.74813200  | -1.07038300 |
| H | -2.86259400 | 2.85385800  | 0.29319200  |
| C | -0.36001000 | 3.53473000  | -1.92144600 |
| H | 1.02550800  | 2.03472100  | -2.70210900 |
| H | -1.85610000 | 4.75383600  | -0.94458100 |
| H | 0.08589200  | 4.37631100  | -2.45616100 |
| I | -4.00419300 | -0.41409200 | -0.41847300 |
| C | 2.23157100  | -1.25791800 | -1.82101100 |
| O | 2.47646500  | -2.40977900 | -2.15001500 |
| O | 2.19289800  | -0.19048800 | -2.43058200 |

**G1-TS2'**

|   |             |             |             |
|---|-------------|-------------|-------------|
| C | 2.07067700  | 0.33769500  | -0.25462000 |
| N | 1.60253000  | -0.86226900 | -0.75947500 |
| C | 1.13600000  | -1.89215800 | 0.07019900  |
| C | 1.53227700  | -1.98401600 | 1.41650500  |
| C | 0.24212900  | -2.85870500 | -0.42801200 |
| C | 1.01990800  | -2.97991700 | 2.24169800  |
| H | 2.20738900  | -1.23887100 | 1.83755700  |
| C | -0.24396900 | -3.86280100 | 0.40494200  |
| H | -0.06015800 | -2.81956300 | -1.47247600 |
| C | 0.12768800  | -3.93038200 | 1.74664600  |
| H | 1.31587200  | -2.99525000 | 3.29264500  |
| H | -0.94624100 | -4.59093900 | -0.00628600 |
| H | -0.27911500 | -4.70178400 | 2.40156700  |
| N | 3.21231700  | 0.82195300  | -0.81263300 |
| H | 3.39202100  | 1.80152300  | -0.63922800 |
| N | 1.45542600  | 0.96255800  | 0.70866000  |
| H | 0.33905100  | 0.51091100  | 1.32891700  |
| C | 2.00112000  | 2.18311900  | 1.28919900  |
| H | 2.34959700  | 2.85500000  | 0.47755900  |
| C | 0.89911200  | 2.93858100  | 2.02797100  |

|   |             |             |             |
|---|-------------|-------------|-------------|
| H | 1.29268200  | 3.89646300  | 2.40051000  |
| H | 0.04790700  | 3.13940000  | 1.36142800  |
| H | 0.54626000  | 2.34212600  | 2.87990800  |
| C | 3.17051000  | 1.86487600  | 2.22595900  |
| H | 3.96383000  | 1.31363900  | 1.69940700  |
| H | 3.60171100  | 2.78884100  | 2.64097600  |
| H | 2.79122700  | 1.24427900  | 3.05040800  |
| C | 4.04338000  | 0.20829100  | -1.84912600 |
| H | 3.46718500  | 0.14266100  | -2.78593200 |
| C | 5.22135900  | 1.14976000  | -2.07788300 |
| H | 5.85881500  | 0.77008600  | -2.88736700 |
| H | 4.87733300  | 2.15599200  | -2.36268900 |
| H | 5.83269500  | 1.23116700  | -1.16478900 |
| C | 4.52890800  | -1.18702000 | -1.45930600 |
| H | 3.70802300  | -1.91359400 | -1.46261700 |
| H | 5.27884700  | -1.52472600 | -2.19016300 |
| H | 4.99731200  | -1.15873000 | -0.46265100 |
| C | -1.64714900 | 0.14242400  | -0.20353200 |
| H | -0.78384100 | -0.20379700 | -0.78430300 |
| C | -1.61400900 | -0.39648000 | 1.22524100  |
| H | -2.57469000 | -0.21613100 | 1.73423000  |
| H | -1.45118300 | -1.48715900 | 1.20698400  |
| O | -0.59557200 | 0.25650300  | 1.93219300  |
| C | -1.75742300 | 1.63259700  | -0.32511700 |
| C | -0.94437400 | 2.29857300  | -1.25078100 |
| C | -2.61247000 | 2.37315700  | 0.49872500  |
| C | -0.99120800 | 3.69008800  | -1.34275000 |
| H | -0.26531600 | 1.71158000  | -1.88045500 |
| C | -2.65420800 | 3.76131600  | 0.40444000  |
| H | -3.24343400 | 1.85675600  | 1.22503300  |
| C | -1.84252500 | 4.42454100  | -0.51762500 |
| H | -0.35159200 | 4.20196300  | -2.06431300 |
| H | -3.31833300 | 4.33077600  | 1.05741000  |
| H | -1.87221700 | 5.51372100  | -0.58844800 |
| I | -3.31687400 | -0.85218700 | -1.23321900 |
| C | 1.39297000  | -0.89873400 | -2.28929800 |
| O | 1.06279600  | 0.20214600  | -2.73334600 |
| O | 1.60790900  | -1.98662000 | -2.79915800 |
| C | -0.22678300 | -0.38443200 | 3.56402300  |
| O | -1.14559300 | -1.06709100 | 3.86922700  |
| O | 0.82911600  | 0.09151500  | 3.83819900  |

**G1-IM3'**

|   |            |            |             |
|---|------------|------------|-------------|
| C | 3.31708900 | 0.38935100 | -0.59264600 |
|---|------------|------------|-------------|

|   |             |             |             |
|---|-------------|-------------|-------------|
| N | 3.22686500  | -0.93176900 | -0.32712900 |
| C | 2.30835100  | -1.41773900 | 0.63314300  |
| C | 2.09108600  | -0.71969400 | 1.82581300  |
| C | 1.61386100  | -2.61300700 | 0.40733800  |
| C | 1.17055000  | -1.18523200 | 2.76086100  |
| H | 2.60466500  | 0.22708600  | 2.00277100  |
| C | 0.71846400  | -3.08804200 | 1.35880000  |
| H | 1.79638900  | -3.16871200 | -0.51027500 |
| C | 0.48226000  | -2.37483900 | 2.53556500  |
| H | 0.97148300  | -0.58906000 | 3.65219400  |
| H | 0.18322500  | -4.02042500 | 1.16760300  |
| H | -0.24285200 | -2.73868700 | 3.26589100  |
| N | 4.52493700  | 0.93847400  | -0.84276300 |
| H | 4.50399300  | 1.82019600  | -1.33688300 |
| N | 2.24589700  | 1.17599300  | -0.59513900 |
| H | 1.27836600  | 0.75921500  | -0.39556700 |
| C | 2.31117600  | 2.63525700  | -0.59725800 |
| H | 3.00333000  | 2.95704600  | -1.39886300 |
| C | 0.93891400  | 3.20043100  | -0.95086200 |
| H | 1.01609700  | 4.28902900  | -1.08816100 |
| H | 0.56086500  | 2.75173900  | -1.88081600 |
| H | 0.23623700  | 2.99202200  | -0.13251800 |
| C | 2.79910800  | 3.17127800  | 0.74963700  |
| H | 3.78902400  | 2.76106000  | 0.99978100  |
| H | 2.87304400  | 4.26913600  | 0.72384200  |
| H | 2.06877900  | 2.86817100  | 1.51375100  |
| C | 5.85704800  | 0.36527100  | -0.64328800 |
| H | 6.05352200  | -0.35801300 | -1.44863100 |
| C | 6.84864500  | 1.51919300  | -0.75365300 |
| H | 7.87682400  | 1.14026100  | -0.68112700 |
| H | 6.75091500  | 2.03737900  | -1.72045600 |
| H | 6.68963100  | 2.25072700  | 0.05466000  |
| C | 5.98879300  | -0.33535500 | 0.70924400  |
| H | 5.42427300  | -1.27466600 | 0.75062100  |
| H | 7.04882800  | -0.57022400 | 0.88583000  |
| H | 5.64148000  | 0.33066700  | 1.51569100  |
| C | -2.93087200 | -0.22694100 | -0.23000600 |
| H | -2.15778100 | -0.23708800 | -1.00045500 |
| C | -2.31120800 | -0.68310500 | 1.10076400  |
| H | -3.10843300 | -0.98808500 | 1.79533100  |
| H | -1.65289000 | -1.54378500 | 0.89967000  |
| O | -1.61974900 | 0.34802900  | 1.74674000  |
| C | -3.58000700 | 1.12583900  | -0.16574700 |
| C | -2.87166500 | 2.21159700  | -0.69235000 |

|   |             |             |             |
|---|-------------|-------------|-------------|
| C | -4.79903300 | 1.36155500  | 0.47847300  |
| C | -3.37842400 | 3.50621400  | -0.58795400 |
| H | -1.89940700 | 2.02880100  | -1.15528000 |
| C | -5.30709500 | 2.65381300  | 0.57923800  |
| H | -5.35969100 | 0.51895200  | 0.89011200  |
| C | -4.59924700 | 3.73121100  | 0.04438300  |
| H | -2.80853300 | 4.34218800  | -0.99778900 |
| H | -6.26264900 | 2.82181600  | 1.07969200  |
| H | -4.99834000 | 4.74396400  | 0.12592400  |
| I | -4.31187900 | -1.79384400 | -0.89324700 |
| C | 4.05310600  | -1.95277900 | -1.21779300 |
| O | 4.34017100  | -1.47887500 | -2.30616000 |
| O | 4.25387900  | -3.00498700 | -0.63990500 |
| C | -0.47148200 | 0.85230300  | 1.14279300  |
| O | -0.20811300 | 0.39259000  | -0.00177400 |
| O | 0.12991500  | 1.69508100  | 1.79532700  |

#### G1-TS3'

|   |             |             |             |
|---|-------------|-------------|-------------|
| C | 3.03444300  | 0.31176300  | -0.49387700 |
| N | 2.88626000  | -1.02001200 | -0.54451500 |
| C | 1.95762900  | -1.65922300 | 0.31612500  |
| C | 2.01645300  | -1.43377100 | 1.69317700  |
| C | 0.97390000  | -2.50696900 | -0.20401600 |
| C | 1.08034600  | -2.01868900 | 2.54177300  |
| H | 2.77861000  | -0.76208800 | 2.09383600  |
| C | 0.04437800  | -3.09441100 | 0.64747600  |
| H | 0.94872400  | -2.69562300 | -1.27720900 |
| C | 0.08784600  | -2.84572000 | 2.02173200  |
| H | 1.11079600  | -1.79580200 | 3.60889600  |
| H | -0.73074000 | -3.74229800 | 0.23296200  |
| H | -0.65232100 | -3.29653900 | 2.68555100  |
| N | 4.21943800  | 0.88078400  | -0.79001600 |
| H | 4.17934900  | 1.86305300  | -1.02549000 |
| N | 2.02330700  | 1.11223200  | -0.13832800 |
| H | 1.10788000  | 0.67867900  | 0.09712500  |
| C | 2.16911700  | 2.51345600  | 0.25270400  |
| H | 2.75793900  | 3.03273200  | -0.52652600 |
| C | 0.79297100  | 3.17214800  | 0.28204400  |
| H | 0.90824400  | 4.25826600  | 0.40762900  |
| H | 0.23689900  | 2.97896900  | -0.64679000 |
| H | 0.21082800  | 2.78215200  | 1.12725800  |
| C | 2.87399200  | 2.63742600  | 1.60388500  |
| H | 3.86433000  | 2.15801400  | 1.57797500  |
| H | 3.00606100  | 3.69602100  | 1.87361700  |

|   |             |             |             |
|---|-------------|-------------|-------------|
| H | 2.24626400  | 2.14390600  | 2.36038000  |
| C | 5.54358600  | 0.26315400  | -0.88934400 |
| H | 5.61993300  | -0.25109100 | -1.85780200 |
| C | 6.55883100  | 1.40047200  | -0.83853500 |
| H | 7.57408900  | 1.00487900  | -0.97509100 |
| H | 6.37645600  | 2.13512000  | -1.63823800 |
| H | 6.51615400  | 1.91976300  | 0.13221900  |
| C | 5.80002600  | -0.73884900 | 0.23524900  |
| H | 5.18658700  | -1.64310200 | 0.14321800  |
| H | 6.85631500  | -1.04369700 | 0.20520700  |
| H | 5.60239700  | -0.27048900 | 1.21327900  |
| C | -2.31938000 | -0.14415900 | 0.14724300  |
| H | -1.83025900 | -0.82868200 | -0.53628000 |
| C | -2.59348800 | -0.57842400 | 1.58228300  |
| H | -3.62768700 | -0.34390100 | 1.85585900  |
| H | -2.45125300 | -1.66738100 | 1.64451200  |
| O | -1.76520000 | 0.08375200  | 2.51790300  |
| C | -2.55447900 | 1.24463700  | -0.30655700 |
| C | -2.26729600 | 1.60026900  | -1.63099700 |
| C | -2.97911900 | 2.23424500  | 0.58774600  |
| C | -2.40554700 | 2.91691900  | -2.05407400 |
| H | -1.94521300 | 0.82454600  | -2.32869600 |
| C | -3.11236500 | 3.55453600  | 0.16225700  |
| H | -3.18026200 | 1.97507400  | 1.62878900  |
| C | -2.82817300 | 3.90148700  | -1.15744100 |
| H | -2.18196500 | 3.17858500  | -3.08995100 |
| H | -3.43868700 | 4.31810800  | 0.87054300  |
| H | -2.93447100 | 4.93596600  | -1.48872400 |
| I | -4.54998700 | -1.23554900 | -0.80055500 |
| C | 3.54677600  | -1.88515300 | -1.73048900 |
| O | 3.82720800  | -1.19170000 | -2.69225500 |
| O | 3.63268700  | -3.05354600 | -1.41710300 |
| C | -0.55506400 | 0.49187000  | 2.02223200  |
| O | -0.44143500 | 0.28733300  | 0.76595800  |
| O | 0.23911500  | 1.01264200  | 2.77897300  |

**G1-IM4'**

|   |            |             |             |
|---|------------|-------------|-------------|
| C | 3.17618200 | 0.13976700  | -0.53434100 |
| N | 2.73722000 | -1.11033500 | -0.51512000 |
| C | 1.62999000 | -1.47685500 | 0.29195100  |
| C | 1.66580200 | -1.25491500 | 1.67192700  |
| C | 0.50943400 | -2.08402500 | -0.28420300 |
| C | 0.58178200 | -1.62439300 | 2.46619100  |
| H | 2.54362700 | -0.77987600 | 2.11557100  |

|   |             |             |             |
|---|-------------|-------------|-------------|
| C | -0.57107600 | -2.45737800 | 0.51103300  |
| H | 0.49457500  | -2.26154500 | -1.36038100 |
| C | -0.53678300 | -2.22517100 | 1.88865400  |
| H | 0.61135900  | -1.42969700 | 3.53976400  |
| H | -1.46556900 | -2.89334700 | 0.05909000  |
| H | -1.39139100 | -2.51718000 | 2.50232200  |
| N | 4.46005000  | 0.42260300  | -0.83673700 |
| H | 4.63047100  | 1.35832700  | -1.17948400 |
| N | 2.36718400  | 1.18250700  | -0.24970800 |
| H | 1.38662300  | 0.96707100  | -0.06090800 |
| C | 2.83035700  | 2.51755600  | 0.12163400  |
| H | 3.54280800  | 2.86508800  | -0.64780300 |
| C | 1.64642600  | 3.47582100  | 0.09597600  |
| H | 1.99902700  | 4.50660000  | 0.23876700  |
| H | 1.10494000  | 3.41329700  | -0.85855600 |
| H | 0.95829400  | 3.22748200  | 0.91439800  |
| C | 3.51749100  | 2.51210300  | 1.48659200  |
| H | 4.36915700  | 1.81623400  | 1.49370600  |
| H | 3.88789800  | 3.51767900  | 1.73544000  |
| H | 2.78757900  | 2.19956200  | 2.24672400  |
| C | 5.62304900  | -0.46862800 | -0.82792500 |
| H | 5.61686800  | -1.06881300 | -1.74900600 |
| C | 6.85827700  | 0.42640200  | -0.82102000 |
| H | 7.76749700  | -0.18660400 | -0.87826800 |
| H | 6.86085000  | 1.10888600  | -1.68504500 |
| H | 6.90095300  | 1.02588800  | 0.10226500  |
| C | 5.62287300  | -1.40167400 | 0.38218500  |
| H | 4.82238600  | -2.15001400 | 0.33740800  |
| H | 6.58258100  | -1.93707500 | 0.41699700  |
| H | 5.51795100  | -0.81925800 | 1.31203300  |
| C | -1.84808900 | 0.71454700  | 0.25861200  |
| H | -1.82932800 | -0.20016100 | -0.34671900 |
| C | -2.56714900 | 0.44692000  | 1.59543900  |
| H | -3.53534300 | 0.95327600  | 1.67015800  |
| H | -2.70027400 | -0.62597500 | 1.77172400  |
| O | -1.66835600 | 1.00063100  | 2.56860500  |
| C | -2.40550600 | 1.87442900  | -0.53109200 |
| C | -3.33084000 | 1.62942000  | -1.55057200 |
| C | -2.04661400 | 3.19112900  | -0.22634300 |
| C | -3.88338800 | 2.69663400  | -2.25734800 |
| H | -3.62737800 | 0.59727300  | -1.76190200 |
| C | -2.59955000 | 4.25497000  | -0.93772000 |
| H | -1.32016400 | 3.39144100  | 0.56413800  |
| C | -3.51896700 | 4.00902300  | -1.95675700 |



|   |             |             |             |
|---|-------------|-------------|-------------|
| H | -4.60583100 | 2.49754800  | -3.05069200 |
| H | -2.30933800 | 5.27893500  | -0.69468500 |
| H | -3.95276100 | 4.84068600  | -2.51527900 |
| I | -4.38729600 | -1.93531700 | -0.31972800 |
| C | 3.27611800  | -2.23212300 | -1.63552400 |
| O | 3.68089000  | -1.67018100 | -2.62858400 |
| O | 3.14152500  | -3.34297200 | -1.18978300 |
| C | -0.48118900 | 1.23508200  | 2.02820600  |
| O | -0.51020600 | 1.01471400  | 0.70049600  |
| O | 0.48560500  | 1.62541100  | 2.61319500  |

**G10-COM**

|   |             |             |             |
|---|-------------|-------------|-------------|
| H | 2.77365900  | -4.78334600 | 0.86472600  |
| H | 2.83378900  | -1.12015100 | -2.13797600 |
| H | 1.33031800  | 0.23174000  | -3.53358600 |
| H | 2.96811400  | 1.36464100  | -0.34607300 |
| H | 0.02652300  | 2.50222500  | -0.36117000 |
| O | 1.44864200  | 1.35678700  | 2.21672900  |
| N | 1.87445600  | -2.30087700 | 0.52582900  |
| N | 1.12268200  | -0.63994400 | -1.02215100 |
| N | 0.09706000  | -0.94775200 | 1.08771000  |
| N | 0.67688600  | 2.50042700  | 0.41962200  |
| C | 1.10291200  | -1.34001900 | 0.18749500  |
| C | 0.18884900  | -1.57527200 | 2.40948600  |
| C | -1.61977700 | 0.64792800  | 1.94396900  |
| C | -0.41822100 | 0.41264800  | 1.01646400  |
| C | 0.66911600  | 1.45175900  | 1.28737600  |
| C | 1.57009500  | 3.63296600  | 0.61619900  |
| C | 2.77216200  | -3.00360200 | -0.36380100 |
| C | 3.50122200  | -4.06736700 | 0.45357200  |
| C | 2.03091000  | -3.64544000 | -1.53995400 |
| C | 2.36722400  | -0.23459300 | -1.67939700 |
| C | 3.36258600  | 0.40477400  | -0.71398200 |
| C | 2.00019100  | 0.71891900  | -2.80968000 |
| C | -1.38768000 | 0.12554100  | 3.35322100  |
| C | 1.80857900  | 4.33367900  | -0.71348500 |
| H | 2.48312300  | 5.19004200  | -0.57963900 |
| H | 0.86104000  | 4.71378100  | -1.12879600 |
| H | 2.51753000  | 3.21067100  | 0.98759400  |
| H | 3.53712200  | -0.24068800 | 0.15847000  |
| H | 0.40644900  | 0.06794500  | -1.12894500 |
| H | -0.81394300 | 0.59477100  | 0.01301100  |
| H | 1.28337000  | -4.35603200 | -1.15421900 |
| H | 1.50227300  | -2.89288500 | -2.14238600 |

|   |             |             |             |
|---|-------------|-------------|-------------|
| H | 3.55114700  | -2.32775300 | -0.76709300 |
| H | 4.02417900  | -3.59774100 | 1.29790000  |
| C | 1.02604600  | 4.57670700  | 1.68650800  |
| H | 2.72688500  | -4.19547400 | -2.19100500 |
| H | 4.23180800  | -4.61529200 | -0.16010100 |
| H | 2.90176400  | 1.05215700  | -3.34143100 |
| H | 1.48670300  | 1.60512100  | -2.40308800 |
| H | 4.32374300  | 0.58827600  | -1.21662400 |
| C | -1.06013900 | -1.35698500 | 3.24713900  |
| H | 2.26060000  | 3.65015200  | -1.44661300 |
| H | 0.86897600  | 4.02413800  | 2.62284200  |
| H | 1.73324100  | 5.39583700  | 1.88125300  |
| H | 0.06752700  | 5.01199100  | 1.36382800  |
| H | -0.89497300 | -1.80363300 | 4.23867400  |
| H | -1.91314300 | -1.88505000 | 2.78593900  |
| H | 1.07506400  | -1.18163300 | 2.93806100  |
| H | 0.37015300  | -2.64217700 | 2.24507600  |
| H | -0.54545900 | 0.66081000  | 3.82045700  |
| H | -2.28139300 | 0.29605200  | 3.97183300  |
| H | -1.84499100 | 1.72618700  | 1.93436700  |
| H | -2.48754100 | 0.12825400  | 1.50237900  |
| C | -2.47360200 | 1.17082200  | -2.20463800 |
| H | -3.08470100 | 2.07963000  | -2.23138100 |
| C | -1.52122900 | 0.96151500  | -3.30898200 |
| H | -1.22964200 | -0.06520100 | -3.55565200 |
| H | -1.46069200 | 1.69012800  | -4.12300600 |
| O | -1.08111500 | 1.42478200  | -2.05027500 |
| C | -3.05147000 | 0.04725600  | -1.41080100 |
| C | -4.33329600 | 0.17924400  | -0.87044400 |
| C | -2.31968000 | -1.12062700 | -1.16650400 |
| C | -4.88076100 | -0.84283700 | -0.09596300 |
| H | -4.90310100 | 1.09365300  | -1.05032300 |
| C | -2.85955800 | -2.13359000 | -0.37942000 |
| H | -1.30168500 | -1.22778500 | -1.55085500 |
| C | -4.14302800 | -1.99877800 | 0.15382300  |
| H | -5.88135300 | -0.72964900 | 0.32383300  |
| H | -2.26526200 | -3.02451400 | -0.17097700 |
| H | -4.56372700 | -2.79261100 | 0.77279100  |

**G10-IM1**

|   |             |             |             |
|---|-------------|-------------|-------------|
| H | -1.84945000 | -3.24808700 | -3.38608600 |
| H | -2.43606100 | -0.22108800 | 0.10867000  |
| H | -1.68408300 | 0.27285500  | 2.34735400  |
| H | -1.12793200 | 2.42525600  | -0.70713400 |

|   |             |             |             |
|---|-------------|-------------|-------------|
| H | 1.57645800  | 2.29123200  | 0.84374400  |
| O | 1.88994000  | 2.17504200  | -2.29687500 |
| N | -0.59259400 | -1.32287000 | -2.01747600 |
| N | -0.32013000 | -0.16603900 | 0.06024900  |
| N | 1.51002900  | -0.62191100 | -1.38066600 |
| N | 1.60278500  | 2.65880400  | -0.10371400 |
| C | 0.11239600  | -0.71522000 | -1.14522600 |
| C | 1.92785400  | -0.99061100 | -2.73297300 |
| C | 3.80186700  | 0.19623700  | -0.86857600 |
| C | 2.28856100  | 0.40245100  | -0.70263000 |
| C | 1.90112100  | 1.81957300  | -1.13110100 |
| C | 1.22832000  | 4.04316100  | -0.34788800 |
| C | -1.97764300 | -1.72555200 | -1.84765200 |
| C | -2.44910500 | -2.35249700 | -3.15669600 |
| C | -2.15198500 | -2.71079900 | -0.69033600 |
| C | -1.62238600 | 0.50895400  | 0.19362500  |
| C | -1.83060300 | 1.58845800  | -0.86310500 |
| C | -1.73315600 | 1.07713700  | 1.59866000  |
| C | 4.21198700  | -0.04926800 | -2.31319100 |
| C | 0.45716100  | 4.57944600  | 0.84921300  |
| H | 0.17938000  | 5.62978700  | 0.68522200  |
| H | 1.07545300  | 4.53131400  | 1.76066100  |
| H | 0.57459600  | 4.03590800  | -1.23544900 |
| H | -1.65936400 | 1.18576400  | -1.87282100 |
| H | 0.38945700  | 0.32516800  | 0.58715000  |
| H | 2.12241600  | 0.31916800  | 0.37532100  |
| H | -1.59677100 | -3.63952800 | -0.90419100 |
| H | -1.77320200 | -2.28935600 | 0.25210800  |
| H | -2.64201000 | -0.86463000 | -1.65817700 |
| H | -2.32158900 | -1.63920000 | -3.98349600 |
| C | 2.45846600  | 4.88768900  | -0.67549100 |
| H | -3.21752600 | -2.93797200 | -0.54305600 |
| H | -3.51006300 | -2.63504000 | -3.09161100 |
| H | -2.71648200 | 1.55529500  | 1.70630100  |
| H | -0.93075000 | 1.81079200  | 1.80053800  |
| H | -2.86677400 | 1.95302800  | -0.80289700 |
| C | 3.42395700  | -1.24759400 | -2.82481700 |
| H | -0.46266900 | 4.00272500  | 1.02117800  |
| H | 2.97930500  | 4.45586100  | -1.54055300 |
| H | 2.16952600  | 5.92079500  | -0.91953600 |
| H | 3.14654300  | 4.90967500  | 0.18411000  |
| H | 3.67714100  | -1.47458700 | -3.87182000 |
| H | 3.68235200  | -2.13628800 | -2.22189200 |
| H | 1.63845400  | -0.19424000 | -3.44319300 |

|   |             |             |             |
|---|-------------|-------------|-------------|
| H | 1.35505100  | -1.88139700 | -3.00805600 |
| H | 3.97659500  | 0.83679900  | -2.92364700 |
| H | 5.29716500  | -0.22709900 | -2.37396600 |
| H | 4.31151200  | 1.07373800  | -0.43899500 |
| H | 4.08494600  | -0.67860800 | -0.25799700 |
| C | 2.34119700  | -0.10554000 | 3.19751700  |
| H | 3.05223200  | 0.38517600  | 3.87190100  |
| C | 0.90519300  | 0.03893600  | 3.49477300  |
| H | 0.21473300  | -0.73311000 | 3.14038400  |
| H | 0.58444900  | 0.60230600  | 4.37641900  |
| O | 1.51680800  | 0.80606900  | 2.48187200  |
| C | 2.89464200  | -1.27016600 | 2.44468000  |
| C | 4.22717500  | -1.64352600 | 2.64060500  |
| C | 2.11213300  | -1.97854600 | 1.52512600  |
| C | 4.77285400  | -2.71301700 | 1.93166300  |
| H | 4.84428600  | -1.08525900 | 3.34861500  |
| C | 2.66166900  | -3.03555100 | 0.80521600  |
| H | 1.07892300  | -1.67988000 | 1.32672500  |
| C | 3.99091600  | -3.40905300 | 1.01055000  |
| H | 5.81516200  | -2.99438700 | 2.09057900  |
| H | 2.04391200  | -3.55341900 | 0.06983900  |
| H | 4.42060700  | -4.23666700 | 0.44363400  |
| I | -5.28049200 | -0.17034300 | 0.54912700  |

**G10-TS1**

|   |            |             |             |
|---|------------|-------------|-------------|
| H | 4.90354700 | -3.79683300 | -1.61033900 |
| H | 2.49616300 | -0.16331200 | -3.30941000 |
| H | 0.19640800 | 0.68013300  | -3.44839000 |
| H | 2.97970300 | 2.19366300  | -1.41695200 |
| H | 0.44372400 | 2.26523600  | 0.27445300  |
| O | 3.23147300 | 1.64630100  | 1.64200100  |
| N | 3.51656900 | -1.64841800 | -0.89492700 |
| N | 1.64483300 | -0.24378100 | -1.38849600 |
| N | 2.14565800 | -0.94697400 | 0.81128700  |
| N | 1.35424400 | 2.49419400  | 0.69079300  |
| C | 2.48285400 | -0.96625500 | -0.54746300 |
| C | 3.12787100 | -1.55514900 | 1.70595600  |
| C | 0.86679500 | -0.07412500 | 2.76616800  |
| C | 1.34695900 | 0.16002100  | 1.32796400  |
| C | 2.08885100 | 1.49374300  | 1.23326100  |
| C | 1.88805800 | 3.83844200  | 0.58074900  |
| C | 3.84265400 | -2.02433600 | -2.24834000 |
| C | 5.10287900 | -2.88853600 | -2.19937900 |
| C | 2.70772500 | -2.78962500 | -2.93755000 |

|   |             |             |             |
|---|-------------|-------------|-------------|
| C | 2.15571100  | 0.52650800  | -2.52085900 |
| C | 3.32720200  | 1.42381000  | -2.12316000 |
| C | 1.00913100  | 1.33941400  | -3.10971500 |
| C | 1.97359400  | -0.55452300 | 3.69274300  |
| C | 1.12279100  | 4.59428900  | -0.49702200 |
| H | 1.48698700  | 5.62828900  | -0.57801700 |
| H | 0.04845800  | 4.62399100  | -0.25624400 |
| H | 2.94717600  | 3.74063200  | 0.28626800  |
| H | 4.11501500  | 0.84116600  | -1.62379000 |
| H | 0.81104700  | 0.18609800  | -0.98028700 |
| H | 0.42664600  | 0.24323200  | 0.74499200  |
| H | 2.49628700  | -3.71040300 | -2.37136000 |
| H | 1.78269100  | -2.19724100 | -2.96815000 |
| H | 4.09666700  | -1.14151000 | -2.86882900 |
| H | 5.91491600  | -2.33889200 | -1.70343300 |
| C | 1.85128300  | 4.55299700  | 1.93093000  |
| H | 2.98521200  | -3.06975800 | -3.96580700 |
| H | 5.43067200  | -3.18285300 | -3.20871000 |
| H | 1.36412400  | 1.92684500  | -3.96871900 |
| H | 0.59091700  | 2.01693800  | -2.35046200 |
| H | 3.75646200  | 1.91983000  | -3.00722000 |
| C | 2.56073000  | -1.82416200 | 3.09108500  |
| H | 1.23661900  | 4.10628600  | -1.47585100 |
| H | 2.41095400  | 3.96355700  | 2.66976300  |
| H | 2.30738200  | 5.55221800  | 1.85956200  |
| H | 0.81155200  | 4.66428000  | 2.27537000  |
| H | 3.36337300  | -2.23562300 | 3.72261600  |
| H | 1.76882400  | -2.59029700 | 3.01888800  |
| H | 4.01302400  | -0.89719300 | 1.78151600  |
| H | 3.46439100  | -2.48331600 | 1.23290400  |
| H | 2.75791500  | 0.21536000  | 3.77275900  |
| H | 1.57248600  | -0.73951400 | 4.70160500  |
| H | 0.40807600  | 0.86247100  | 3.12021000  |
| H | 0.06765400  | -0.83198400 | 2.72818600  |
| C | -2.49733800 | 0.51604300  | -0.08155400 |
| H | -2.87911200 | 1.33558000  | 0.52345500  |
| C | -1.91611900 | 0.89102600  | -1.36683600 |
| H | -1.76679200 | 0.05138900  | -2.07231500 |
| H | -2.43943500 | 1.71714900  | -1.87747000 |
| O | -0.82325700 | 1.23755100  | -0.59759800 |
| C | -2.14558500 | -0.73651900 | 0.62562800  |
| C | -2.73136100 | -1.01022200 | 1.86874800  |
| C | -1.21626400 | -1.64517900 | 0.10285600  |
| C | -2.40665700 | -2.16820100 | 2.56792600  |

|   |             |             |             |
|---|-------------|-------------|-------------|
| H | -3.47668200 | -0.31596000 | 2.26212100  |
| C | -0.87603500 | -2.79523700 | 0.81221200  |
| H | -0.71766500 | -1.43223600 | -0.84452600 |
| C | -1.47410400 | -3.06537300 | 2.04297400  |
| H | -2.88202400 | -2.37049300 | 3.52939100  |
| H | -0.12635600 | -3.47404200 | 0.40181700  |
| H | -1.20842900 | -3.96832500 | 2.59596900  |
| I | -5.11326800 | 0.00219600  | -0.73179800 |

**G10-IM2**

|   |             |             |             |
|---|-------------|-------------|-------------|
| H | 4.89899500  | -3.74389200 | -1.36471500 |
| H | 2.52125500  | -0.24349600 | -3.25451100 |
| H | 0.19393800  | 0.46102800  | -3.55646000 |
| H | 2.80172300  | 2.23739200  | -1.48634700 |
| H | 0.31809200  | 2.25865100  | 0.18700700  |
| O | 3.05029100  | 1.79879600  | 1.75054100  |
| N | 3.49117700  | -1.56940300 | -0.80010600 |
| N | 1.58978900  | -0.22973500 | -1.36638500 |
| N | 2.09234600  | -0.83870800 | 0.86409500  |
| N | 1.20015700  | 2.55248400  | 0.66534900  |
| C | 2.43448200  | -0.89638000 | -0.49165100 |
| C | 3.07891200  | -1.38477100 | 1.79163000  |
| C | 0.71341300  | -0.02091000 | 2.76461200  |
| C | 1.23684000  | 0.24031800  | 1.34772000  |
| C | 1.93644300  | 1.60033100  | 1.27589900  |
| C | 1.71442300  | 3.89654100  | 0.50508600  |
| C | 3.84315600  | -2.01589000 | -2.12262500 |
| C | 5.10620100  | -2.86976100 | -2.00135100 |
| C | 2.72699100  | -2.82746000 | -2.79000200 |
| C | 2.10946400  | 0.47973100  | -2.53390200 |
| C | 3.21633300  | 1.46133800  | -2.14900800 |
| C | 0.95377300  | 1.18870100  | -3.23249900 |
| C | 1.80596100  | -0.44069200 | 3.73652500  |
| C | 0.95960700  | 4.58362300  | -0.62583200 |
| H | 1.31500600  | 5.61558000  | -0.76146800 |
| H | -0.11848000 | 4.61118000  | -0.40340400 |
| H | 2.78349800  | 3.81109800  | 0.24027700  |
| H | 4.02058700  | 0.94652600  | -1.60231000 |
| H | 0.74099300  | 0.23399900  | -1.00115100 |
| H | 0.33889600  | 0.30077200  | 0.72553600  |
| H | 2.51605100  | -3.71942600 | -2.17850100 |
| H | 1.79735900  | -2.24605100 | -2.86297500 |
| H | 4.10739700  | -1.17021100 | -2.78986800 |
| H | 5.90511300  | -2.28794800 | -1.52093500 |

|   |             |             |             |
|---|-------------|-------------|-------------|
| C | 1.63200800  | 4.67749000  | 1.81675700  |
| H | 3.02178500  | -3.15892100 | -3.79827700 |
| H | 5.45634800  | -3.21948600 | -2.98563500 |
| H | 1.32443100  | 1.72770500  | -4.11707300 |
| H | 0.45908500  | 1.88294600  | -2.53868100 |
| H | 3.64445100  | 1.94419000  | -3.04137300 |
| C | 2.48382700  | -1.67743700 | 3.16114800  |
| H | 1.08973600  | 4.03828400  | -1.57182100 |
| H | 2.18497000  | 4.13543300  | 2.59594100  |
| H | 2.06927800  | 5.68222300  | 1.70710500  |
| H | 0.58169200  | 4.78244000  | 2.13034200  |
| H | 3.28739900  | -2.04038200 | 3.82138900  |
| H | 1.73868800  | -2.48752500 | 3.06746800  |
| H | 3.92128700  | -0.67594200 | 1.89263200  |
| H | 3.48120700  | -2.29571300 | 1.33743400  |
| H | 2.54372500  | 0.37072800  | 3.84297100  |
| H | 1.37784100  | -0.64725900 | 4.73067100  |
| H | 0.18856400  | 0.88831100  | 3.09823200  |
| H | -0.03876900 | -0.82428900 | 2.69513500  |
| C | -2.78858300 | 0.34910900  | 0.02558200  |
| H | -2.95150300 | 1.06285000  | 0.84301800  |
| C | -1.99289700 | 1.02685200  | -1.10602000 |
| H | -2.03978900 | 0.34288100  | -1.99370100 |
| H | -2.58902000 | 1.92115500  | -1.40889600 |
| O | -0.74385700 | 1.29729900  | -0.68208900 |
| C | -2.23281200 | -0.93540500 | 0.56997900  |
| C | -2.69051900 | -1.43368900 | 1.79804500  |
| C | -1.23066500 | -1.64101600 | -0.10603500 |
| C | -2.16653800 | -2.60513000 | 2.33654100  |
| H | -3.47844600 | -0.89149000 | 2.32751900  |
| C | -0.68452900 | -2.80026700 | 0.44482600  |
| H | -0.83453500 | -1.25685100 | -1.04624900 |
| C | -1.15361100 | -3.29040300 | 1.66253500  |
| H | -2.53793300 | -2.97722800 | 3.29350300  |
| H | 0.12811300  | -3.30767700 | -0.07874300 |
| H | -0.72260100 | -4.19665200 | 2.09228100  |
| I | -4.87891100 | -0.00047300 | -0.67587600 |

**G10-TS2**

|   |             |             |             |
|---|-------------|-------------|-------------|
| H | 3.28851400  | -5.01451200 | -1.32760100 |
| H | 1.86982600  | -1.05472100 | -3.35887800 |
| H | -0.07529100 | 0.39194600  | -3.47841100 |
| H | 3.27776500  | 1.25742500  | -1.92680200 |
| H | 1.01450700  | 2.28475000  | 0.00335700  |

|   |            |             |             |
|---|------------|-------------|-------------|
| O | 3.74641200 | 1.17274300  | 1.14405400  |
| N | 2.76260100 | -2.45409700 | -0.86149200 |
| N | 1.31688600 | -0.61760300 | -1.37318500 |
| N | 1.97397000 | -1.13385100 | 0.84100500  |
| N | 2.02044500 | 2.30364300  | 0.19776600  |
| C | 2.04260300 | -1.43978000 | -0.52136200 |
| C | 2.91992900 | -1.84261100 | 1.69880600  |
| C | 1.23453900 | 0.27119800  | 2.75683700  |
| C | 1.53501400 | 0.19277500  | 1.25566400  |
| C | 2.55726500 | 1.25878200  | 0.86344700  |
| C | 2.82190300 | 3.45603600  | -0.16489400 |
| C | 2.72772800 | -3.09542200 | -2.15129800 |
| C | 3.65670100 | -4.30841800 | -2.08793200 |
| C | 1.31709800 | -3.53489700 | -2.55913000 |
| C | 1.85293800 | -0.19669800 | -2.66712000 |
| C | 3.27725400 | 0.34594900  | -2.54488000 |
| C | 0.90878700 | 0.83753800  | -3.27152400 |
| C | 2.34533300 | -0.31918700 | 3.61379000  |
| C | 2.24222200 | 4.12664800  | -1.40396400 |
| H | 2.85631800 | 4.99127500  | -1.69594600 |
| H | 1.22066800 | 4.48084200  | -1.20198900 |
| H | 3.82791800 | 3.06681100  | -0.39279800 |
| H | 3.93573600 | -0.38904900 | -2.05860000 |
| H | 0.69372200 | 0.09815900  | -0.96777300 |
| H | 0.58517400 | 0.43640900  | 0.76374500  |
| H | 0.92499100 | -4.23708300 | -1.80606700 |
| H | 0.62867600 | -2.67978100 | -2.61052500 |
| H | 3.13084900 | -2.43742600 | -2.94759600 |
| H | 4.66528400 | -3.99057000 | -1.78900700 |
| C | 2.94626900 | 4.42426900  | 1.01205600  |
| H | 1.32548400 | -4.04344000 | -3.53607200 |
| H | 3.71469000 | -4.82710500 | -3.05794700 |
| H | 1.32584900 | 1.22185300  | -4.21427300 |
| H | 0.74121800 | 1.66373300  | -2.56629600 |
| H | 3.68822300 | 0.58775300  | -3.53757500 |
| C | 2.55207500 | -1.76248800 | 3.17395600  |
| H | 2.20172000 | 3.42366000  | -2.24802700 |
| H | 3.38540300 | 3.89938300  | 1.87219000  |
| H | 3.59272300 | 5.27808300  | 0.75590600  |
| H | 1.95074100 | 4.79924300  | 1.29156800  |
| H | 3.35072500 | -2.24978500 | 3.75535600  |
| H | 1.62154000 | -2.32778800 | 3.35338300  |
| H | 3.93394100 | -1.42893500 | 1.54439400  |
| H | 2.94694300 | -2.88361800 | 1.35920800  |



|   |             |             |             |
|---|-------------|-------------|-------------|
| H | 3.27532500  | 0.25173100  | 3.46418300  |
| H | 2.07729900  | -0.26536100 | 4.68114500  |
| H | 1.03965200  | 1.32790900  | 2.99964000  |
| H | 0.29770800  | -0.28268200 | 2.93725300  |
| C | -1.39246600 | 3.57007700  | 0.11011500  |
| O | -0.41325900 | 3.89153200  | 0.65182200  |
| O | -2.45739500 | 3.48950100  | -0.34522000 |
| C | -2.64668100 | 0.37613600  | 0.12509500  |
| H | -2.97130000 | 1.25435900  | 0.69514400  |
| C | -1.76472300 | 0.81144700  | -1.05794400 |
| H | -1.57652100 | -0.10007700 | -1.67981100 |
| H | -2.40371800 | 1.46249900  | -1.69454700 |
| O | -0.62905100 | 1.41344200  | -0.62425500 |
| C | -2.11594600 | -0.68471800 | 1.04292200  |
| C | -2.55346100 | -0.73865400 | 2.37448300  |
| C | -1.20642100 | -1.65019900 | 0.59913400  |
| C | -2.11420000 | -1.74294200 | 3.23213100  |
| H | -3.26425700 | 0.01200800  | 2.72981600  |
| C | -0.75072600 | -2.64702000 | 1.46113600  |
| H | -0.82806100 | -1.61444500 | -0.42373100 |
| C | -1.21251700 | -2.70626300 | 2.77475600  |
| H | -2.47152700 | -1.77198700 | 4.26340600  |
| H | -0.01453200 | -3.36711600 | 1.09726300  |
| H | -0.85753800 | -3.48969300 | 3.44728400  |
| I | -4.59434800 | -0.34280000 | -0.69282100 |

### G10-IM3

|   |             |             |             |
|---|-------------|-------------|-------------|
| H | -3.98876700 | 5.03654500  | 0.17003200  |
| H | -2.03217600 | 1.95919800  | -2.85040000 |
| H | -0.01002800 | 0.52313800  | -3.08293400 |
| H | -3.41986800 | -0.70574400 | -2.26697700 |
| H | -1.48530700 | -2.64701200 | -0.22217900 |
| O | -4.19430700 | -1.09785800 | 0.38519100  |
| N | -3.17032900 | 2.52145100  | -0.03228700 |
| N | -1.59977500 | 1.01276900  | -1.01871400 |
| N | -2.29186200 | 0.80323700  | 1.22146200  |
| N | -2.50137100 | -2.43426700 | -0.33331500 |
| C | -2.38489300 | 1.50159200  | 0.00887400  |
| C | -3.25453300 | 1.22249500  | 2.23833400  |
| C | -1.74910400 | -1.25137400 | 2.53036600  |
| C | -1.94840900 | -0.61378500 | 1.15064000  |
| C | -3.00662100 | -1.39802700 | 0.36062100  |
| C | -3.35393500 | -3.35161900 | -1.05866300 |
| C | -3.18760900 | 3.48531100  | -1.10499300 |

|   |             |             |             |
|---|-------------|-------------|-------------|
| C | -4.25130700 | 4.53072900  | -0.77199700 |
| C | -1.82791100 | 4.16041700  | -1.31435400 |
| C | -2.03479900 | 0.94613900  | -2.40910600 |
| C | -3.43956900 | 0.35984000  | -2.54321100 |
| C | -1.02404500 | 0.11166300  | -3.18607200 |
| C | -2.89260800 | -0.93036600 | 3.48118400  |
| C | -2.52663100 | -4.02479000 | -2.14705700 |
| H | -3.12726800 | -4.75970100 | -2.70290200 |
| H | -1.66427100 | -4.54089100 | -1.69672100 |
| H | -4.16015900 | -2.75179300 | -1.51339000 |
| H | -4.14950000 | 0.86027200  | -1.86895800 |
| H | -0.84571600 | 0.36235500  | -0.79134700 |
| H | -0.98673200 | -0.73184000 | 0.63964200  |
| H | -1.54808700 | 4.71071400  | -0.40118400 |
| H | -1.04707100 | 3.41348400  | -1.51649800 |
| H | -3.49191300 | 3.02347400  | -2.06516600 |
| H | -5.22397300 | 4.04015800  | -0.62772000 |
| C | -4.00284800 | -4.36479800 | -0.11459800 |
| H | -1.86391300 | 4.87621500  | -2.15088300 |
| H | -4.34365500 | 5.28568200  | -1.56875700 |
| H | -1.30055700 | 0.08264700  | -4.25032400 |
| H | -0.99234700 | -0.90990100 | -2.78123600 |
| H | -3.79803400 | 0.45325100  | -3.58036600 |
| C | -2.99045200 | 0.58544600  | 3.59580100  |
| H | -2.13713800 | -3.27818100 | -2.85416600 |
| H | -4.58394400 | -3.83217500 | 0.65122800  |
| H | -4.67817900 | -5.04175800 | -0.66067600 |
| H | -3.22700100 | -4.96726600 | 0.38289300  |
| H | -3.79782300 | 0.88697700  | 4.28116000  |
| H | -2.04662600 | 0.97658500  | 4.01647500  |
| H | -4.27553500 | 0.97395200  | 1.89908900  |
| H | -3.20546800 | 2.31555600  | 2.30530200  |
| H | -3.83808700 | -1.32943900 | 3.07732700  |
| H | -2.72366000 | -1.39592800 | 4.46500100  |
| H | -1.60603200 | -2.33058900 | 2.37565200  |
| H | -0.80502700 | -0.86777900 | 2.95277300  |
| C | 0.91022100  | -2.07366700 | -0.31042400 |
| O | 0.13778600  | -2.91243000 | 0.17432600  |
| O | 0.66988400  | -1.01992000 | -0.91398100 |
| I | 5.68732400  | 0.17649600  | -0.08991900 |
| C | 3.25233300  | -1.58121300 | -0.63395600 |
| C | 3.69233400  | -0.57980000 | 0.44340600  |
| O | 2.25830400  | -2.41148300 | -0.11077500 |
| H | 2.89780700  | -1.03720500 | -1.52268800 |

|   |             |             |             |
|---|-------------|-------------|-------------|
| H | 4.10298500  | -2.22397700 | -0.90395400 |
| C | 2.70807800  | 0.52887700  | 0.66785900  |
| C | 2.49883500  | 1.52594600  | -0.29125200 |
| C | 1.86903500  | 0.47522700  | 1.78344900  |
| C | 1.46216500  | 2.43896400  | -0.14668500 |
| H | 3.15029800  | 1.57319900  | -1.16706100 |
| C | 0.82130200  | 1.38654300  | 1.92303100  |
| H | 2.01231900  | -0.31198800 | 2.52785200  |
| C | 0.61004600  | 2.36499700  | 0.95650300  |
| H | 1.29951000  | 3.20172900  | -0.91055900 |
| H | 0.14320500  | 1.31801300  | 2.77451800  |
| H | -0.23749000 | 3.04735800  | 1.04672700  |
| H | 3.88264200  | -1.12891800 | 1.37275100  |

**G10-TS3**

|   |             |             |             |
|---|-------------|-------------|-------------|
| H | -3.92260400 | 4.90154600  | -0.46789800 |
| H | -1.66550400 | 1.48838700  | -2.94805200 |
| H | 0.33247200  | -0.03133300 | -2.81374700 |
| H | -3.13022100 | -1.02047000 | -1.97776900 |
| H | -1.51442600 | -2.57088000 | -0.10171700 |
| O | -4.06564600 | -1.04254800 | 1.03784300  |
| N | -2.95311200 | 2.44108900  | -0.25640300 |
| N | -1.30581000 | 0.86507100  | -0.97103000 |
| N | -2.02925700 | 0.96970700  | 1.26013300  |
| N | -2.50063600 | -2.38628200 | 0.10831500  |
| C | -2.12972600 | 1.47828200  | -0.04436000 |
| C | -2.93382700 | 1.59393500  | 2.22440700  |
| C | -1.50785100 | -0.85113800 | 2.87304400  |
| C | -1.75559500 | -0.45943100 | 1.41040000  |
| C | -2.88958500 | -1.31005400 | 0.83120200  |
| C | -3.49443300 | -3.29238000 | -0.44687500 |
| C | -2.99080500 | 3.22730900  | -1.46762600 |
| C | -4.12463400 | 4.24218300  | -1.32586900 |
| C | -1.66924500 | 3.94475900  | -1.75196900 |
| C | -1.70346700 | 0.56479200  | -2.34142300 |
| C | -3.11632200 | -0.01576000 | -2.42560400 |
| C | -0.69319300 | -0.41415000 | -2.92869700 |
| C | -2.57173700 | -0.30939300 | 3.81706400  |
| C | -2.89522700 | -4.05633600 | -1.61973200 |
| H | -3.64529400 | -4.73555700 | -2.05053800 |
| H | -2.02020000 | -4.63962600 | -1.29999500 |
| H | -4.32864700 | -2.66186300 | -0.79822300 |
| H | -3.84146600 | 0.60191600  | -1.87733100 |
| H | -0.54033600 | 0.29767000  | -0.61441000 |

|   |             |             |             |
|---|-------------|-------------|-------------|
| H | -0.83351500 | -0.71707400 | 0.88104800  |
| H | -1.44316200 | 4.63493400  | -0.92370400 |
| H | -0.83808800 | 3.23039700  | -1.83001200 |
| H | -3.23361400 | 2.60494600  | -2.35068600 |
| H | -5.07310700 | 3.72206800  | -1.13259000 |
| C | -4.04344400 | -4.22370500 | 0.63345500  |
| H | -1.73194300 | 4.52858900  | -2.68397900 |
| H | -4.22986100 | 4.85866100  | -2.23228600 |
| H | -0.89435900 | -0.57052900 | -3.99790700 |
| H | -0.76438900 | -1.38547800 | -2.41553300 |
| H | -3.43479800 | -0.09223600 | -3.47667500 |
| C | -2.61008700 | 1.20479500  | 3.65930700  |
| H | -2.55038300 | -3.36673600 | -2.40411800 |
| H | -4.46381300 | -3.62636800 | 1.45412000  |
| H | -4.83708500 | -4.86963300 | 0.22801600  |
| H | -3.23931200 | -4.86383100 | 1.02786400  |
| H | -3.36385700 | 1.65737700  | 4.32182400  |
| H | -1.62967000 | 1.62418800  | 3.94716900  |
| H | -3.97663300 | 1.32455400  | 1.98391900  |
| H | -2.85192500 | 2.67842500  | 2.08678400  |
| H | -3.55359800 | -0.73247300 | 3.55159100  |
| H | -2.34584800 | -0.59754800 | 4.85571100  |
| H | -1.43353000 | -1.94846800 | 2.91925400  |
| H | -0.52531600 | -0.44654200 | 3.16980200  |
| C | 0.94055800  | -2.46910400 | -0.87967100 |
| O | 0.09315300  | -3.33342200 | -1.01551900 |
| O | 0.82630800  | -1.35866800 | -0.26364500 |
| I | 5.28704600  | -0.08154000 | 0.48195800  |
| C | 2.98458300  | -1.48731300 | -1.35380800 |
| C | 2.71318900  | -0.71900000 | -0.06701000 |
| O | 2.17737000  | -2.64920700 | -1.42248500 |
| H | 2.77369300  | -0.83717900 | -2.21818600 |
| H | 4.02098600  | -1.82514500 | -1.40395700 |
| C | 2.24004100  | 0.68358700  | 0.01368300  |
| C | 2.34869000  | 1.58346400  | -1.05156400 |
| C | 1.56575100  | 1.08111800  | 1.17352200  |
| C | 1.80081800  | 2.85863700  | -0.94841400 |
| H | 2.89782300  | 1.30074400  | -1.95106400 |
| C | 1.00851400  | 2.35176300  | 1.27155200  |
| H | 1.46251500  | 0.36886000  | 1.99477800  |
| C | 1.12898600  | 3.24759500  | 0.21084200  |
| H | 1.89556400  | 3.55616100  | -1.78266800 |
| H | 0.45836800  | 2.63369500  | 2.17045700  |
| H | 0.68971300  | 4.24325400  | 0.28247200  |

|   |            |             |            |
|---|------------|-------------|------------|
| H | 2.77242000 | -1.27881500 | 0.86265800 |
|---|------------|-------------|------------|

**G10-IM4**

|   |             |             |             |
|---|-------------|-------------|-------------|
| H | -4.34331800 | 4.86806700  | -0.05192000 |
| H | -1.99794200 | 1.73210700  | -2.92887400 |
| H | 0.05201300  | 0.31196700  | -2.88211900 |
| H | -3.39585600 | -0.88421500 | -2.16086600 |
| H | -1.94358700 | -2.66856900 | -0.28566000 |
| O | -4.45366900 | -1.09232200 | 0.80870300  |
| N | -3.34249300 | 2.41051000  | -0.08492300 |
| N | -1.67373800 | 0.96608600  | -0.99151900 |
| N | -2.34856500 | 0.79247500  | 1.23871800  |
| N | -2.93481600 | -2.48206900 | -0.13742100 |
| C | -2.50424300 | 1.44716500  | 0.00606800  |
| C | -3.18554500 | 1.31195500  | 2.32021000  |
| C | -1.75535700 | -1.21063800 | 2.59297700  |
| C | -2.10697800 | -0.64819100 | 1.21026400  |
| C | -3.29329500 | -1.41228600 | 0.61115000  |
| C | -3.92724500 | -3.32326500 | -0.78211700 |
| C | -3.34351400 | 3.33573100  | -1.19941400 |
| C | -4.49649300 | 4.31459500  | -0.99082100 |
| C | -2.01460000 | 4.08631200  | -1.32248200 |
| C | -2.01924100 | 0.76579700  | -2.38936200 |
| C | -3.40786900 | 0.14808200  | -2.54237800 |
| C | -0.94810000 | -0.13403300 | -2.99522800 |
| C | -2.73615800 | -0.75483400 | 3.66475400  |
| C | -3.27293400 | -4.04990100 | -1.94961700 |
| H | -4.00227900 | -4.69040300 | -2.46473400 |
| H | -2.44661200 | -4.68528700 | -1.59414000 |
| H | -4.71360700 | -2.64734400 | -1.15888400 |
| H | -4.16097900 | 0.70651100  | -1.96801900 |
| H | -0.79799500 | 0.56168700  | -0.68498500 |
| H | -1.24283500 | -0.85739400 | 0.57007200  |
| H | -1.82227500 | 4.64365700  | -0.39168600 |
| H | -1.17488200 | 3.39433900  | -1.47946600 |
| H | -3.53257300 | 2.81619200  | -2.15873600 |
| H | -5.44538100 | 3.76714900  | -0.90504500 |
| C | -4.57405800 | -4.28056700 | 0.21678100  |
| H | -2.04479300 | 4.80418800  | -2.15657400 |
| H | -4.57049500 | 5.03401700  | -1.82056200 |
| H | -1.13369600 | -0.29304700 | -4.06644700 |
| H | -0.94706300 | -1.11335100 | -2.48956900 |
| H | -3.70581400 | 0.13264700  | -3.60152900 |
| C | -2.75899700 | 0.76886700  | 3.67553700  |

|   |             |             |             |
|---|-------------|-------------|-------------|
| H | -2.85927500 | -3.33494200 | -2.67585300 |
| H | -5.02197600 | -3.70469300 | 1.03792300  |
| H | -5.36415900 | -4.87465300 | -0.26653100 |
| H | -3.82073500 | -4.96872100 | 0.63029500  |
| H | -3.45114200 | 1.15178700  | 4.44066200  |
| H | -1.75181700 | 1.14597400  | 3.92471500  |
| H | -4.24260800 | 1.06718300  | 2.12107700  |
| H | -3.10590600 | 2.40518100  | 2.29101800  |
| H | -3.74477300 | -1.13538300 | 3.43337200  |
| H | -2.44197500 | -1.15670600 | 4.64623100  |
| H | -1.71146600 | -2.30693000 | 2.50886600  |
| H | -0.73954600 | -0.87249200 | 2.85686500  |
| C | 0.98609900  | -2.04222600 | -0.50732700 |
| O | -0.05194100 | -2.63721800 | -0.61853700 |
| O | 1.42580800  | -1.51026400 | 0.63495700  |
| I | 6.20355800  | -0.35124900 | 0.13880800  |
| C | 3.04296500  | -1.23215100 | -0.97969900 |
| C | 2.57808700  | -0.67833200 | 0.37179900  |
| O | 1.83211900  | -1.81637100 | -1.50071400 |
| H | 3.40474400  | -0.46849200 | -1.67310400 |
| H | 3.81159600  | -2.00593400 | -0.86432200 |
| C | 2.16265800  | 0.77848200  | 0.36128300  |
| C | 3.00299500  | 1.74039900  | -0.21362200 |
| C | 0.96545100  | 1.18462100  | 0.95647100  |
| C | 2.62311800  | 3.08088000  | -0.21608400 |
| H | 3.97183500  | 1.43131500  | -0.61816300 |
| C | 0.58202700  | 2.52648500  | 0.94025800  |
| H | 0.31371100  | 0.45178300  | 1.43214700  |
| C | 1.40989700  | 3.47768000  | 0.34987500  |
| H | 3.28750500  | 3.82202900  | -0.66369200 |
| H | -0.37492900 | 2.81139700  | 1.38415400  |
| H | 1.11084600  | 4.52755400  | 0.33084900  |
| H | 3.33821200  | -0.86534700 | 1.14150700  |

**I (M06)**

|   |            |            |            |
|---|------------|------------|------------|
| I | 0.31335200 | 0.19073600 | 0.00000000 |
|---|------------|------------|------------|

**CO<sub>2</sub> (M06)**

|   |            |            |             |
|---|------------|------------|-------------|
| C | 0.00000000 | 0.00000000 | 0.00000000  |
| O | 0.00000000 | 0.00000000 | 1.15849400  |
| O | 0.00000000 | 0.00000000 | -1.15849400 |

**R1 (M06)**

|   |            |             |            |
|---|------------|-------------|------------|
| C | 2.56817500 | -0.03865100 | 0.73377800 |
|---|------------|-------------|------------|

|   |             |             |             |
|---|-------------|-------------|-------------|
| H | 3.48544800  | -0.59976900 | 0.96266600  |
| C | 1.60164900  | -0.57037000 | -0.23239000 |
| H | 1.84020200  | -1.53374600 | -0.71094000 |
| O | 2.47031000  | 0.48466600  | -0.56287900 |
| C | 0.15216500  | -0.26099200 | -0.13236600 |
| C | -0.29550800 | 1.06217400  | -0.08655500 |
| C | -0.77893000 | -1.30043600 | -0.06695600 |
| C | -1.65444200 | 1.33787700  | 0.03473100  |
| H | 0.43890300  | 1.86982600  | -0.16575400 |
| C | -2.13766900 | -1.02388800 | 0.05785100  |
| H | -0.43224500 | -2.33873100 | -0.11745000 |
| C | -2.57884500 | 0.29693900  | 0.11043000  |
| H | -1.99660800 | 2.37667200  | 0.06429700  |
| H | -2.85867000 | -1.84499100 | 0.10917700  |
| H | -3.64653500 | 0.51574000  | 0.20345800  |
| H | 2.19696500  | 0.60962900  | 1.54164200  |

#### G10-Cu

|   |             |             |             |
|---|-------------|-------------|-------------|
| H | 1.44718300  | -4.35567300 | 1.23627100  |
| H | 4.64035100  | 0.99703200  | -0.01371500 |
| H | 3.46202600  | -0.05406300 | 1.93960300  |
| H | 5.77905200  | -1.80902400 | -0.48351300 |
| H | -1.78330100 | 1.91956200  | 1.30558500  |
| H | 1.67605600  | 2.42909200  | -1.62211600 |
| H | 0.05648900  | 2.82770300  | 2.14552200  |
| O | -0.44260400 | 1.56448000  | -1.51023600 |
| N | 1.24963900  | -1.27343100 | -0.19053500 |
| N | 3.41734400  | -0.53600900 | -0.76591400 |
| N | 1.80793800  | 0.99439300  | -0.10653500 |
| N | -1.68332900 | 2.09400100  | 0.30979300  |
| C | 2.11582700  | -0.31394000 | -0.36134200 |
| C | 2.41066700  | 2.09493500  | -0.86747700 |
| C | 0.95432700  | 2.52728600  | 1.58244200  |
| C | 0.62244800  | 1.35981900  | 0.64764900  |
| C | -0.55518500 | 1.66344800  | -0.30098400 |
| C | -2.90201000 | 2.38346600  | -0.44770100 |
| C | 1.66438900  | -2.67724800 | -0.12206300 |
| C | 1.08971600  | -3.31842900 | 1.13047200  |
| C | 1.23108900  | -3.41363300 | -1.37899900 |
| C | 4.55768800  | -0.10407300 | 0.05500100  |
| C | 5.81422300  | -0.70561200 | -0.53887300 |
| C | 4.38704400  | -0.48189000 | 1.51769500  |
| C | 1.54701500  | 3.70355500  | 0.82569200  |
| C | -4.07711100 | 2.39347900  | 0.50562700  |

|    |             |             |             |
|----|-------------|-------------|-------------|
| H  | -5.01081300 | 2.60536100  | -0.03699700 |
| H  | -3.95251400 | 3.17694400  | 1.27531800  |
| H  | -3.03473700 | 1.56074800  | -1.17728100 |
| H  | 1.68516100  | 2.16258200  | 2.32845600  |
| H  | 3.27699100  | 1.71101600  | -1.41955500 |
| H  | 5.93615700  | -0.41829300 | -1.59481100 |
| H  | 3.55298900  | -1.45559800 | -1.17429700 |
| H  | 0.32848500  | 0.48897300  | 1.26475300  |
| H  | 1.65684300  | -2.95245400 | -2.28573400 |
| H  | 1.53992500  | -4.47095100 | -1.34613100 |
| H  | 2.76891500  | -2.74410900 | -0.03760900 |
| H  | -0.01404300 | -3.33880000 | 1.09004700  |
| C  | -2.75596800 | 3.69689000  | -1.19522300 |
| H  | 0.13090900  | -3.38244400 | -1.47535300 |
| H  | 1.38571000  | -2.75470600 | 2.03051800  |
| H  | 5.23145200  | -0.11197400 | 2.12105000  |
| H  | 4.34101300  | -1.57887300 | 1.63752900  |
| H  | 6.70667800  | -0.37704800 | 0.01449700  |
| C  | 2.77136000  | 3.25026100  | 0.04627000  |
| H  | 3.56310600  | 2.93527200  | 0.75503100  |
| H  | 3.18827700  | 4.07563200  | -0.55435100 |
| H  | 1.79893700  | 4.52104900  | 1.52094300  |
| H  | 0.79165100  | 4.11319200  | 0.12564800  |
| H  | -4.18912200 | 1.41487300  | 1.00094900  |
| H  | -1.89333300 | 3.66524200  | -1.87703000 |
| H  | -3.65663200 | 3.90478700  | -1.79494800 |
| H  | -2.61556000 | 4.53103800  | -0.48527600 |
| Cu | -0.68752800 | -1.16579300 | -0.14433400 |
| I  | -3.05866800 | -1.49521700 | 0.19882600  |

### **G10-Cu-IM1**

|   |             |             |             |
|---|-------------|-------------|-------------|
| H | 0.92030000  | -3.46116500 | 3.01909100  |
| H | 2.44133700  | 1.75852100  | 2.72679300  |
| H | 2.68088400  | -0.56197200 | 3.57453800  |
| H | 4.78727000  | 1.07137000  | 0.87070900  |
| H | -2.95991600 | 0.31981700  | -0.06436700 |
| H | 0.18847200  | 3.39793200  | 0.31921600  |
| H | -2.61328200 | 2.32826500  | 3.07190400  |
| O | -2.12591700 | 3.36581400  | 0.17642000  |
| N | 0.25757100  | -0.82280700 | 0.98182200  |
| N | 2.20733900  | 0.47572600  | 1.09987300  |
| N | 0.10706300  | 1.50786500  | 1.21077700  |
| N | -2.89169200 | 1.30732300  | -0.32882300 |
| C | 0.84319600  | 0.34160100  | 1.11778100  |



|    |             |             |             |
|----|-------------|-------------|-------------|
| C  | 0.70301500  | 2.83953500  | 1.11932200  |
| C  | -1.53140900 | 2.27463200  | 2.85602200  |
| C  | -1.31862300 | 1.52868700  | 1.53617500  |
| C  | -2.14310400 | 2.16125400  | 0.40120600  |
| C  | -3.72275500 | 1.75577200  | -1.43524400 |
| C  | 0.96030400  | -2.05969500 | 1.35344200  |
| C  | 0.40443800  | -2.54522300 | 2.68492800  |
| C  | 0.81362000  | -3.12402000 | 0.27979300  |
| C  | 3.05195000  | 1.04446900  | 2.14846100  |
| C  | 4.22689000  | 1.77141500  | 1.51649100  |
| C  | 3.53127300  | -0.04451600 | 3.09916400  |
| C  | -0.90146100 | 3.66177200  | 2.87419400  |
| C  | -3.81986000 | 0.65813600  | -2.47821300 |
| H  | -4.38591100 | 1.00745200  | -3.35675400 |
| H  | -4.33222300 | -0.22921300 | -2.06687100 |
| H  | -3.20867200 | 2.63737600  | -1.86244600 |
| H  | -1.07852000 | 1.64900200  | 3.64981300  |
| H  | 1.74766400  | 2.73841400  | 0.80235500  |
| H  | 3.89360400  | 2.61287500  | 0.88716800  |
| H  | 2.70056500  | -0.26878600 | 0.57982100  |
| H  | -1.64289800 | 0.48223900  | 1.66614700  |
| H  | 1.26428600  | -2.79649900 | -0.67040700 |
| H  | 1.34536200  | -4.04106600 | 0.58268000  |
| H  | 2.04375200  | -1.87559900 | 1.47294900  |
| H  | -0.67477400 | -2.76627400 | 2.59413700  |
| C  | -5.09010300 | 2.19497300  | -0.93575900 |
| H  | -0.24995300 | -3.38555900 | 0.11251800  |
| H  | 0.52350300  | -1.77465500 | 3.46644900  |
| H  | 4.16539300  | 0.37722900  | 3.89730000  |
| H  | 4.12530500  | -0.79299500 | 2.54508800  |
| H  | 4.91185700  | 2.16304700  | 2.28664200  |
| C  | 0.55422100  | 3.59861900  | 2.43107300  |
| H  | 1.15286800  | 3.10267300  | 3.21969800  |
| H  | 0.97032900  | 4.61448700  | 2.31407400  |
| H  | -0.97605500 | 4.09366000  | 3.88799400  |
| H  | -1.46280500 | 4.32121300  | 2.19380800  |
| H  | -2.82026900 | 0.32877100  | -2.80490000 |
| H  | -4.98920800 | 3.00730600  | -0.19903000 |
| H  | -5.71967000 | 2.55662000  | -1.76599800 |
| H  | -5.60836100 | 1.34678700  | -0.45501600 |
| Cu | -1.49412500 | -1.35089000 | 0.29643500  |
| I  | -3.75007200 | -2.34088200 | 0.25901300  |
| O  | -0.63241900 | -0.72389400 | -1.87809300 |
| C  | 0.69848000  | -0.33515100 | -2.18128400 |

|   |             |             |             |
|---|-------------|-------------|-------------|
| C | -0.15392000 | -1.00274700 | -3.17056100 |
| H | 1.49055900  | -0.94037100 | -1.70764800 |
| H | 0.01077400  | -2.06483800 | -3.39867900 |
| H | -0.60483900 | -0.40498300 | -3.97782000 |
| C | 0.97818500  | 1.12213800  | -2.22852300 |
| C | 2.30225100  | 1.56679700  | -2.15177900 |
| C | -0.05799500 | 2.05414300  | -2.33581400 |
| C | 2.57984600  | 2.93073500  | -2.21471200 |
| H | 3.10919100  | 0.83142400  | -2.02276100 |
| C | 0.22299800  | 3.41658200  | -2.38896600 |
| H | -1.09383900 | 1.70043900  | -2.34274400 |
| C | 1.54505800  | 3.85763000  | -2.33745100 |
| H | 3.61880200  | 3.27074800  | -2.15476800 |
| H | -0.60017700 | 4.13572100  | -2.44470900 |
| H | 1.76750600  | 4.92891900  | -2.37534200 |
| I | 4.40549100  | -1.67156800 | -0.80916200 |

#### G10-Cu-TS1

|   |             |             |             |
|---|-------------|-------------|-------------|
| H | -1.82354300 | -4.68756700 | -1.76276600 |
| H | 3.08382000  | -2.92432900 | 1.49728800  |
| H | 0.92588300  | -4.25054600 | 1.62819800  |
| H | 3.43768800  | -4.33324700 | -1.19259200 |
| H | -2.36514100 | 0.60379500  | 0.84782800  |
| H | 1.71272500  | 0.22529200  | 2.44736400  |
| H | -1.65251700 | -1.50935400 | 3.89451300  |
| O | -0.27530300 | 1.16379700  | 3.16589500  |
| N | -0.34582300 | -1.84687000 | -0.64728700 |
| N | 1.86773400  | -2.43489100 | -0.15613600 |
| N | 0.60127800  | -1.18602800 | 1.37977400  |
| N | -1.79400200 | 1.16292600  | 1.49263500  |
| C | 0.66919800  | -1.84366300 | 0.17111900  |
| C | 1.77450900  | -0.84451000 | 2.18317600  |
| C | -0.71805600 | -1.73921800 | 3.35278000  |
| C | -0.68153100 | -0.94158800 | 2.04614500  |
| C | -0.89742800 | 0.56059500  | 2.29557000  |
| C | -2.12207000 | 2.57905900  | 1.59187300  |
| C | -0.51370600 | -2.95087700 | -1.58938400 |
| C | -1.65169300 | -3.83041100 | -1.08912000 |
| C | -0.78583600 | -2.44566500 | -2.99573000 |
| C | 2.65047300  | -3.40131100 | 0.59651500  |
| C | 3.80985500  | -3.83349700 | -0.27913100 |
| C | 1.79939200  | -4.58105700 | 1.04006400  |
| C | 0.49715000  | -1.50426800 | 4.24472800  |
| C | -2.35807600 | 3.15364000  | 0.20826200  |

|    |             |             |             |
|----|-------------|-------------|-------------|
| H  | -2.54522500 | 4.23834000  | 0.27416200  |
| H  | -3.23478300 | 2.67860900  | -0.26798800 |
| H  | -1.23922400 | 3.06086200  | 2.04690100  |
| H  | -0.77226500 | -2.80955800 | 3.06979800  |
| H  | 2.67743600  | -0.94922400 | 1.56512800  |
| H  | 4.40930900  | -2.95835400 | -0.58047900 |
| H  | 2.11868300  | -2.33034600 | -1.13477800 |
| H  | -1.46931600 | -1.30548600 | 1.36573500  |
| H  | 0.04772200  | -1.83036400 | -3.37276600 |
| H  | -0.93180300 | -3.28734800 | -3.69327500 |
| H  | 0.40581400  | -3.57287300 | -1.62293300 |
| H  | -2.58218900 | -3.24028400 | -1.01999500 |
| C  | -3.31654300 | 2.77072600  | 2.51245000  |
| H  | -1.70349100 | -1.82801800 | -3.01289100 |
| H  | -1.42472500 | -4.21997400 | -0.08137000 |
| H  | 2.38215300  | -5.27730100 | 1.66682600  |
| H  | 1.41877200  | -5.13629400 | 0.16417200  |
| H  | 4.46057800  | -4.54368900 | 0.25426500  |
| C  | 1.79817300  | -1.66468500 | 3.46562600  |
| H  | 1.95012100  | -2.73375200 | 3.22009800  |
| H  | 2.66085900  | -1.35960300 | 4.08298300  |
| H  | 0.47340000  | -2.20439200 | 5.09872800  |
| H  | 0.44413800  | -0.48382000 | 4.65493600  |
| H  | -1.49290300 | 2.98193900  | -0.45207200 |
| H  | -3.10149300 | 2.36996100  | 3.51645300  |
| H  | -3.57259100 | 3.83872200  | 2.61291300  |
| H  | -4.19618700 | 2.24154600  | 2.10520200  |
| Cu | -1.68322500 | -0.33745200 | -1.07288700 |
| I  | -4.20391200 | -0.48031700 | -0.84696200 |
| C  | 1.12816800  | 1.35731400  | -0.95792000 |
| H  | 1.04531200  | 0.62867700  | -0.14964000 |
| C  | 0.74037600  | 0.90173200  | -2.27943500 |
| H  | 1.07454800  | 1.52357600  | -3.13374500 |
| H  | 0.98415200  | -0.15947900 | -2.48343200 |
| O  | -0.53201300 | 1.16758900  | -1.80971400 |
| C  | 1.24122700  | 2.75629000  | -0.56549300 |
| C  | 1.26828900  | 3.07634000  | 0.79876300  |
| C  | 1.25349900  | 3.79613700  | -1.50574200 |
| C  | 1.29927900  | 4.40220400  | 1.21484700  |
| H  | 1.23659600  | 2.27294400  | 1.54293200  |
| C  | 1.27918200  | 5.12053100  | -1.08847500 |
| H  | 1.22492800  | 3.55658800  | -2.57242900 |
| C  | 1.30053000  | 5.42964700  | 0.27292700  |
| H  | 1.30900200  | 4.63042700  | 2.28502800  |

|   |            |            |             |
|---|------------|------------|-------------|
| H | 1.27908900 | 5.92349200 | -1.83208400 |
| H | 1.31631800 | 6.47490800 | 0.59743500  |
| I | 3.98145800 | 0.55604900 | -1.00509000 |

**G10-Cu-IM2**

|   |             |             |             |
|---|-------------|-------------|-------------|
| H | 3.54865400  | 3.53846300  | -2.14304600 |
| H | -1.30672600 | 4.29030800  | 1.35957200  |
| H | 1.19951200  | 4.32573800  | 1.31188200  |
| H | -1.11571300 | 5.50382500  | -1.44323600 |
| H | 1.90725800  | -1.42991200 | 0.94156900  |
| H | -1.78330800 | 0.81873900  | 2.34162100  |
| H | 2.01717600  | 0.64711700  | 3.82593700  |
| O | -0.54456100 | -1.00873100 | 2.91062600  |
| N | 1.13659900  | 1.68152000  | -0.65613400 |
| N | -0.70991000 | 3.11804600  | -0.27624800 |
| N | -0.09555100 | 1.50283900  | 1.31039100  |
| N | 1.11816300  | -1.70778000 | 1.53791500  |
| C | 0.16612100  | 2.09473200  | 0.09200600  |
| C | -1.28820000 | 1.77647000  | 2.10632400  |
| C | 1.31360100  | 1.31644400  | 3.30003900  |
| C | 0.91563600  | 0.67354800  | 1.96865400  |
| C | 0.41420200  | -0.76229200 | 2.18106000  |
| C | 0.77701000  | -3.12313600 | 1.54807900  |
| C | 1.67466900  | 2.50838700  | -1.72415500 |
| C | 3.09786800  | 2.90632700  | -1.35829100 |
| C | 1.63466800  | 1.78880100  | -3.06334800 |
| C | -0.77605700 | 4.41321400  | 0.39544000  |
| C | -1.61176200 | 5.33620000  | -0.46903100 |
| C | 0.59361400  | 5.00643900  | 0.69067800  |
| C | 0.11907700  | 1.65815200  | 4.18131800  |
| C | 0.86523300  | -3.67894500 | 0.13822900  |
| H | 0.52531000  | -4.72831700 | 0.11962100  |
| H | 1.90952200  | -3.65473500 | -0.22342100 |
| H | -0.26703800 | -3.17827800 | 1.90264400  |
| H | 1.87726600  | 2.23945700  | 3.05974300  |
| H | -1.99636600 | 2.35615100  | 1.49949300  |
| H | -2.60437300 | 4.89870900  | -0.66154700 |
| H | -0.74451300 | 3.20813100  | -1.28751000 |
| H | 1.78836200  | 0.64959900  | 1.29625400  |
| H | 0.61094100  | 1.47630500  | -3.32445100 |
| H | 2.01905300  | 2.44322600  | -3.86454900 |
| H | 1.08924000  | 3.45021300  | -1.83610000 |
| H | 3.71799200  | 2.00288400  | -1.22733200 |
| C | 1.67008500  | -3.86608700 | 2.52829000  |

|    |             |             |             |
|----|-------------|-------------|-------------|
| H  | 2.26159900  | 0.87925300  | -3.03144000 |
| H  | 3.11395700  | 3.46504900  | -0.40726400 |
| H  | 0.50097300  | 5.96220400  | 1.23364900  |
| H  | 1.15454700  | 5.19201700  | -0.24297300 |
| H  | -1.74583800 | 6.31856000  | 0.01023700  |
| C  | -0.90994400 | 2.47252000  | 3.40719500  |
| H  | -0.49036100 | 3.47386800  | 3.18035300  |
| H  | -1.81586500 | 2.63873100  | 4.01626500  |
| H  | 0.45546700  | 2.21342700  | 5.07506100  |
| H  | -0.34886400 | 0.72337500  | 4.53204600  |
| H  | 0.26135500  | -3.07941800 | -0.56701200 |
| H  | 1.56054100  | -3.45792900 | 3.54687300  |
| H  | 1.41967300  | -4.94000300 | 2.55562500  |
| H  | 2.72867400  | -3.76852200 | 2.22849600  |
| Cu | 1.62845100  | -0.40867400 | -1.09856800 |
| I  | 4.07076900  | -0.98968900 | -0.62370600 |
| C  | -1.98621000 | -0.68389600 | -0.73751300 |
| H  | -1.48691300 | -0.27048700 | 0.15597100  |
| C  | -1.12712900 | -0.43553000 | -1.97560000 |
| H  | -1.74434300 | -0.69787100 | -2.87929200 |
| H  | -1.00466100 | 0.68078100  | -2.05581600 |
| O  | 0.00823200  | -1.14503000 | -1.87142600 |
| C  | -2.40819200 | -2.09252800 | -0.48740900 |
| C  | -2.65012900 | -2.52754900 | 0.82078800  |
| C  | -2.57480600 | -3.00237300 | -1.53824500 |
| C  | -3.05524000 | -3.83575800 | 1.07333100  |
| H  | -2.48602100 | -1.83083200 | 1.65130700  |
| C  | -2.97845100 | -4.30943700 | -1.28681800 |
| H  | -2.35737900 | -2.68167500 | -2.56086800 |
| C  | -3.22422700 | -4.73191100 | 0.01975200  |
| H  | -3.22923600 | -4.15801500 | 2.10516200  |
| H  | -3.09233000 | -5.01146100 | -2.11920200 |
| H  | -3.53621000 | -5.76295300 | 0.21615900  |
| I  | -3.83490500 | 0.58898700  | -0.86726900 |

#### **G10-Cu-TS2**

|   |             |             |             |
|---|-------------|-------------|-------------|
| H | 2.94131200  | 3.74271100  | -2.59635900 |
| H | -2.14448200 | 4.25829600  | 0.73442500  |
| H | 0.29609700  | 4.84325000  | 0.63823200  |
| H | -2.18410400 | 5.06317300  | -2.21694300 |
| H | 2.05630500  | -0.68429000 | 1.39201800  |
| H | -2.07597900 | 1.02242600  | 2.23459200  |
| H | 1.58886100  | 1.81195500  | 3.84239600  |
| O | -0.58109900 | -0.42107000 | 3.13799500  |

|   |             |             |             |
|---|-------------|-------------|-------------|
| N | 0.77850200  | 1.84233500  | -0.80519000 |
| N | -1.26665200 | 3.02745200  | -0.71593000 |
| N | -0.48378700 | 1.84426200  | 1.15319300  |
| N | 1.26620300  | -1.00843600 | 1.96448600  |
| C | -0.26736900 | 2.23700000  | -0.15232100 |
| C | -1.75259300 | 2.00797200  | 1.85777200  |
| C | 0.80567300  | 2.24188300  | 3.19333500  |
| C | 0.61511400  | 1.33271600  | 1.97536800  |
| C | 0.36588600  | -0.11983600 | 2.41357900  |
| C | 1.21112500  | -2.43953200 | 2.22817100  |
| C | 1.23519500  | 2.52508100  | -2.00739500 |
| C | 2.57109400  | 3.19382300  | -1.71335900 |
| C | 1.35019500  | 1.56973300  | -3.18732900 |
| C | -1.63731200 | 4.35842800  | -0.24252500 |
| C | -2.64461900 | 4.92933600  | -1.22041100 |
| C | -0.44252200 | 5.28054000  | -0.05459700 |
| C | -0.48319800 | 2.47750000  | 3.96930400  |
| C | 1.47704200  | -3.19621200 | 0.93997200  |
| H | 1.35717100  | -4.28136700 | 1.09480400  |
| H | 2.50407100  | -3.00889300 | 0.57910200  |
| H | 0.18357500  | -2.64563300 | 2.57566400  |
| H | 1.19976500  | 3.20744500  | 2.81940100  |
| H | -2.52140800 | 2.33402100  | 1.14556900  |
| H | -3.50583800 | 4.25133400  | -1.33063200 |
| H | -1.23830600 | 2.97679300  | -1.73007600 |
| H | 1.52083700  | 1.36414300  | 1.34899900  |
| H | 0.38539500  | 1.09355100  | -3.42667400 |
| H | 1.70008500  | 2.10952900  | -4.08355800 |
| H | 0.52733500  | 3.33151300  | -2.30739300 |
| H | 3.31894000  | 2.43582800  | -1.42444900 |
| C | 2.19293900  | -2.80085000 | 3.33077300  |
| H | 2.07655100  | 0.76289800  | -2.97273700 |
| H | 2.47906300  | 3.90429700  | -0.87471300 |
| H | -0.75624500 | 6.25361200  | 0.35986500  |
| H | 0.06829300  | 5.46678700  | -1.01616400 |
| H | -3.00916400 | 5.91367200  | -0.88758600 |
| C | -1.59158400 | 2.95449000  | 3.03968400  |
| H | -1.34873100 | 3.97150300  | 2.67004100  |
| H | -2.55010900 | 3.03393200  | 3.58199800  |
| H | -0.31171500 | 3.21410200  | 4.77411300  |
| H | -0.79299200 | 1.53281800  | 4.44605000  |
| H | 0.79258600  | -2.86410200 | 0.14143000  |
| H | 1.95857200  | -2.25638100 | 4.26056500  |
| H | 2.16582900  | -3.88237100 | 3.54473000  |

|    |             |             |             |
|----|-------------|-------------|-------------|
| H  | 3.22083600  | -2.53752900 | 3.02427600  |
| Cu | 1.70254500  | -0.11440700 | -0.80079500 |
| I  | 4.15812000  | -0.16364300 | -0.08940300 |
| C  | -1.87110400 | -1.00586700 | -0.44763900 |
| H  | -1.46537100 | -0.38106000 | 0.36721700  |
| C  | -1.07971000 | -0.77283800 | -1.72746300 |
| H  | -1.57434000 | -1.30243400 | -2.57345500 |
| H  | -1.16363100 | 0.31321700  | -1.97225100 |
| O  | 0.20602700  | -1.20078700 | -1.57279600 |
| C  | -2.02384400 | -2.41557500 | 0.01445500  |
| C  | -2.21964200 | -2.67124200 | 1.37711900  |
| C  | -1.97429100 | -3.49499000 | -0.87639100 |
| C  | -2.36676900 | -3.97442600 | 1.84217700  |
| H  | -2.22145200 | -1.83045600 | 2.08095200  |
| C  | -2.11791000 | -4.79810700 | -0.40804200 |
| H  | -1.78886300 | -3.31842400 | -1.94001500 |
| C  | -2.31812900 | -5.04420600 | 0.94944300  |
| H  | -2.50791100 | -4.15445500 | 2.91281200  |
| H  | -2.06106500 | -5.63216000 | -1.11446400 |
| H  | -2.42562000 | -6.07126600 | 1.31327100  |
| I  | -3.89566700 | -0.11820400 | -0.74161100 |
| C  | 0.87068300  | -2.43300000 | -2.88235200 |
| O  | -0.06690300 | -2.70581600 | -3.55699300 |
| O  | 2.00898500  | -2.50939000 | -2.58221800 |

**G10-Cu-IM3**

|    |             |             |             |
|----|-------------|-------------|-------------|
| Cu | 2.27891300  | -0.85791600 | -0.90131500 |
| I  | 3.71283500  | -2.78316100 | -0.04545600 |
| H  | 5.50315700  | 1.14228900  | -2.46533000 |
| H  | 1.81810400  | 4.60151700  | 1.40070700  |
| H  | 3.71245000  | 2.99401800  | 1.74916400  |
| H  | 3.40735000  | 5.50617400  | -1.05606500 |
| H  | 1.28312500  | -1.99510800 | 0.88197500  |
| H  | -0.83625600 | 2.06014000  | 1.45026700  |
| H  | 1.47878500  | -0.36142000 | 3.80045100  |
| O  | -1.08048700 | -0.08961300 | 1.80115500  |
| N  | 2.65374000  | 1.16001200  | -0.61168300 |
| N  | 1.91115300  | 3.38506100  | -0.30679600 |
| N  | 1.20232700  | 1.71658100  | 1.14366400  |
| N  | 0.32330200  | -1.72346700 | 1.12324900  |
| C  | 1.94160000  | 2.02903200  | 0.03365600  |
| C  | 0.12243400  | 2.57249900  | 1.62996500  |
| C  | 1.46850100  | 0.62370700  | 3.30091800  |
| C  | 1.29106600  | 0.41419200  | 1.79215800  |

|   |             |             |             |
|---|-------------|-------------|-------------|
| C | 0.05924300  | -0.47352700 | 1.54495300  |
| C | -0.73724800 | -2.68852300 | 0.86040200  |
| C | 3.52966700  | 1.59773500  | -1.68808900 |
| C | 4.79983600  | 0.76733600  | -1.70192300 |
| C | 2.79412300  | 1.52111100  | -3.02164300 |
| C | 2.51989400  | 4.38577900  | 0.56988800  |
| C | 2.69138900  | 5.66308900  | -0.22794600 |
| C | 3.83735500  | 3.93074800  | 1.18189300  |
| C | 0.40251000  | 1.53329000  | 3.89770700  |
| C | -0.34994500 | -3.59743000 | -0.28762000 |
| H | -1.17277100 | -4.30243700 | -0.49318500 |
| H | 0.55840000  | -4.17899800 | -0.04682100 |
| H | -1.61585000 | -2.09412000 | 0.55969200  |
| H | 2.46978200  | 1.07059300  | 3.45521200  |
| H | 0.10532200  | 3.49272500  | 1.03459000  |
| H | 1.73317700  | 5.99125500  | -0.66134700 |
| H | 2.15195500  | 3.52785500  | -1.28124100 |
| H | 2.18644400  | -0.09208300 | 1.39302900  |
| H | 1.85386200  | 2.09902100  | -2.99868000 |
| H | 3.42541100  | 1.88487300  | -3.85078800 |
| H | 3.84557600  | 2.65371700  | -1.52988800 |
| H | 4.57577300  | -0.29191900 | -1.91653300 |
| C | -1.07883700 | -3.45454500 | 2.12785800  |
| H | 2.50246300  | 0.47737000  | -3.23050100 |
| H | 5.29441900  | 0.79591100  | -0.71680700 |
| H | 4.23210200  | 4.69348100  | 1.87397800  |
| H | 4.59651900  | 3.75007700  | 0.40022800  |
| H | 3.08469600  | 6.47577800  | 0.40253900  |
| C | 0.30739500  | 2.83842600  | 3.11610800  |
| H | 1.23742700  | 3.42439500  | 3.26951900  |
| H | -0.52591700 | 3.45805300  | 3.49157200  |
| H | 0.62716100  | 1.73239400  | 4.96076300  |
| H | -0.57282700 | 1.01958500  | 3.86039300  |
| H | -0.14983900 | -3.00574400 | -1.19549200 |
| H | -1.38074000 | -2.76449500 | 2.93321100  |
| H | -1.91349600 | -4.15364700 | 1.94889500  |
| H | -0.20513100 | -4.03617700 | 2.47283700  |
| C | -0.37623500 | -0.12548200 | -1.77271600 |
| O | 0.54083500  | -0.95473900 | -1.96336200 |
| O | -0.35806800 | 1.00790300  | -1.29882000 |
| C | -2.70330200 | 0.24495200  | -2.09258000 |
| C | -3.26920800 | 0.25264100  | -0.68579100 |
| O | -1.62030700 | -0.63535700 | -2.18674700 |
| H | -3.46848700 | -0.08706500 | -2.81878100 |



|   |             |             |             |
|---|-------------|-------------|-------------|
| H | -2.39917000 | 1.27235000  | -2.35407900 |
| C | -3.81013200 | -1.03745900 | -0.16387600 |
| C | -4.07943200 | -2.12420500 | -1.00112800 |
| C | -4.00836800 | -1.18760700 | 1.21630200  |
| C | -4.54363400 | -3.32824700 | -0.47322200 |
| H | -3.88449300 | -2.04687300 | -2.07367800 |
| C | -4.48199100 | -2.38273700 | 1.74112100  |
| H | -3.74826500 | -0.35379700 | 1.87572700  |
| C | -4.75367100 | -3.46054400 | 0.89650000  |
| H | -4.73319000 | -4.17341200 | -1.14224100 |
| H | -4.62034800 | -2.48380100 | 2.82224800  |
| H | -5.11529600 | -4.40757900 | 1.30995400  |
| H | -2.51319200 | 0.66100300  | 0.00540600  |
| I | -4.86083900 | 1.79156600  | -0.64128000 |

**G10-Cu-TS3**

|    |             |             |             |
|----|-------------|-------------|-------------|
| Cu | 2.25082200  | -0.49038900 | -1.03951300 |
| I  | 4.27835800  | -1.91436000 | -0.56522400 |
| H  | 4.10139900  | 2.28078800  | -3.28008700 |
| H  | 0.90012300  | 4.57192000  | 1.75143000  |
| H  | 3.13820100  | 3.47642400  | 1.44351600  |
| H  | 1.53122600  | 5.97507000  | -0.89682800 |
| H  | 1.92705700  | -1.88261100 | 0.80681100  |
| H  | -0.91493900 | 1.43505300  | 2.26124600  |
| H  | 2.54258200  | -0.22537100 | 3.66955700  |
| O  | -0.46902700 | -0.68956900 | 2.50202500  |
| N  | 1.90871500  | 1.53659900  | -0.78672600 |
| N  | 0.82531300  | 3.50687000  | -0.05679100 |
| N  | 0.95188200  | 1.66566700  | 1.35502800  |
| N  | 1.02275300  | -1.86852100 | 1.28862900  |
| C  | 1.25194700  | 2.18834100  | 0.12466400  |
| C  | -0.12191300 | 2.19828300  | 2.19516200  |
| C  | 2.11687000  | 0.71195000  | 3.26960700  |
| C  | 1.57201300  | 0.44328500  | 1.86272900  |
| C  | 0.59543700  | -0.74572900 | 1.89696500  |
| C  | 0.15282500  | -3.02698500 | 1.14061400  |
| C  | 2.36266600  | 2.23082000  | -1.98839000 |
| C  | 3.71621000  | 1.70003000  | -2.42462800 |
| C  | 1.33592900  | 2.10182600  | -3.10808400 |
| C  | 1.39156400  | 4.58641900  | 0.75957800  |
| C  | 1.04562000  | 5.90313600  | 0.09415300  |
| C  | 2.89122800  | 4.44346700  | 0.97508100  |
| C  | 1.06691100  | 1.28870500  | 4.21005700  |
| C  | 0.54778900  | -3.78732000 | -0.10815500 |

|   |             |             |             |
|---|-------------|-------------|-------------|
| H | -0.12758200 | -4.64481300 | -0.26154400 |
| H | 1.58338200  | -4.16496100 | -0.03096200 |
| H | -0.86937900 | -2.62669900 | 1.01954100  |
| H | 2.95820500  | 1.42497600  | 3.16704000  |
| H | -0.55457600 | 3.07764700  | 1.70319000  |
| H | -0.04194600 | 6.00139200  | -0.04963300 |
| H | 0.80419000  | 3.75706600  | -1.03958300 |
| H | 2.41790000  | 0.20279500  | 1.19521100  |
| H | 0.34560900  | 2.48715000  | -2.80504200 |
| H | 1.65798600  | 2.65168700  | -4.00856000 |
| H | 2.50564100  | 3.31346600  | -1.77467500 |
| H | 3.64779200  | 0.63993000  | -2.72758700 |
| C | 0.16743800  | -3.89447000 | 2.38736400  |
| H | 1.19443200  | 1.04072100  | -3.37298400 |
| H | 4.44542500  | 1.75358700  | -1.60032600 |
| H | 3.27064500  | 5.24272300  | 1.63309700  |
| H | 3.43566800  | 4.50130800  | 0.01579300  |
| H | 1.39437000  | 6.75541600  | 0.69761600  |
| C | 0.40324400  | 2.51064300  | 3.58844800  |
| H | 1.14089700  | 3.33694300  | 3.52871800  |
| H | -0.42547000 | 2.87041800  | 4.22273400  |
| H | 1.52899400  | 1.54947600  | 5.17852500  |
| H | 0.29919300  | 0.52290400  | 4.40902600  |
| H | 0.49780000  | -3.13602600 | -0.99596900 |
| H | -0.13923900 | -3.30554000 | 3.26654200  |
| H | -0.53567000 | -4.73808300 | 2.27829900  |
| H | 1.17674200  | -4.30483100 | 2.56831400  |
| C | -0.54630800 | -0.47267600 | -1.71800200 |
| O | 0.52172400  | -0.91694600 | -2.14678700 |
| O | -0.84074700 | -0.14496800 | -0.53593300 |
| C | -2.69540300 | 0.32021800  | -2.05510800 |
| C | -2.83105200 | 0.00440500  | -0.58513100 |
| O | -1.55624200 | -0.31168700 | -2.61751000 |
| H | -3.56883600 | -0.03341300 | -2.62017700 |
| H | -2.62930900 | 1.41464700  | -2.18481400 |
| C | -3.13431800 | -1.33889900 | -0.09579000 |
| C | -3.18656800 | -2.43943100 | -0.96356200 |
| C | -3.28330800 | -1.55143500 | 1.28231900  |
| C | -3.39096100 | -3.72065500 | -0.46126500 |
| H | -3.04388100 | -2.29471100 | -2.03856000 |
| C | -3.48704900 | -2.83023900 | 1.77995700  |
| H | -3.23095600 | -0.69424000 | 1.95921400  |
| C | -3.54317900 | -3.92080600 | 0.90968000  |
| H | -3.42391600 | -4.57193600 | -1.14787700 |

|   |             |             |             |
|---|-------------|-------------|-------------|
| H | -3.58980400 | -2.98101900 | 2.85863600  |
| H | -3.69756200 | -4.93029100 | 1.30392800  |
| H | -2.76306300 | 0.80246300  | 0.14975900  |
| I | -5.50015500 | 1.02518300  | -0.53159800 |

**G10-Cu-IM4**

|    |             |             |             |
|----|-------------|-------------|-------------|
| Cu | -1.96073700 | -1.16504900 | 0.00277300  |
| I  | -4.37481300 | -1.72842100 | 0.09415700  |
| H  | -0.14351500 | -4.30014700 | 1.99163000  |
| H  | 1.93685600  | 0.50329700  | 3.44966700  |
| H  | 1.68780400  | -1.96862300 | 3.66351500  |
| H  | 4.56437600  | -0.15407400 | 1.99581500  |
| H  | -3.43849100 | 0.83709400  | 0.18113700  |
| H  | 0.71297900  | 2.96482100  | 0.91191200  |
| H  | -2.79645300 | 2.28134300  | 2.87323400  |
| O  | -1.27940000 | 3.14267100  | -0.03158600 |
| N  | -0.12414100 | -1.12861400 | 0.74939800  |
| N  | 1.94537700  | -0.31904800 | 1.53599400  |
| N  | 0.08229600  | 1.07287500  | 1.54649500  |
| N  | -3.06125500 | 1.75369500  | -0.08240900 |
| C  | 0.60283700  | -0.17549800 | 1.27803100  |
| C  | 0.91834100  | 2.26271700  | 1.73546900  |
| C  | -1.71718200 | 2.04964700  | 2.88859100  |
| C  | -1.34878600 | 1.32960100  | 1.58421500  |
| C  | -1.85703100 | 2.14796800  | 0.38711500  |
| C  | -3.74435200 | 2.46667100  | -1.15143700 |
| C  | 0.32226800  | -2.52870900 | 0.82019700  |
| C  | -0.47485400 | -3.25247800 | 1.89576000  |
| C  | 0.17082100  | -3.20287500 | -0.53128700 |
| C  | 2.58100000  | -0.15877700 | 2.84198100  |
| C  | 3.95567900  | 0.46764000  | 2.67673100  |
| C  | 2.68180600  | -1.50633000 | 3.54378900  |
| C  | -0.88020600 | 3.29755500  | 3.12278300  |
| C  | -3.27616100 | 1.99732400  | -2.51829500 |
| H  | -3.77630200 | 2.56485100  | -3.32121200 |
| H  | -3.49739500 | 0.92560000  | -2.65283100 |
| H  | -3.46557700 | 3.52934600  | -1.02970000 |
| H  | -1.55339500 | 1.33239200  | 3.71518400  |
| H  | 1.97234600  | 1.97768300  | 1.65034500  |
| H  | 3.89834100  | 1.47799900  | 2.24007800  |
| H  | 2.42971700  | -1.02082200 | 0.95741000  |
| H  | -1.86322800 | 0.35214500  | 1.58632500  |
| H  | 0.80063800  | -2.71404600 | -1.29294300 |
| H  | 0.49788300  | -4.25383800 | -0.47323000 |

|   |             |             |             |
|---|-------------|-------------|-------------|
| H | 1.39401300  | -2.59114900 | 1.08552100  |
| H | -1.55286500 | -3.24853100 | 1.65212800  |
| C | -5.24211300 | 2.29883400  | -0.97706100 |
| H | -0.88293100 | -3.18818600 | -0.87247600 |
| H | -0.35324300 | -2.76000800 | 2.87617300  |
| H | 3.14116800  | -1.40772500 | 4.54180600  |
| H | 3.30649400  | -2.19201200 | 2.94373900  |
| H | 4.47813400  | 0.54048600  | 3.64494300  |
| C | 0.60074500  | 2.95186200  | 3.05133800  |
| H | 0.86728200  | 2.29204600  | 3.90125400  |
| H | 1.22267200  | 3.85897800  | 3.14345100  |
| H | -1.13446900 | 3.75005800  | 4.09726900  |
| H | -1.11579200 | 4.04741400  | 2.34644000  |
| H | -2.18777700 | 2.13321600  | -2.62331900 |
| H | -5.57660700 | 2.67233900  | 0.00424400  |
| H | -5.79101300 | 2.84307800  | -1.76244500 |
| H | -5.51802200 | 1.23137400  | -1.04528000 |
| C | -0.33594100 | -0.31001700 | -2.40162300 |
| O | -1.46085100 | -0.71391100 | -2.32213800 |
| O | 0.17458600  | 0.66181300  | -1.64109100 |
| C | 1.78721100  | -0.02033200 | -3.11139700 |
| C | 1.60529700  | 0.60704900  | -1.73818100 |
| O | 0.58367100  | -0.77510700 | -3.25401800 |
| H | 1.84305100  | 0.73181000  | -3.91937500 |
| H | 2.65597200  | -0.69801300 | -3.13978200 |
| C | 2.23157500  | 1.93812600  | -1.49935200 |
| C | 1.51021200  | 3.12453800  | -1.64193200 |
| C | 3.57157200  | 1.97511000  | -1.09915900 |
| C | 2.13004100  | 4.34565100  | -1.38352500 |
| H | 0.44435300  | 3.08560400  | -1.88393600 |
| C | 4.18546400  | 3.19932200  | -0.84915900 |
| H | 4.11460100  | 1.02820200  | -0.96576000 |
| C | 3.46621000  | 4.38645800  | -0.98968600 |
| H | 1.55291800  | 5.27117200  | -1.47181200 |
| H | 5.23180500  | 3.22404600  | -0.52912300 |
| H | 3.94745800  | 5.34758500  | -0.78138800 |
| H | 1.98163800  | -0.11458400 | -0.98642600 |
| I | 4.18838300  | -2.09664000 | -0.67230300 |

**G5-TS1**

|   |             |             |             |
|---|-------------|-------------|-------------|
| N | -2.45348100 | -1.70814400 | 0.30508500  |
| C | -3.29509100 | -0.92480600 | -0.40237300 |
| N | -3.46940000 | -0.72778400 | -1.65871100 |
| N | -4.06802100 | -0.14656700 | 0.48585400  |

|   |             |             |             |
|---|-------------|-------------|-------------|
| C | -4.49185200 | 0.31004200  | -1.73746600 |
| H | -4.25309100 | 1.05820600  | -2.51139800 |
| H | -5.47367300 | -0.12413000 | -2.00990200 |
| C | -4.56411100 | 0.94827300  | -0.32246000 |
| H | -5.58116900 | 1.26024600  | -0.03962900 |
| H | -3.89263400 | 1.82690700  | -0.24331400 |
| C | -3.27008700 | 0.01835000  | 1.68934000  |
| H | -3.88823100 | 0.14807800  | 2.59016400  |
| H | -2.58681300 | 0.88663200  | 1.59733200  |
| C | -2.47379300 | -1.30422700 | 1.70218000  |
| H | -1.52983600 | -2.04465100 | -0.04179900 |
| C | 1.24309300  | -2.09193900 | -0.40448200 |
| H | 2.07855700  | -2.81422300 | -0.29902200 |
| C | 1.41215100  | -0.91203800 | 0.46127200  |
| H | 1.72747000  | -1.14202900 | 1.47801200  |
| O | 0.09836600  | -2.38936600 | 0.26942700  |
| I | 3.79174200  | 0.05757800  | -0.07572000 |
| H | 1.14839500  | -1.83376700 | -1.48174100 |
| C | 0.55008800  | 0.28449100  | 0.30246700  |
| C | -0.33560000 | 0.41734200  | -0.77418600 |
| C | 0.62316000  | 1.32347700  | 1.24136700  |
| C | -1.09446100 | 1.57535300  | -0.92847100 |
| H | -0.46353100 | -0.40168900 | -1.48290100 |
| C | -0.13524300 | 2.48034900  | 1.08934300  |
| H | 1.32209200  | 1.22801600  | 2.07542100  |
| C | -0.99108900 | 2.61663300  | -0.00574600 |
| H | -1.78532700 | 1.64227100  | -1.77129200 |
| H | -0.05020000 | 3.28385900  | 1.82373300  |
| H | -1.58429200 | 3.52520600  | -0.13067900 |
| H | -1.44355000 | -1.18172600 | 2.06512600  |
| H | -2.97759500 | -2.05870400 | 2.33240000  |

#### **G6-TS1**

|   |             |             |             |
|---|-------------|-------------|-------------|
| N | -0.55297400 | -1.47841900 | -0.18079200 |
| C | 0.33310900  | -0.53546000 | 0.20885000  |
| C | -1.97348100 | -1.18397500 | -0.18637100 |
| H | -2.40204000 | -1.26879300 | 0.83166400  |
| H | -2.47201000 | -1.94341500 | -0.80445000 |
| N | 1.51862500  | -0.74447800 | 0.67462100  |
| N | -0.01954100 | 0.82166600  | 0.05242500  |
| C | 2.12885900  | 0.56293100  | 0.83690800  |
| H | 2.71539600  | 0.62821600  | 1.76675300  |
| H | 2.82532400  | 0.77898800  | 0.00253000  |
| C | 0.95903500  | 1.56838900  | 0.81356200  |

|   |             |             |             |
|---|-------------|-------------|-------------|
| H | 1.20746700  | 2.53011500  | 0.33752800  |
| H | 0.58115700  | 1.77930200  | 1.83723400  |
| C | -1.40898200 | 1.21450800  | 0.09274200  |
| H | -1.50599700 | 2.23322900  | -0.31807400 |
| H | -1.78584400 | 1.24037200  | 1.13844600  |
| C | -2.22629400 | 0.21889800  | -0.71924700 |
| H | -3.29605200 | 0.46667300  | -0.65654600 |
| H | -1.91659200 | 0.27818000  | -1.77467700 |
| H | -0.36203600 | -2.47066500 | 0.08788700  |
| C | -0.40032700 | -4.79666600 | 1.56477000  |
| H | -0.36888400 | -5.89526000 | 1.41025400  |
| C | -1.58975300 | -4.37677100 | 2.33053100  |
| H | -2.51765600 | -4.83968000 | 1.99743600  |
| O | -0.83357400 | -4.05032400 | 0.51115600  |
| I | -1.65417600 | -5.74880500 | 4.54658800  |
| H | 0.55692100  | -4.49553700 | 2.04307800  |
| C | -1.71059200 | -2.98753500 | 2.83435900  |
| C | -0.61953800 | -2.11067000 | 2.83849300  |
| C | -2.95031000 | -2.52085900 | 3.29375800  |
| C | -0.77205800 | -0.79981600 | 3.28396200  |
| H | 0.34550000  | -2.42051200 | 2.43428800  |
| C | -3.10244600 | -1.21221500 | 3.74167600  |
| H | -3.79595400 | -3.21224900 | 3.30882000  |
| C | -2.01003600 | -0.34218400 | 3.73706000  |
| H | 0.09179400  | -0.13206900 | 3.25437900  |
| H | -4.07661300 | -0.86921400 | 4.09596000  |
| H | -2.12368600 | 0.68762300  | 4.08302300  |

#### **G7-TS1**

|   |             |             |             |
|---|-------------|-------------|-------------|
| N | -0.03836700 | -1.53426000 | -0.51464900 |
| C | -0.90281800 | -0.52518400 | -0.26427900 |
| N | -0.39243100 | 0.71940300  | 0.18219000  |
| C | 1.18185800  | -1.77718000 | 0.22728400  |
| H | 1.43347400  | -2.82129000 | -0.00165300 |
| H | 1.00485400  | -1.70357800 | 1.31899300  |
| C | 2.34211900  | -0.86922100 | -0.15769700 |
| H | 2.48730700  | -0.93715400 | -1.24785000 |
| H | 3.26306800  | -1.24547000 | 0.31768800  |
| C | -2.71699200 | 0.69521100  | -0.02771700 |
| H | -3.18678000 | 0.62165900  | 0.97237400  |
| H | -3.49962200 | 1.05152100  | -0.71704500 |
| C | 0.87013400  | 1.20618800  | -0.36369200 |
| H | 0.89379000  | 2.28827500  | -0.16345100 |
| H | 0.89387400  | 1.07636300  | -1.46612100 |

|   |             |             |             |
|---|-------------|-------------|-------------|
| C | -1.50881200 | 1.64505200  | 0.01421600  |
| H | -1.54973900 | 2.39230700  | 0.82186100  |
| H | -1.40712100 | 2.18524800  | -0.94946300 |
| C | 2.11940000  | 0.58190600  | 0.24595300  |
| H | 2.04001500  | 0.66199100  | 1.34389700  |
| H | 2.98605300  | 1.18891000  | -0.06358600 |
| N | -2.17992000 | -0.59135900 | -0.42037900 |
| H | -0.41846700 | -2.40674200 | -0.91216400 |
| C | -0.02794100 | -4.76858300 | -2.58550300 |
| H | -0.17816000 | -5.86567700 | -2.50285300 |
| C | 1.37567100  | -4.42274800 | -2.88216500 |
| H | 2.10442600  | -4.95884000 | -2.27571000 |
| O | 0.05334700  | -4.07397500 | -1.42163200 |
| I | 2.06728100  | -5.81191400 | -4.98333800 |
| H | -0.73659200 | -4.39015000 | -3.35658800 |
| C | 1.75339400  | -3.04060700 | -3.26874100 |
| C | 0.78621900  | -2.05536200 | -3.50430600 |
| C | 3.10570600  | -2.69795200 | -3.40664600 |
| C | 1.16405000  | -0.76832600 | -3.88022700 |
| H | -0.26673800 | -2.29280200 | -3.35141500 |
| C | 3.48434800  | -1.41276300 | -3.78375600 |
| H | 3.86045800  | -3.47062000 | -3.24473200 |
| C | 2.51228600  | -0.43976400 | -4.02408300 |
| H | 0.39464000  | -0.01185200 | -4.04872200 |
| H | 4.54302900  | -1.16915900 | -3.89292200 |
| H | 2.80470400  | 0.57076400  | -4.31734100 |

#### **G8-TS1**

|   |             |             |             |
|---|-------------|-------------|-------------|
| N | -3.56400300 | 0.00889300  | 0.17525000  |
| N | -1.45708300 | 0.03983400  | 1.26876700  |
| C | -3.70156700 | -1.43367400 | 0.21875200  |
| H | -4.03699900 | -1.78391100 | -0.77710100 |
| H | -4.50356200 | -1.71066100 | 0.93152100  |
| C | -2.40147700 | -2.12305700 | 0.60397400  |
| C | -1.72247700 | -1.30449200 | 1.69787200  |
| C | -2.38072600 | 0.63259100  | 0.58596500  |
| N | -2.24175100 | 1.94954900  | 0.26680000  |
| H | -1.26921300 | 2.34337100  | 0.29841500  |
| C | -4.57743800 | 0.66644300  | -0.62473700 |
| H | -5.56712700 | 0.28847500  | -0.30804100 |
| H | -4.45253100 | 0.38671800  | -1.69211000 |
| C | -4.51123400 | 2.17675900  | -0.49645900 |
| C | -3.06953100 | 2.60026800  | -0.71628000 |
| H | -2.94204200 | 3.68539500  | -0.59762700 |

|   |             |             |             |
|---|-------------|-------------|-------------|
| H | -2.76744500 | 2.35431800  | -1.75446000 |
| H | -5.18585300 | 2.63838600  | -1.23259700 |
| H | -4.83209500 | 2.48337400  | 0.51161400  |
| H | -2.60818100 | -3.15802200 | 0.91730000  |
| H | -1.72313100 | -2.16462000 | -0.26272600 |
| H | -0.77615800 | -1.78410000 | 1.99471600  |
| H | -2.37110700 | -1.32285700 | 2.60134600  |
| C | 1.17561500  | 2.60402900  | -0.52448000 |
| H | 2.11383800  | 3.13384800  | -0.25644000 |
| C | 0.89370800  | 2.68752500  | -1.97236100 |
| H | 0.99316100  | 3.69290400  | -2.37849700 |
| O | 0.01218500  | 3.26509200  | -0.26515400 |
| I | 2.99961800  | 1.89202700  | -3.26888100 |
| C | -0.16619900 | 1.85808700  | -2.59426100 |
| C | -0.74675100 | 2.27036300  | -3.80153800 |
| C | -0.61306000 | 0.66677700  | -2.00727000 |
| C | -1.75406500 | 1.52430400  | -4.40710200 |
| H | -0.38530400 | 3.18800000  | -4.27109100 |
| C | -1.62555400 | -0.07629800 | -2.61015300 |
| H | -0.20448000 | 0.33872700  | -1.04924900 |
| C | -2.20145900 | 0.34506700  | -3.81026500 |
| H | -2.19170100 | 1.86406500  | -5.34797900 |
| H | -1.97899900 | -0.99152200 | -2.12884400 |
| H | -2.99330500 | -0.24417700 | -4.27778300 |
| H | 1.25640600  | 1.56345800  | -0.14426700 |

### G9-TS1

|   |             |             |             |
|---|-------------|-------------|-------------|
| N | -1.52505300 | -1.05544900 | -0.92099200 |
| N | 0.32360500  | -1.62004000 | 0.31915000  |
| C | -0.47888400 | -0.68983500 | -0.25297700 |
| N | -0.12902900 | 0.65427900  | -0.04497600 |
| C | -2.28780900 | 0.01749700  | -1.50035700 |
| H | -3.24974000 | -0.37492900 | -1.86563300 |
| H | -1.77988100 | 0.47475500  | -2.37941700 |
| C | -2.50981900 | 1.11416500  | -0.45899900 |
| H | -2.97762300 | 0.65272100  | 0.42446200  |
| H | -3.16979200 | 1.92193300  | -0.81252300 |
| C | -1.14431200 | 1.68684600  | -0.10725300 |
| H | -1.18168100 | 2.24364900  | 0.85040300  |
| H | -0.85317300 | 2.42391300  | -0.88186800 |
| C | 1.23292400  | 1.16662400  | 0.02487300  |
| H | 1.45496300  | 1.54833300  | 1.04373700  |
| H | 1.27051300  | 2.04863300  | -0.64142000 |
| C | 2.32672300  | 0.19542800  | -0.41331600 |



|   |             |             |             |
|---|-------------|-------------|-------------|
| H | 3.22755800  | 0.77962700  | -0.65737700 |
| H | 2.00683000  | -0.28681000 | -1.34827000 |
| C | 2.64844400  | -0.87249800 | 0.63122500  |
| H | 3.13608600  | -1.73028000 | 0.14358300  |
| H | 3.33497600  | -0.47976500 | 1.40151800  |
| C | 1.35614200  | -1.35652100 | 1.28503000  |
| H | 1.53439000  | -2.29811200 | 1.82144600  |
| H | 0.99602100  | -0.60964000 | 2.01436300  |
| H | 0.35060500  | -2.58431100 | -0.04717000 |
| C | 1.46869700  | -5.00136200 | -1.02665400 |
| H | 1.80530400  | -5.99686200 | -0.66816000 |
| C | 2.54499100  | -4.27262000 | -1.72526500 |
| H | 3.50329800  | -4.29243100 | -1.20703000 |
| O | 1.40107800  | -4.00971900 | -0.10027000 |
| I | 3.47724000  | -5.89280100 | -3.55207000 |
| H | 0.57237500  | -5.15881400 | -1.66736800 |
| C | 2.25645500  | -3.03820600 | -2.49801900 |
| C | 0.94967100  | -2.57156000 | -2.69007800 |
| C | 3.31653700  | -2.30791000 | -3.05357000 |
| C | 0.71257900  | -1.42217800 | -3.44261800 |
| H | 0.10635300  | -3.07605400 | -2.21614200 |
| C | 3.08037200  | -1.16476800 | -3.81105300 |
| H | 4.33469000  | -2.67798000 | -2.91412700 |
| C | 1.77252100  | -0.71990400 | -4.01585500 |
| H | -0.31488200 | -1.07235700 | -3.55679500 |
| H | 3.92093800  | -0.62033200 | -4.24605300 |
| H | 1.58278900  | 0.17753100  | -4.60829600 |

**G1-IM1-sol**

|   |             |             |             |
|---|-------------|-------------|-------------|
| C | 2.89691800  | -0.13704700 | -0.15148400 |
| N | 2.40479100  | -1.32519500 | -0.26688100 |
| C | 1.56649900  | -1.90752000 | 0.67859400  |
| C | 1.88879800  | -1.98362200 | 2.04994300  |
| C | 0.38871500  | -2.54529600 | 0.24673700  |
| C | 1.07567300  | -2.68616600 | 2.93717000  |
| H | 2.79920500  | -1.49818800 | 2.40771700  |
| C | -0.42317100 | -3.24173800 | 1.13790000  |
| H | 0.11228300  | -2.47988000 | -0.80705100 |
| C | -0.08080700 | -3.32708200 | 2.48922000  |
| H | 1.35425900  | -2.73585500 | 3.99242300  |
| H | -1.34496500 | -3.69032100 | 0.76249000  |
| H | -0.71616300 | -3.87441300 | 3.18724300  |
| N | 3.76822600  | 0.30981600  | -1.11662500 |
| H | 4.31966700  | 1.12887200  | -0.89769600 |

|   |             |             |             |
|---|-------------|-------------|-------------|
| N | 2.61020500  | 0.75111700  | 0.85841200  |
| H | 1.77192500  | 0.50787200  | 1.39004800  |
| C | 2.83991800  | 2.18970500  | 0.77250800  |
| H | 3.90515700  | 2.35487400  | 0.53107700  |
| C | 1.97600800  | 2.86508700  | -0.29301200 |
| H | 2.21452000  | 3.93660300  | -0.36914700 |
| H | 2.13104700  | 2.39978600  | -1.27621300 |
| H | 0.91270200  | 2.76931200  | -0.02748500 |
| C | 2.59471300  | 2.79228000  | 2.15175100  |
| H | 3.25710900  | 2.33376400  | 2.89914600  |
| H | 2.77283800  | 3.87640600  | 2.13523000  |
| H | 1.55163900  | 2.61129800  | 2.45084600  |
| C | 4.31265900  | -0.58739900 | -2.12271700 |
| H | 3.46881000  | -1.20360200 | -2.46235200 |
| C | 4.84092400  | 0.24156500  | -3.28600400 |
| H | 5.22426700  | -0.41129000 | -4.08234600 |
| H | 4.04885000  | 0.87779400  | -3.70436500 |
| H | 5.67053200  | 0.89003000  | -2.95798300 |
| C | 5.37978500  | -1.51563600 | -1.54519400 |
| H | 4.95335600  | -2.09267000 | -0.71406200 |
| H | 5.74467700  | -2.21868500 | -2.30858300 |
| H | 6.23824000  | -0.93180300 | -1.17517600 |
| C | -0.98434100 | 0.80926800  | 0.71951300  |
| H | -0.60874200 | 0.14684600  | -0.07007100 |
| C | -1.30961800 | 0.17351800  | 2.00250800  |
| H | -2.08095300 | 0.63593700  | 2.62714500  |
| H | -1.15513600 | -0.90386700 | 2.10906400  |
| O | -0.12787400 | 0.94484700  | 1.84751000  |
| C | -1.67330000 | 2.05376600  | 0.26896300  |
| C | -2.35155800 | 2.07045200  | -0.95425900 |
| C | -1.64885000 | 3.20652200  | 1.06141400  |
| C | -3.00153100 | 3.23037400  | -1.37309600 |
| H | -2.39074100 | 1.15676200  | -1.55306100 |
| C | -2.29628000 | 4.36567600  | 0.63624600  |
| H | -1.10443900 | 3.18614200  | 2.00794300  |
| C | -2.97461500 | 4.38042200  | -0.58253900 |
| H | -3.53833100 | 3.23223800  | -2.32333600 |
| H | -2.27032000 | 5.26211300  | 1.25894600  |
| H | -3.48376300 | 5.28693500  | -0.91524000 |
| I | -3.43993100 | -1.67820200 | -1.02423700 |

**G1-TS1-sol**

|   |            |             |             |
|---|------------|-------------|-------------|
| C | 2.46702200 | -0.36149500 | -0.08768100 |
| N | 1.87059100 | -1.37059000 | -0.65595100 |

|   |             |             |             |
|---|-------------|-------------|-------------|
| C | 1.09438400  | -2.28662400 | 0.04362100  |
| C | 1.40850100  | -2.78734200 | 1.32623300  |
| C | -0.04669000 | -2.81486000 | -0.59256700 |
| C | 0.61015400  | -3.75251300 | 1.93307900  |
| H | 2.28440500  | -2.40056500 | 1.84740100  |
| C | -0.84783100 | -3.77063200 | 0.02467700  |
| H | -0.30306100 | -2.43543100 | -1.58371900 |
| C | -0.52650500 | -4.25210700 | 1.29439600  |
| H | 0.88021500  | -4.11463500 | 2.92791000  |
| H | -1.74384300 | -4.12423600 | -0.48974400 |
| H | -1.15624700 | -4.99724200 | 1.78299100  |
| N | 3.39981500  | 0.33158800  | -0.82550900 |
| H | 3.60703700  | 1.27417200  | -0.52560900 |
| N | 2.25236800  | 0.06057600  | 1.18666100  |
| H | 1.29918500  | -0.15599000 | 1.56911100  |
| C | 2.78812300  | 1.28509700  | 1.76019500  |
| H | 3.85970800  | 1.34918000  | 1.49899300  |
| C | 2.05347500  | 2.53314700  | 1.26060900  |
| H | 2.47700800  | 3.44751200  | 1.70370900  |
| H | 2.09888500  | 2.62629500  | 0.16451700  |
| H | 0.99209800  | 2.44866300  | 1.54030500  |
| C | 2.66526000  | 1.17152000  | 3.27765700  |
| H | 3.24548500  | 0.31536500  | 3.64969600  |
| H | 3.02236500  | 2.08702700  | 3.77090700  |
| H | 1.60477100  | 1.01266900  | 3.52625500  |
| C | 3.64450300  | 0.02393700  | -2.22736900 |
| H | 2.68016200  | -0.25304000 | -2.68301300 |
| C | 4.19254600  | 1.26920300  | -2.91231300 |
| H | 4.38173900  | 1.07155400  | -3.97620200 |
| H | 3.48153200  | 2.10586600  | -2.83982300 |
| H | 5.14438000  | 1.57824300  | -2.45046100 |
| C | 4.58840200  | -1.16634600 | -2.37058500 |
| H | 4.15503100  | -2.03818100 | -1.86390300 |
| H | 4.74250100  | -1.41629500 | -3.43107200 |
| H | 5.56441800  | -0.93572400 | -1.91590800 |
| C | -1.23529500 | 0.25074500  | 0.46075000  |
| H | -0.53223300 | -0.27248900 | -0.19063500 |
| C | -1.40126200 | -0.36598400 | 1.79015400  |
| H | -2.30553000 | -0.02491700 | 2.33747600  |
| H | -1.41725500 | -1.47272100 | 1.73216500  |
| O | -0.21734300 | 0.20272800  | 2.17780700  |
| C | -1.30926200 | 1.71449500  | 0.26464100  |
| C | -0.75773200 | 2.27621300  | -0.89285900 |
| C | -1.88080400 | 2.56122500  | 1.22287500  |

|   |             |             |             |
|---|-------------|-------------|-------------|
| C | -0.77466400 | 3.65426400  | -1.09386800 |
| H | -0.31494900 | 1.61197600  | -1.63965100 |
| C | -1.89151700 | 3.93873100  | 1.02646900  |
| H | -2.28557500 | 2.13336100  | 2.14063100  |
| C | -1.34012100 | 4.49170900  | -0.13205100 |
| H | -0.34061500 | 4.07692000  | -2.00195700 |
| H | -2.32894100 | 4.59037500  | 1.78521800  |
| H | -1.35055300 | 5.57275500  | -0.28227100 |
| I | -3.27107400 | -0.54920000 | -1.01355800 |

**G1-IM2-sol**

|   |             |             |             |
|---|-------------|-------------|-------------|
| C | 2.46702200  | -0.36149500 | -0.08768100 |
| N | 1.87059100  | -1.37059000 | -0.65595100 |
| C | 1.09438400  | -2.28662400 | 0.04362100  |
| C | 1.40850100  | -2.78734200 | 1.32623300  |
| C | -0.04669000 | -2.81486000 | -0.59256700 |
| C | 0.61015400  | -3.75251300 | 1.93307900  |
| H | 2.28440500  | -2.40056500 | 1.84740100  |
| C | -0.84783100 | -3.77063200 | 0.02467700  |
| H | -0.30306100 | -2.43543100 | -1.58371900 |
| C | -0.52650500 | -4.25210700 | 1.29439600  |
| H | 0.88021500  | -4.11463500 | 2.92791000  |
| H | -1.74384300 | -4.12423600 | -0.48974400 |
| H | -1.15624700 | -4.99724200 | 1.78299100  |
| N | 3.39981500  | 0.33158800  | -0.82550900 |
| H | 3.60703700  | 1.27417200  | -0.52560900 |
| N | 2.25236800  | 0.06057600  | 1.18666100  |
| H | 1.29918500  | -0.15599000 | 1.56911100  |
| C | 2.78812300  | 1.28509700  | 1.76019500  |
| H | 3.85970800  | 1.34918000  | 1.49899300  |
| C | 2.05347500  | 2.53314700  | 1.26060900  |
| H | 2.47700800  | 3.44751200  | 1.70370900  |
| H | 2.09888500  | 2.62629500  | 0.16451700  |
| H | 0.99209800  | 2.44866300  | 1.54030500  |
| C | 2.66526000  | 1.17152000  | 3.27765700  |
| H | 3.24548500  | 0.31536500  | 3.64969600  |
| H | 3.02236500  | 2.08702700  | 3.77090700  |
| H | 1.60477100  | 1.01266900  | 3.52625500  |
| C | 3.64450300  | 0.02393700  | -2.22736900 |
| H | 2.68016200  | -0.25304000 | -2.68301300 |
| C | 4.19254600  | 1.26920300  | -2.91231300 |
| H | 4.38173900  | 1.07155400  | -3.97620200 |
| H | 3.48153200  | 2.10586600  | -2.83982300 |
| H | 5.14438000  | 1.57824300  | -2.45046100 |

|   |             |             |             |
|---|-------------|-------------|-------------|
| C | 4.58840200  | -1.16634600 | -2.37058500 |
| H | 4.15503100  | -2.03818100 | -1.86390300 |
| H | 4.74250100  | -1.41629500 | -3.43107200 |
| H | 5.56441800  | -0.93572400 | -1.91590800 |
| C | -1.23529500 | 0.25074500  | 0.46075000  |
| H | -0.53223300 | -0.27248900 | -0.19063500 |
| C | -1.40126200 | -0.36598400 | 1.79015400  |
| H | -2.30553000 | -0.02491700 | 2.33747600  |
| H | -1.41725500 | -1.47272100 | 1.73216500  |
| O | -0.21734300 | 0.20272800  | 2.17780700  |
| C | -1.30926200 | 1.71449500  | 0.26464100  |
| C | -0.75773200 | 2.27621300  | -0.89285900 |
| C | -1.88080400 | 2.56122500  | 1.22287500  |
| C | -0.77466400 | 3.65426400  | -1.09386800 |
| H | -0.31494900 | 1.61197600  | -1.63965100 |
| C | -1.89151700 | 3.93873100  | 1.02646900  |
| H | -2.28557500 | 2.13336100  | 2.14063100  |
| C | -1.34012100 | 4.49170900  | -0.13205100 |
| H | -0.34061500 | 4.07692000  | -2.00195700 |
| H | -2.32894100 | 4.59037500  | 1.78521800  |
| H | -1.35055300 | 5.57275500  | -0.28227100 |
| I | -3.27107400 | -0.54920000 | -1.01355800 |

#### G1-TS2-sol

|   |             |             |             |
|---|-------------|-------------|-------------|
| C | 2.84291700  | 0.16745600  | -0.45719300 |
| N | 2.81445100  | -1.11728800 | -0.19877500 |
| C | 1.71476900  | -1.92136400 | -0.42023800 |
| C | 0.79434300  | -1.77647300 | -1.48548800 |
| C | 1.54695900  | -3.04286400 | 0.42004300  |
| C | -0.24122200 | -2.68991700 | -1.66682200 |
| H | 0.89759200  | -0.92351400 | -2.15632900 |
| C | 0.50526700  | -3.94529100 | 0.23768300  |
| H | 2.25952100  | -3.16621700 | 1.23677800  |
| C | -0.40674200 | -3.77739500 | -0.80598100 |
| H | -0.94464600 | -2.54312500 | -2.49106900 |
| H | 0.40058300  | -4.78808100 | 0.92509200  |
| H | -1.23565600 | -4.47337600 | -0.94281200 |
| N | 4.09121700  | 0.77005500  | -0.43928000 |
| H | 4.06561300  | 1.75166100  | -0.19166600 |
| N | 1.75814400  | 0.94115400  | -0.67903500 |
| C | 1.87651200  | 2.36934900  | -0.91219700 |
| H | 2.53050100  | 2.84896300  | -0.14938600 |
| C | 2.44982600  | 2.67601300  | -2.29866900 |
| H | 2.54847600  | 3.76190400  | -2.45317900 |

|   |             |             |             |
|---|-------------|-------------|-------------|
| H | 3.43458700  | 2.20949700  | -2.43576200 |
| H | 1.77039900  | 2.27465600  | -3.06633900 |
| C | 0.49943800  | 3.00467300  | -0.75035100 |
| H | 0.08905200  | 2.77346800  | 0.24117000  |
| H | 0.55297400  | 4.09430500  | -0.89315900 |
| H | -0.19430600 | 2.58734800  | -1.49773600 |
| C | 5.26031900  | 0.05268000  | 0.05086300  |
| H | 4.93795300  | -0.61564000 | 0.86606200  |
| C | 5.86979200  | -0.81033900 | -1.04916400 |
| H | 6.72331500  | -1.38930100 | -0.66423300 |
| H | 5.11159200  | -1.50868000 | -1.42538800 |
| H | 6.21804700  | -0.17749600 | -1.88075000 |
| C | 6.26110600  | 1.06405300  | 0.59583100  |
| H | 5.81827100  | 1.64492400  | 1.41912100  |
| H | 7.15662000  | 0.55449400  | 0.97787200  |
| H | 6.57739900  | 1.76213800  | -0.19598300 |
| H | 0.87186600  | 0.65127200  | 0.06510600  |
| C | -1.94875700 | 0.05344700  | -0.04496200 |
| H | -1.49151800 | -0.09091400 | -1.03329000 |
| C | -0.96706900 | -0.38122200 | 1.05059400  |
| H | -1.52815400 | -0.42555400 | 2.01233600  |
| H | -0.66585700 | -1.42649200 | 0.83145300  |
| O | 0.06560200  | 0.51113900  | 1.09845400  |
| C | -2.50989800 | 1.44042900  | 0.08363000  |
| C | -3.08651800 | 2.07720900  | -1.02235000 |
| C | -2.43712400 | 2.13646500  | 1.29537900  |
| C | -3.58158500 | 3.37551000  | -0.92505100 |
| H | -3.14493700 | 1.54011600  | -1.97296000 |
| C | -2.93040000 | 3.43642100  | 1.39468700  |
| H | -1.93727900 | 1.67324200  | 2.14530800  |
| C | -3.50480900 | 4.06105300  | 0.28803400  |
| H | -4.02420800 | 3.85565000  | -1.79977400 |
| H | -2.85276000 | 3.97083000  | 2.34344300  |
| H | -3.88587900 | 5.08081900  | 0.36833300  |
| I | -3.63376400 | -1.39174900 | -0.12272800 |
| C | 1.91896200  | -0.05523500 | 2.54888700  |
| O | 1.46671400  | -1.05686500 | 2.91991300  |
| O | 2.50857500  | 0.92202500  | 2.32900400  |

**G1-IM3-sol**

|   |             |             |            |
|---|-------------|-------------|------------|
| C | -2.74645500 | -0.19326600 | 0.54590400 |
| N | -2.30179400 | -1.39491800 | 0.73004600 |
| C | -1.08354700 | -1.68289700 | 1.31799900 |
| C | -0.59186800 | -1.08298000 | 2.49772100 |

|   |             |             |             |
|---|-------------|-------------|-------------|
| C | -0.30739100 | -2.71112900 | 0.74003200  |
| C | 0.62091400  | -1.49065100 | 3.05437200  |
| H | -1.17402900 | -0.29098700 | 2.97005300  |
| C | 0.90451000  | -3.10509600 | 1.29522600  |
| H | -0.69275800 | -3.17416700 | -0.17036900 |
| C | 1.38417400  | -2.49563300 | 2.45876400  |
| H | 0.97545100  | -1.00984700 | 3.96973500  |
| H | 1.48934100  | -3.88952700 | 0.81003600  |
| H | 2.33942500  | -2.79839300 | 2.88996900  |
| N | -4.00656300 | -0.00984600 | 0.01589700  |
| H | -3.95076100 | 0.73127500  | -0.68141700 |
| N | -2.04819900 | 0.95546800  | 0.84747700  |
| C | -2.48688200 | 2.29266800  | 0.44958800  |
| H | -2.83150700 | 2.26896300  | -0.59764200 |
| C | -3.59573600 | 2.79992500  | 1.36819500  |
| H | -3.93792300 | 3.79362800  | 1.04191000  |
| H | -4.45302600 | 2.11436900  | 1.36510700  |
| H | -3.21825100 | 2.87997300  | 2.39937800  |
| C | -1.27264000 | 3.20978200  | 0.48906000  |
| H | -0.49165400 | 2.83360500  | -0.18851800 |
| H | -1.54959500 | 4.22643000  | 0.17549400  |
| H | -0.85670300 | 3.25968200  | 1.50794100  |
| C | -4.70497300 | -1.17378700 | -0.52728700 |
| H | -3.95882100 | -1.84633300 | -0.98229900 |
| C | -5.43027000 | -1.93055200 | 0.57909500  |
| H | -5.94169900 | -2.81535800 | 0.17081900  |
| H | -4.71139100 | -2.26293500 | 1.33924400  |
| H | -6.17895700 | -1.27883500 | 1.05634100  |
| C | -5.65768800 | -0.68790200 | -1.61125300 |
| H | -5.08987800 | -0.18002800 | -2.40459200 |
| H | -6.19767900 | -1.53459500 | -2.05776800 |
| H | -6.39730500 | 0.01420800  | -1.19355900 |
| H | -1.05069500 | 0.81169700  | 0.69741700  |
| C | 1.75461500  | -0.10056000 | -0.32122700 |
| H | 1.35155900  | -0.63067500 | 0.54894800  |
| C | 0.92250200  | -0.40142100 | -1.55895600 |
| H | 1.44294100  | -0.07644200 | -2.47776200 |
| H | 0.77200900  | -1.48786800 | -1.64644500 |
| O | -0.28967300 | 0.27445400  | -1.39371300 |
| C | 1.95458900  | 1.34704300  | 0.00269000  |
| C | 1.94238500  | 1.75463500  | 1.34071200  |
| C | 2.12690900  | 2.31043100  | -0.99917300 |
| C | 2.09908600  | 3.09884300  | 1.67600400  |
| H | 1.80001100  | 1.00120800  | 2.11980300  |

|   |             |             |             |
|---|-------------|-------------|-------------|
| C | 2.27814000  | 3.65306500  | -0.66549900 |
| H | 2.12623700  | 2.00625900  | -2.04747300 |
| C | 2.26541400  | 4.05218000  | 0.67299000  |
| H | 2.08019900  | 3.40293800  | 2.72417700  |
| H | 2.40032200  | 4.39631300  | -1.45526700 |
| H | 2.38028600  | 5.10653700  | 0.93031800  |
| I | 3.71406300  | -1.07702200 | -0.57715600 |
| C | -1.31672600 | -0.03818800 | -2.35550000 |
| O | -1.03227700 | -0.92119100 | -3.15929100 |
| O | -2.32542400 | 0.66037400  | -2.20637400 |

**G1-TS3-sol**

|   |             |             |             |
|---|-------------|-------------|-------------|
| C | 0.74253400  | 2.63597800  | 1.34247100  |
| O | 0.22038600  | 3.73023300  | 1.40322700  |
| O | 0.20643200  | 1.48221800  | 1.42785600  |
| I | 3.53324300  | -1.18653900 | -0.70742800 |
| C | 2.61413700  | 1.25623800  | 1.25565100  |
| C | 1.67585400  | 0.25955000  | 0.59028700  |
| O | 2.10354300  | 2.56722800  | 1.14687900  |
| H | 2.75377000  | 0.98810700  | 2.31511600  |
| H | 3.58875000  | 1.26661800  | 0.76352300  |
| C | 1.04426100  | -0.91274900 | 1.23690700  |
| C | 1.40903000  | -1.35934100 | 2.51098400  |
| C | -0.00502700 | -1.55609900 | 0.56511700  |
| C | 0.73991200  | -2.42910400 | 3.10144200  |
| H | 2.22945900  | -0.88017800 | 3.04649400  |
| C | -0.66799300 | -2.62789800 | 1.15387900  |
| H | -0.29778300 | -1.20835900 | -0.42918300 |
| C | -0.29934300 | -3.06949000 | 2.42611800  |
| H | 1.03822700  | -2.76820200 | 4.09504200  |
| H | -1.48165400 | -3.11863600 | 0.61560800  |
| H | -0.81843200 | -3.91011000 | 2.89014000  |
| H | 1.30200700  | 0.53822100  | -0.39577000 |
| C | 1.27564500  | 0.97516700  | -3.00905100 |
| C | 0.07792700  | 0.32130100  | -2.73465100 |
| C | -0.93125600 | 0.92475200  | -1.95537000 |
| C | -0.69277300 | 2.23759700  | -1.49506300 |
| C | 0.50887500  | 2.88696000  | -1.77091300 |
| C | 1.50581100  | 2.26292200  | -2.52204300 |
| H | 2.04977200  | 0.45888100  | -3.57929200 |
| H | -0.09974200 | -0.69219100 | -3.10012100 |
| H | -1.43779000 | 2.74892300  | -0.88509900 |
| H | 0.67144100  | 3.88241500  | -1.35351500 |
| H | 2.45517300  | 2.76608300  | -2.71020100 |



|   |             |             |             |
|---|-------------|-------------|-------------|
| N | -2.09241700 | 0.19065600  | -1.73552000 |
| C | -2.77130000 | 0.23695500  | -0.62757100 |
| N | -4.00092900 | -0.39601900 | -0.58854500 |
| H | -4.27676000 | -0.74049000 | 0.32462900  |
| N | -2.38802600 | 0.86174200  | 0.51276400  |
| C | -4.45094200 | -1.21714400 | -1.70260400 |
| C | -5.96365700 | -1.38039500 | -1.61724700 |
| C | -3.73234400 | -2.56500300 | -1.74700300 |
| H | -4.19114900 | -0.65886600 | -2.61165000 |
| H | -6.46215600 | -0.40137900 | -1.61487100 |
| H | -6.33886800 | -1.96661100 | -2.46801700 |
| H | -6.24625700 | -1.91360500 | -0.69434500 |
| H | -2.64748800 | -2.40231400 | -1.80556400 |
| H | -3.96292200 | -3.15134600 | -0.84183700 |
| H | -4.04584900 | -3.15338800 | -2.62233100 |
| C | -3.12743600 | 0.98039300  | 1.75894200  |
| C | -2.95349600 | 2.39982400  | 2.29692900  |
| C | -2.66408000 | -0.07125000 | 2.76830300  |
| H | -4.19565100 | 0.83428800  | 1.53385800  |
| H | -3.38796800 | 3.12770300  | 1.59687800  |
| H | -3.44725600 | 2.51065800  | 3.27363600  |
| H | -1.88471900 | 2.63846000  | 2.40093600  |
| H | -2.82775500 | -1.08868700 | 2.38213100  |
| H | -1.58249600 | 0.04736600  | 2.94134700  |
| H | -3.19543000 | 0.03379300  | 3.72621400  |
| H | -1.40169200 | 1.13230800  | 0.60227500  |

#### G1-IM4-sol

|   |            |             |             |
|---|------------|-------------|-------------|
| C | 0.90222300 | 3.04265000  | -1.34517300 |
| O | 0.40796200 | 3.89806200  | -2.01029200 |
| O | 0.22556400 | 2.27126000  | -0.47532500 |
| I | 3.57540900 | -1.89341600 | 0.38159100  |
| C | 2.47006600 | 1.73176900  | -0.34214400 |
| C | 1.06979100 | 1.22115300  | 0.03424400  |
| O | 2.19749400 | 2.72300000  | -1.33649200 |
| H | 2.98324600 | 2.20872100  | 0.50564000  |
| H | 3.09632100 | 0.93553500  | -0.76078600 |
| C | 0.79753500 | 1.02605000  | 1.49987800  |
| C | 0.75638200 | 2.12706900  | 2.36189700  |
| C | 0.58589800 | -0.25767700 | 2.00534400  |
| C | 0.51161200 | 1.94638900  | 3.72147100  |
| H | 0.90944100 | 3.13327100  | 1.96285200  |
| C | 0.34730600 | -0.43818100 | 3.36814700  |
| H | 0.64111300 | -1.11307300 | 1.32906800  |

|   |             |             |             |
|---|-------------|-------------|-------------|
| C | 0.30986900  | 0.65997800  | 4.22633800  |
| H | 0.48044500  | 2.80952700  | 4.38843700  |
| H | 0.19722300  | -1.44552600 | 3.75920900  |
| H | 0.12450700  | 0.51491200  | 5.29211000  |
| H | 0.84284300  | 0.30074600  | -0.52050700 |
| C | 1.28418100  | -1.02534100 | -2.75591900 |
| C | 0.12286500  | -1.46990200 | -2.12959500 |
| C | -1.05349900 | -0.69587800 | -2.14024700 |
| C | -1.03184200 | 0.52308700  | -2.84737900 |
| C | 0.12982000  | 0.96119200  | -3.48067000 |
| C | 1.29877100  | 0.19901700  | -3.42841800 |
| H | 2.19212800  | -1.62601800 | -2.67765400 |
| H | 0.11964100  | -2.41296000 | -1.58044800 |
| H | -1.93600700 | 1.13464800  | -2.88346800 |
| H | 0.12365800  | 1.92126200  | -4.00066400 |
| H | 2.21261900  | 0.55777400  | -3.90442600 |
| N | -2.18813200 | -1.18502000 | -1.50007300 |
| C | -2.84867600 | -0.47943700 | -0.64110600 |
| N | -4.03616200 | -0.97925200 | -0.14603000 |
| H | -4.33738600 | -0.60929900 | 0.74698900  |
| N | -2.48711300 | 0.75396100  | -0.17260500 |
| C | -4.40804300 | -2.36827800 | -0.38038100 |
| C | -5.90204400 | -2.52735500 | -0.12808100 |
| C | -3.57734700 | -3.32875000 | 0.46934700  |
| H | -4.19108000 | -2.56565100 | -1.43863400 |
| H | -6.48255800 | -1.84629900 | -0.76558400 |
| H | -6.21945400 | -3.55932900 | -0.33290300 |
| H | -6.14470200 | -2.30717700 | 0.92493500  |
| H | -2.50934800 | -3.17421100 | 0.26626000  |
| H | -3.76695000 | -3.15523700 | 1.54133900  |
| H | -3.82858600 | -4.37540500 | 0.24226000  |
| C | -3.20173000 | 1.52563900  | 0.83227700  |
| C | -2.81979700 | 2.99423200  | 0.68892500  |
| C | -2.92588200 | 1.03033900  | 2.25502500  |
| H | -4.28010400 | 1.43235400  | 0.61518800  |
| H | -3.01298600 | 3.35253800  | -0.33173700 |
| H | -3.39226900 | 3.60844200  | 1.39751000  |
| H | -1.74783600 | 3.12401200  | 0.89867400  |
| H | -3.12465300 | -0.04697200 | 2.36167600  |
| H | -1.86732800 | 1.19357900  | 2.50490900  |
| H | -3.54624000 | 1.57244500  | 2.98447900  |
| H | -1.60544400 | 1.13545300  | -0.50391400 |
